# Supplementary material
Source: publisher figshare collection journal article supplement (https://acs.figshare.com/ndownloader/files/4486594)
Supplement: Supplementary file 1 [file 4486594]

##############################################################################
#   Combined CIF 3-2-3                                                       #
##############################################################################

data_Eu0.66Ca2.34In2Ge3
 
_audit_creation_method            SHELXL-97 
_chemical_name_systematic 
; 
 ? 
; 
_chemical_name_common             ? 
_chemical_melting_point           ? 
_chemical_formula_moiety          'Ca2.34 Eu0.66 Ge3 In2'
_chemical_formula_sum 
 'Ca2.34 Eu0.66 Ge3 In2' 
_chemical_formula_weight          640.37
 
loop_ 
 _atom_type_symbol 
 _atom_type_description 
 _atom_type_scat_dispersion_real 
 _atom_type_scat_dispersion_imag 
 _atom_type_scat_source 
 'Ca'  'Ca'   0.2262   0.3064 
 'International Tables Vol C Tables 4.2.6.8 and 6.1.1.4' 
 'Ge'  'Ge'   0.1547   1.8001 
 'International Tables Vol C Tables 4.2.6.8 and 6.1.1.4' 
 'In'  'In'  -0.7276   1.3100 
 'International Tables Vol C Tables 4.2.6.8 and 6.1.1.4' 
 'Eu'  'Eu'  -0.1578   3.6682 
 'International Tables Vol C Tables 4.2.6.8 and 6.1.1.4' 
 
_symmetry_cell_setting            Orthorhombic
_symmetry_space_group_name_H-M    Pnma 
 
loop_ 
 _symmetry_equiv_pos_as_xyz 
 'x, y, z' 
 '-x+1/2, -y, z+1/2' 
 '-x, y+1/2, -z' 
 'x+1/2, -y+1/2, -z+1/2' 
 '-x, -y, -z' 
 'x-1/2, y, -z-1/2' 
 'x, -y-1/2, z' 
 '-x-1/2, y-1/2, z-1/2' 
 
_cell_length_a                    7.4010(9) 
_cell_length_b                    4.4640(6) 
_cell_length_c                    23.734(3) 
_cell_angle_alpha                 90.00 
_cell_angle_beta                  90.00 
_cell_angle_gamma                 90.00 
_cell_volume                      784.13(17) 
_cell_formula_units_Z             4 
_cell_measurement_temperature     200(2) 
_cell_measurement_reflns_used     1100 
_cell_measurement_theta_min       2.88 
_cell_measurement_theta_max       28.47 
 
_exptl_crystal_description        'irregular' 
_exptl_crystal_colour             'silver' 
_exptl_crystal_size_max           0.045 
_exptl_crystal_size_mid           0.035
_exptl_crystal_size_min           0.032 
_exptl_crystal_density_meas       ? 
_exptl_crystal_density_diffrn     5.434 
_exptl_crystal_density_method     'not measured' 
_exptl_crystal_F_000              1100 
_exptl_absorpt_coefficient_mu     23.763 
_exptl_absorpt_correction_type    empirical 
_exptl_absorpt_correction_T_min   0.0333 
_exptl_absorpt_correction_T_max   0.0491 
_exptl_absorpt_process_details    'SADABS' 
 
_exptl_special_details 
; 
 ? 
; 
 
_diffrn_ambient_temperature       200(2) 
_diffrn_radiation_wavelength      0.71073 
_diffrn_radiation_type            MoK\a 
_diffrn_radiation_source          'fine-focus sealed tube' 
_diffrn_radiation_monochromator   graphite 
_diffrn_measurement_device_type   'CCD area detector' 
_diffrn_measurement_method        'phi and omega scans' 
_diffrn_detector_area_resol_mean  ? 
_diffrn_standards_number          ? 
_diffrn_standards_interval_count  ? 
_diffrn_standards_interval_time   ? 
_diffrn_standards_decay_%         ? 
_diffrn_reflns_number             10317 
_diffrn_reflns_av_R_equivalents   0.0794 
_diffrn_reflns_av_sigmaI/netI     0.0397 
_diffrn_reflns_limit_h_min        -9 
_diffrn_reflns_limit_h_max        9 
_diffrn_reflns_limit_k_min        -5 
_diffrn_reflns_limit_k_max        5 
_diffrn_reflns_limit_l_min        -31 
_diffrn_reflns_limit_l_max        31 
_diffrn_reflns_theta_min          1.72 
_diffrn_reflns_theta_max          28.36 
_reflns_number_total              1100 
_reflns_number_gt                 877 
_reflns_threshold_expression      >2sigma(I) 
 
_computing_data_collection        'Bruker SMART' 
_computing_cell_refinement        'Bruker SMART' 
_computing_data_reduction         'Bruker SAINT' 
_computing_structure_solution     'SHELXS-97 (Sheldrick, 1990)' 
_computing_structure_refinement   'SHELXL-97 (Sheldrick, 1997)' 
_computing_molecular_graphics     'Bruker SHELXTL' 
_computing_publication_material   'Bruker SHEMXTL'  
 
_refine_special_details 
; 
 Refinement of F^2^ against ALL reflections.  The weighted R-factor wR and 
 goodness of fit S are based on F^2^, conventional R-factors R are based 
 on F, with F set to zero for negative F^2^. The threshold expression of 
 F^2^ > 2sigma(F^2^) is used only for calculating R-factors(gt) etc. and is 
 not relevant to the choice of reflections for refinement.  R-factors based 
 on F^2^ are statistically about twice as large as those based on F, and R- 
 factors based on ALL data will be even larger. 
; 
 
_refine_ls_structure_factor_coef  Fsqd  
_refine_ls_matrix_type            full 
_refine_ls_weighting_scheme       calc  
_refine_ls_weighting_details 
 'calc w=1/[\s^2^(Fo^2^)+(0.0150P)^2^+1.4047P] where P=(Fo^2^+2Fc^2^)/3' 
_atom_sites_solution_primary      direct 
_atom_sites_solution_secondary    difmap 
_atom_sites_solution_hydrogens    . 
_refine_ls_hydrogen_treatment     . 
_refine_ls_extinction_method      SHELXL 
_refine_ls_extinction_coef        0.00041(5) 
_refine_ls_extinction_expression  
 'Fc^*^=kFc[1+0.001xFc^2^\l^3^/sin(2\q)]^-1/4^' 
_refine_ls_number_reflns          1100 
_refine_ls_number_parameters      53 
_refine_ls_number_restraints      0 
_refine_ls_R_factor_all           0.0479 
_refine_ls_R_factor_gt            0.0320 
_refine_ls_wR_factor_ref          0.0596 
_refine_ls_wR_factor_gt           0.0542 
_refine_ls_goodness_of_fit_ref    1.060 
_refine_ls_restrained_S_all       1.060 
_refine_ls_shift/su_max           0.000 
_refine_ls_shift/su_mean          0.000 
 
loop_ 
 _atom_site_label 
 _atom_site_type_symbol 
 _atom_site_fract_x 
 _atom_site_fract_y 
 _atom_site_fract_z 
 _atom_site_U_iso_or_equiv 
 _atom_site_adp_type 
 _atom_site_occupancy 
 _atom_site_symmetry_multiplicity 
 _atom_site_calc_flag 
 _atom_site_refinement_flags 
 _atom_site_disorder_assembly 
 _atom_site_disorder_group 
Eu1 Eu 0.01103(16) 0.2500 0.07214(5) 0.0155(4) Uani 0.195(3) 2 d SP . . 
Ca1 Ca 0.01103(16) 0.2500 0.07214(5) 0.0155(4) Uani 0.805(3) 2 d SP . . 
Eu2 Eu 0.02434(13) 0.2500 0.38179(4) 0.0144(3) Uani 0.345(3) 2 d SP . . 
Ca2 Ca 0.02434(13) 0.2500 0.38179(4) 0.0144(3) Uani 0.655(3) 2 d SP . . 
Eu3 Eu 0.16416(19) 0.2500 0.22644(6) 0.0147(5) Uani 0.123(3) 2 d SP . . 
Ca3 Ca 0.16416(19) 0.2500 0.22644(6) 0.0147(5) Uani 0.877(3) 2 d SP . . 
In1 In 0.15051(9) 0.2500 0.52725(3) 0.01523(18) Uani 1 2 d S . . 
In2 In 0.16307(10) 0.2500 0.82559(3) 0.0224(2) Uani 1 2 d S . . 
Ge1 Ge 0.03834(14) 0.2500 0.71009(4) 0.0144(2) Uani 1 2 d S . . 
Ge2 Ge 0.28457(14) 0.2500 0.63633(4) 0.0147(2) Uani 1 2 d S . . 
Ge3 Ge 0.76464(14) 0.2500 0.53866(4) 0.0158(2) Uani 1 2 d S . . 
 
loop_ 
 _atom_site_aniso_label 
 _atom_site_aniso_U_11 
 _atom_site_aniso_U_22 
 _atom_site_aniso_U_33 
 _atom_site_aniso_U_23 
 _atom_site_aniso_U_13 
 _atom_site_aniso_U_12 
Eu1 0.0152(7) 0.0156(7) 0.0158(7) 0.000 -0.0023(5) 0.000 
Ca1 0.0152(7) 0.0156(7) 0.0158(7) 0.000 -0.0023(5) 0.000 
Eu2 0.0158(6) 0.0130(5) 0.0146(5) 0.000 -0.0013(4) 0.000 
Ca2 0.0158(6) 0.0130(5) 0.0146(5) 0.000 -0.0013(4) 0.000 
Eu3 0.0165(9) 0.0126(8) 0.0151(8) 0.000 0.0022(6) 0.000 
Ca3 0.0165(9) 0.0126(8) 0.0151(8) 0.000 0.0022(6) 0.000 
In1 0.0171(4) 0.0144(4) 0.0143(3) 0.000 -0.0002(3) 0.000 
In2 0.0167(4) 0.0303(4) 0.0202(4) 0.000 0.0004(3) 0.000 
Ge1 0.0154(5) 0.0129(5) 0.0147(5) 0.000 0.0009(4) 0.000 
Ge2 0.0161(5) 0.0147(5) 0.0134(5) 0.000 0.0003(4) 0.000 
Ge3 0.0164(5) 0.0124(5) 0.0186(5) 0.000 -0.0002(4) 0.000 
 
_geom_special_details 
; 
 All esds (except the esd in the dihedral angle between two l.s. planes) 
 are estimated using the full covariance matrix.  The cell esds are taken 
 into account individually in the estimation of esds in distances, angles 
 and torsion angles; correlations between esds in cell parameters are only 
 used when they are defined by crystal symmetry.  An approximate (isotropic) 
 treatment of cell esds is used for estimating esds involving l.s. planes. 
; 
 
loop_ 
 _geom_bond_atom_site_label_1 
 _geom_bond_atom_site_label_2 
 _geom_bond_distance 
 _geom_bond_site_symmetry_2 
 _geom_bond_publ_flag 
Eu1 Ge2 3.0970(11) 2_564 ? 
Eu1 Ge2 3.0970(11) 2_554 ? 
Eu1 Ge3 3.1266(12) 2_554 ? 
Eu1 Ge3 3.1266(12) 2_564 ? 
Eu1 Ge3 3.2307(16) 6_556 ? 
Eu1 In1 3.5202(11) 2_564 ? 
Eu1 In1 3.5202(11) 2_554 ? 
Eu1 In2 3.5404(11) 5_566 ? 
Eu1 In2 3.5404(11) 5_556 ? 
Eu1 In1 3.5615(14) 6_556 ? 
Eu1 Ca2 3.7643(16) 6_556 ? 
Eu1 Eu2 3.7643(16) 6_556 ? 
Eu2 Ge1 3.1547(10) 5_556 ? 
Eu2 Ge1 3.1547(10) 5_566 ? 
Eu2 Ge2 3.2239(11) 5_556 ? 
Eu2 Ge2 3.2239(11) 5_566 ? 
Eu2 Ge3 3.3145(11) 5_666 ? 
Eu2 Ge3 3.3145(11) 5_656 ? 
Eu2 In1 3.3641(9) 5_566 ? 
Eu2 In1 3.3641(9) 5_556 ? 
Eu2 In2 3.4804(10) 2_564 ? 
Eu2 In2 3.4804(9) 2_554 ? 
Eu2 In1 3.5766(12) . ? 
Eu2 Ca3 3.7018(17) 6_556 ? 
Eu3 Ge1 3.0818(12) 5_566 ? 
Eu3 Ge1 3.0818(12) 5_556 ? 
Eu3 Ge2 3.1144(12) 2_554 ? 
Eu3 Ge2 3.1144(12) 2_564 ? 
Eu3 Ge1 3.1591(13) 2_564 ? 
Eu3 Ge1 3.1591(13) 2_554 ? 
Eu3 In2 3.4863(12) 2_564 ? 
Eu3 In2 3.4863(12) 2_554 ? 
Eu3 In2 3.5174(13) 5_556 ? 
Eu3 In2 3.5174(13) 5_566 ? 
Eu3 Eu2 3.7018(17) 6_656 ? 
Eu3 Ca2 3.7018(17) 6_656 ? 
In1 Ge2 2.7724(12) . ? 
In1 Ge3 2.7970(8) 5_656 ? 
In1 Ge3 2.7970(8) 5_666 ? 
In1 Ge3 2.8686(13) 1_455 ? 
In1 Ca2 3.3641(9) 5_566 ? 
In1 Eu2 3.3641(9) 5_566 ? 
In1 Ca2 3.3641(9) 5_556 ? 
In1 Eu2 3.3641(9) 5_556 ? 
In1 Eu1 3.5202(11) 2_565 ? 
In1 Ca1 3.5202(11) 2_565 ? 
In1 Eu1 3.5202(11) 2 ? 
In1 Ca1 3.5202(11) 2 ? 
In2 Ge1 2.8925(13) . ? 
In2 Ge1 2.9036(13) 6_657 ? 
In2 Ge2 2.9435(13) 6_557 ? 
In2 Ca2 3.4804(10) 2_565 ? 
In2 Eu2 3.4804(10) 2_565 ? 
In2 Ca2 3.4804(9) 2 ? 
In2 Eu2 3.4804(9) 2 ? 
In2 Ca3 3.4863(12) 2 ? 
In2 Eu3 3.4863(12) 2 ? 
In2 Ca3 3.4863(12) 2_565 ? 
In2 Eu3 3.4863(12) 2_565 ? 
In2 Eu3 3.5174(13) 5_556 ? 
Ge1 Ge2 2.5270(14) . ? 
Ge1 In2 2.9036(13) 6_557 ? 
Ge1 Ca3 3.0818(12) 5_566 ? 
Ge1 Ca3 3.0818(12) 5_556 ? 
Ge1 Eu3 3.0818(12) 5_566 ? 
Ge1 Eu3 3.0818(12) 5_556 ? 
Ge1 Eu2 3.1547(10) 5_556 ? 
Ge1 Ca2 3.1547(10) 5_556 ? 
Ge1 Ca2 3.1547(10) 5_566 ? 
Ge1 Eu2 3.1547(10) 5_566 ? 
Ge1 Eu3 3.1591(13) 2_565 ? 
Ge2 In2 2.9435(13) 6_657 ? 
Ge2 Eu1 3.0970(11) 2 ? 
Ge2 Eu1 3.0970(11) 2_565 ? 
Ge2 Ca1 3.0970(11) 2 ? 
Ge2 Ca1 3.0970(11) 2_565 ? 
Ge2 Ca3 3.1144(12) 2_565 ? 
Ge2 Eu3 3.1144(12) 2_565 ? 
Ge2 Ca3 3.1144(12) 2 ? 
Ge2 Eu3 3.1144(12) 2 ? 
Ge2 Eu2 3.2239(11) 5_556 ? 
Ge3 In1 2.7970(8) 5_656 ? 
Ge3 In1 2.7970(8) 5_666 ? 
Ge3 In1 2.8686(13) 1_655 ? 
Ge3 Eu1 3.1266(12) 2 ? 
Ge3 Ca1 3.1266(12) 2 ? 
Ge3 Eu1 3.1266(12) 2_565 ? 
Ge3 Ca1 3.1266(12) 2_565 ? 
Ge3 Ca1 3.2307(16) 6_656 ? 
Ge3 Eu1 3.2307(16) 6_656 ? 
Ge3 Eu2 3.3145(11) 5_666 ? 
Ge3 Ca2 3.3145(11) 5_666 ? 
Ge3 Ca2 3.3145(11) 5_656 ? 
 
loop_ 
 _geom_angle_atom_site_label_1 
 _geom_angle_atom_site_label_2 
 _geom_angle_atom_site_label_3 
 _geom_angle 
 _geom_angle_site_symmetry_1 
 _geom_angle_site_symmetry_3 
 _geom_angle_publ_flag 
Ge2 Eu1 Ge2 92.22(4) 2_564 2_554 ? 
Ge2 Eu1 Ge3 163.38(5) 2_564 2_554 ? 
Ge2 Eu1 Ge3 85.95(2) 2_554 2_554 ? 
Ge2 Eu1 Ge3 85.95(2) 2_564 2_564 ? 
Ge2 Eu1 Ge3 163.38(5) 2_554 2_564 ? 
Ge3 Eu1 Ge3 91.10(4) 2_554 2_564 ? 
Ge2 Eu1 Ge3 96.70(4) 2_564 6_556 ? 
Ge2 Eu1 Ge3 96.70(4) 2_554 6_556 ? 
Ge3 Eu1 Ge3 99.92(4) 2_554 6_556 ? 
Ge3 Eu1 Ge3 99.92(4) 2_564 6_556 ? 
Ge2 Eu1 In1 49.03(2) 2_564 2_564 ? 
Ge2 Eu1 In1 104.97(4) 2_554 2_564 ? 
Ge3 Eu1 In1 147.15(5) 2_554 2_564 ? 
Ge3 Eu1 In1 86.26(2) 2_564 2_564 ? 
Ge3 Eu1 In1 48.72(2) 6_556 2_564 ? 
Ge2 Eu1 In1 104.97(4) 2_564 2_554 ? 
Ge2 Eu1 In1 49.03(2) 2_554 2_554 ? 
Ge3 Eu1 In1 86.26(2) 2_554 2_554 ? 
Ge3 Eu1 In1 147.15(5) 2_564 2_554 ? 
Ge3 Eu1 In1 48.72(2) 6_556 2_554 ? 
In1 Eu1 In1 78.70(3) 2_564 2_554 ? 
Ge2 Eu1 In2 52.13(3) 2_564 5_566 ? 
Ge2 Eu1 In2 107.15(4) 2_554 5_566 ? 
Ge3 Eu1 In2 112.76(4) 2_554 5_566 ? 
Ge3 Eu1 In2 59.12(3) 2_564 5_566 ? 
Ge3 Eu1 In2 140.308(17) 6_556 5_566 ? 
In1 Eu1 In2 93.826(18) 2_564 5_566 ? 
In1 Eu1 In2 150.02(4) 2_554 5_566 ? 
Ge2 Eu1 In2 107.15(4) 2_564 5_556 ? 
Ge2 Eu1 In2 52.13(3) 2_554 5_556 ? 
Ge3 Eu1 In2 59.12(3) 2_554 5_556 ? 
Ge3 Eu1 In2 112.76(4) 2_564 5_556 ? 
Ge3 Eu1 In2 140.308(17) 6_556 5_556 ? 
In1 Eu1 In2 150.02(4) 2_564 5_556 ? 
In1 Eu1 In2 93.826(18) 2_554 5_556 ? 
In2 Eu1 In2 78.16(3) 5_566 5_556 ? 
Ge2 Eu1 In1 133.77(2) 2_564 6_556 ? 
Ge2 Eu1 In1 133.77(2) 2_554 6_556 ? 
Ge3 Eu1 In1 48.91(2) 2_554 6_556 ? 
Ge3 Eu1 In1 48.91(2) 2_564 6_556 ? 
Ge3 Eu1 In1 84.04(4) 6_556 6_556 ? 
In1 Eu1 In1 109.43(3) 2_564 6_556 ? 
In1 Eu1 In1 109.43(3) 2_554 6_556 ? 
In2 Eu1 In1 100.46(3) 5_566 6_556 ? 
In2 Eu1 In1 100.46(3) 5_556 6_556 ? 
Ge2 Eu1 Ca2 108.93(3) 2_564 6_556 ? 
Ge2 Eu1 Ca2 108.93(3) 2_554 6_556 ? 
Ge3 Eu1 Ca2 56.59(3) 2_554 6_556 ? 
Ge3 Eu1 Ca2 56.59(3) 2_564 6_556 ? 
Ge3 Eu1 Ca2 142.41(4) 6_556 6_556 ? 
In1 Eu1 Ca2 140.249(16) 2_564 6_556 ? 
In1 Eu1 Ca2 140.249(16) 2_554 6_556 ? 
In2 Eu1 Ca2 56.81(2) 5_566 6_556 ? 
In2 Eu1 Ca2 56.81(2) 5_556 6_556 ? 
In1 Eu1 Ca2 58.37(3) 6_556 6_556 ? 
Ge2 Eu1 Eu2 108.93(3) 2_564 6_556 ? 
Ge2 Eu1 Eu2 108.93(3) 2_554 6_556 ? 
Ge3 Eu1 Eu2 56.59(3) 2_554 6_556 ? 
Ge3 Eu1 Eu2 56.59(3) 2_564 6_556 ? 
Ge3 Eu1 Eu2 142.41(4) 6_556 6_556 ? 
In1 Eu1 Eu2 140.249(16) 2_564 6_556 ? 
In1 Eu1 Eu2 140.249(16) 2_554 6_556 ? 
In2 Eu1 Eu2 56.81(2) 5_566 6_556 ? 
In2 Eu1 Eu2 56.81(2) 5_556 6_556 ? 
In1 Eu1 Eu2 58.37(3) 6_556 6_556 ? 
Ca2 Eu1 Eu2 0.00(3) 6_556 6_556 ? 
Ge1 Eu2 Ge1 90.07(4) 5_556 5_566 ? 
Ge1 Eu2 Ge2 46.66(3) 5_556 5_556 ? 
Ge1 Eu2 Ge2 107.06(3) 5_566 5_556 ? 
Ge1 Eu2 Ge2 107.06(3) 5_556 5_566 ? 
Ge1 Eu2 Ge2 46.66(3) 5_566 5_566 ? 
Ge2 Eu2 Ge2 87.63(4) 5_556 5_566 ? 
Ge1 Eu2 Ge3 159.97(4) 5_556 5_666 ? 
Ge1 Eu2 Ge3 89.23(2) 5_566 5_666 ? 
Ge2 Eu2 Ge3 151.20(4) 5_556 5_666 ? 
Ge2 Eu2 Ge3 86.78(2) 5_566 5_666 ? 
Ge1 Eu2 Ge3 89.23(2) 5_556 5_656 ? 
Ge1 Eu2 Ge3 159.97(4) 5_566 5_656 ? 
Ge2 Eu2 Ge3 86.78(2) 5_556 5_656 ? 
Ge2 Eu2 Ge3 151.20(4) 5_566 5_656 ? 
Ge3 Eu2 Ge3 84.66(3) 5_666 5_656 ? 
Ge1 Eu2 In1 148.92(4) 5_556 5_566 ? 
Ge1 Eu2 In1 85.27(2) 5_566 5_566 ? 
Ge2 Eu2 In1 105.79(3) 5_556 5_566 ? 
Ge2 Eu2 In1 49.72(2) 5_566 5_566 ? 
Ge3 Eu2 In1 50.87(2) 5_666 5_566 ? 
Ge3 Eu2 In1 105.22(3) 5_656 5_566 ? 
Ge1 Eu2 In1 85.27(2) 5_556 5_556 ? 
Ge1 Eu2 In1 148.92(4) 5_566 5_556 ? 
Ge2 Eu2 In1 49.72(2) 5_556 5_556 ? 
Ge2 Eu2 In1 105.79(3) 5_566 5_556 ? 
Ge3 Eu2 In1 105.22(3) 5_666 5_556 ? 
Ge3 Eu2 In1 50.87(2) 5_656 5_556 ? 
In1 Eu2 In1 83.13(3) 5_566 5_556 ? 
Ge1 Eu2 In2 106.65(3) 5_556 2_564 ? 
Ge1 Eu2 In2 51.62(2) 5_566 2_564 ? 
Ge2 Eu2 In2 149.80(4) 5_556 2_564 ? 
Ge2 Eu2 In2 88.64(2) 5_566 2_564 ? 
Ge3 Eu2 In2 58.22(2) 5_666 2_564 ? 
Ge3 Eu2 In2 109.69(3) 5_656 2_564 ? 
In1 Eu2 In2 94.367(16) 5_566 2_564 ? 
In1 Eu2 In2 157.99(3) 5_556 2_564 ? 
Ge1 Eu2 In2 51.62(2) 5_556 2_554 ? 
Ge1 Eu2 In2 106.65(3) 5_566 2_554 ? 
Ge2 Eu2 In2 88.64(2) 5_556 2_554 ? 
Ge2 Eu2 In2 149.80(4) 5_566 2_554 ? 
Ge3 Eu2 In2 109.69(3) 5_666 2_554 ? 
Ge3 Eu2 In2 58.22(2) 5_656 2_554 ? 
In1 Eu2 In2 157.99(3) 5_566 2_554 ? 
In1 Eu2 In2 94.367(16) 5_556 2_554 ? 
In2 Eu2 In2 79.78(3) 2_564 2_554 ? 
Ge1 Eu2 In1 134.882(18) 5_556 . ? 
Ge1 Eu2 In1 134.882(18) 5_566 . ? 
Ge2 Eu2 In1 108.29(3) 5_556 . ? 
Ge2 Eu2 In1 108.29(3) 5_566 . ? 
Ge3 Eu2 In1 47.706(19) 5_666 . ? 
Ge3 Eu2 In1 47.706(19) 5_656 . ? 
In1 Eu2 In1 58.73(2) 5_566 . ? 
In1 Eu2 In1 58.73(2) 5_556 . ? 
In2 Eu2 In1 101.33(3) 2_564 . ? 
In2 Eu2 In1 101.33(3) 2_554 . ? 
Ge1 Eu2 Ca3 54.16(2) 5_556 6_556 ? 
Ge1 Eu2 Ca3 54.16(2) 5_566 6_556 ? 
Ge2 Eu2 Ca3 52.90(2) 5_556 6_556 ? 
Ge2 Eu2 Ca3 52.90(2) 5_566 6_556 ? 
Ge3 Eu2 Ca3 137.271(18) 5_666 6_556 ? 
Ge3 Eu2 Ca3 137.271(18) 5_656 6_556 ? 
In1 Eu2 Ca3 99.69(3) 5_566 6_556 ? 
In1 Eu2 Ca3 99.69(3) 5_556 6_556 ? 
In2 Eu2 Ca3 102.28(3) 2_564 6_556 ? 
In2 Eu2 Ca3 102.28(3) 2_554 6_556 ? 
In1 Eu2 Ca3 149.07(4) . 6_556 ? 
Ge1 Eu3 Ge1 92.81(5) 5_566 5_556 ? 
Ge1 Eu3 Ge2 156.06(6) 5_566 2_554 ? 
Ge1 Eu3 Ge2 82.87(2) 5_556 2_554 ? 
Ge1 Eu3 Ge2 82.87(2) 5_566 2_564 ? 
Ge1 Eu3 Ge2 156.06(6) 5_556 2_564 ? 
Ge2 Eu3 Ge2 91.56(5) 2_554 2_564 ? 
Ge1 Eu3 Ge1 83.528(19) 5_566 2_564 ? 
Ge1 Eu3 Ge1 155.60(5) 5_556 2_564 ? 
Ge2 Eu3 Ge1 109.70(5) 2_554 2_564 ? 
Ge2 Eu3 Ge1 47.50(3) 2_564 2_564 ? 
Ge1 Eu3 Ge1 155.60(5) 5_566 2_554 ? 
Ge1 Eu3 Ge1 83.528(19) 5_556 2_554 ? 
Ge2 Eu3 Ge1 47.50(3) 2_554 2_554 ? 
Ge2 Eu3 Ge1 109.70(5) 2_564 2_554 ? 
Ge1 Eu3 Ge1 89.91(5) 2_564 2_554 ? 
Ge1 Eu3 In2 52.03(3) 5_566 2_564 ? 
Ge1 Eu3 In2 108.18(4) 5_556 2_564 ? 
Ge2 Eu3 In2 151.36(5) 2_554 2_564 ? 
Ge2 Eu3 In2 87.71(2) 2_564 2_564 ? 
Ge1 Eu3 In2 51.31(3) 2_564 2_564 ? 
Ge1 Eu3 In2 106.24(4) 2_554 2_564 ? 
Ge1 Eu3 In2 108.18(4) 5_566 2_554 ? 
Ge1 Eu3 In2 52.03(3) 5_556 2_554 ? 
Ge2 Eu3 In2 87.71(2) 2_554 2_554 ? 
Ge2 Eu3 In2 151.36(5) 2_564 2_554 ? 
Ge1 Eu3 In2 106.24(4) 2_564 2_554 ? 
Ge1 Eu3 In2 51.31(3) 2_554 2_554 ? 
In2 Eu3 In2 79.62(3) 2_564 2_554 ? 
Ge1 Eu3 In2 107.24(5) 5_566 5_556 ? 
Ge1 Eu3 In2 51.48(3) 5_556 5_556 ? 
Ge2 Eu3 In2 52.27(3) 2_554 5_556 ? 
Ge2 Eu3 In2 107.31(5) 2_564 5_556 ? 
Ge1 Eu3 In2 152.26(5) 2_564 5_556 ? 
Ge1 Eu3 In2 89.34(2) 2_554 5_556 ? 
In2 Eu3 In2 153.60(5) 2_564 5_556 ? 
In2 Eu3 In2 94.774(19) 2_554 5_556 ? 
Ge1 Eu3 In2 51.48(3) 5_566 5_566 ? 
Ge1 Eu3 In2 107.24(5) 5_556 5_566 ? 
Ge2 Eu3 In2 107.31(5) 2_554 5_566 ? 
Ge2 Eu3 In2 52.27(3) 2_564 5_566 ? 
Ge1 Eu3 In2 89.34(2) 2_564 5_566 ? 
Ge1 Eu3 In2 152.26(5) 2_554 5_566 ? 
In2 Eu3 In2 94.774(19) 2_564 5_566 ? 
In2 Eu3 In2 153.60(5) 2_554 5_566 ? 
In2 Eu3 In2 78.78(3) 5_556 5_566 ? 
Ge1 Eu3 Eu2 133.58(2) 5_566 6_656 ? 
Ge1 Eu3 Eu2 133.58(2) 5_556 6_656 ? 
Ge2 Eu3 Eu2 55.65(3) 2_554 6_656 ? 
Ge2 Eu3 Eu2 55.65(3) 2_564 6_656 ? 
Ge1 Eu3 Eu2 54.05(3) 2_564 6_656 ? 
Ge1 Eu3 Eu2 54.05(3) 2_554 6_656 ? 
In2 Eu3 Eu2 101.79(3) 2_564 6_656 ? 
In2 Eu3 Eu2 101.79(3) 2_554 6_656 ? 
In2 Eu3 Eu2 104.61(4) 5_556 6_656 ? 
In2 Eu3 Eu2 104.61(4) 5_566 6_656 ? 
Ge1 Eu3 Ca2 133.58(2) 5_566 6_656 ? 
Ge1 Eu3 Ca2 133.58(2) 5_556 6_656 ? 
Ge2 Eu3 Ca2 55.65(3) 2_554 6_656 ? 
Ge2 Eu3 Ca2 55.65(3) 2_564 6_656 ? 
Ge1 Eu3 Ca2 54.05(3) 2_564 6_656 ? 
Ge1 Eu3 Ca2 54.05(3) 2_554 6_656 ? 
In2 Eu3 Ca2 101.79(3) 2_564 6_656 ? 
In2 Eu3 Ca2 101.79(3) 2_554 6_656 ? 
In2 Eu3 Ca2 104.61(4) 5_556 6_656 ? 
In2 Eu3 Ca2 104.61(4) 5_566 6_656 ? 
Eu2 Eu3 Ca2 0.00(2) 6_656 6_656 ? 
Ge2 In1 Ge3 116.22(3) . 5_656 ? 
Ge2 In1 Ge3 116.22(3) . 5_666 ? 
Ge3 In1 Ge3 105.88(4) 5_656 5_666 ? 
Ge2 In1 Ge3 105.56(4) . 1_455 ? 
Ge3 In1 Ge3 106.04(3) 5_656 1_455 ? 
Ge3 In1 Ge3 106.04(3) 5_666 1_455 ? 
Ge2 In1 Ca2 62.51(2) . 5_566 ? 
Ge3 In1 Ca2 167.09(3) 5_656 5_566 ? 
Ge3 In1 Ca2 85.17(2) 5_666 5_566 ? 
Ge3 In1 Ca2 63.67(2) 1_455 5_566 ? 
Ge2 In1 Eu2 62.51(2) . 5_566 ? 
Ge3 In1 Eu2 167.09(3) 5_656 5_566 ? 
Ge3 In1 Eu2 85.17(2) 5_666 5_566 ? 
Ge3 In1 Eu2 63.67(2) 1_455 5_566 ? 
Ca2 In1 Eu2 0.00(4) 5_566 5_566 ? 
Ge2 In1 Ca2 62.51(2) . 5_556 ? 
Ge3 In1 Ca2 85.17(2) 5_656 5_556 ? 
Ge3 In1 Ca2 167.09(3) 5_666 5_556 ? 
Ge3 In1 Ca2 63.67(2) 1_455 5_556 ? 
Ca2 In1 Ca2 83.13(3) 5_566 5_556 ? 
Eu2 In1 Ca2 83.13(3) 5_566 5_556 ? 
Ge2 In1 Eu2 62.51(2) . 5_556 ? 
Ge3 In1 Eu2 85.17(2) 5_656 5_556 ? 
Ge3 In1 Eu2 167.09(3) 5_666 5_556 ? 
Ge3 In1 Eu2 63.67(2) 1_455 5_556 ? 
Ca2 In1 Eu2 83.13(3) 5_566 5_556 ? 
Eu2 In1 Eu2 83.13(3) 5_566 5_556 ? 
Ca2 In1 Eu2 0.00(3) 5_556 5_556 ? 
Ge2 In1 Eu1 57.50(3) . 2_565 ? 
Ge3 In1 Eu1 121.03(3) 5_656 2_565 ? 
Ge3 In1 Eu1 60.23(3) 5_666 2_565 ? 
Ge3 In1 Eu1 132.84(2) 1_455 2_565 ? 
Ca2 In1 Eu1 70.05(3) 5_566 2_565 ? 
Eu2 In1 Eu1 70.05(3) 5_566 2_565 ? 
Ca2 In1 Eu1 120.02(3) 5_556 2_565 ? 
Eu2 In1 Eu1 120.02(3) 5_556 2_565 ? 
Ge2 In1 Ca1 57.50(3) . 2_565 ? 
Ge3 In1 Ca1 121.03(3) 5_656 2_565 ? 
Ge3 In1 Ca1 60.23(3) 5_666 2_565 ? 
Ge3 In1 Ca1 132.84(2) 1_455 2_565 ? 
Ca2 In1 Ca1 70.05(3) 5_566 2_565 ? 
Eu2 In1 Ca1 70.05(3) 5_566 2_565 ? 
Ca2 In1 Ca1 120.02(3) 5_556 2_565 ? 
Eu2 In1 Ca1 120.02(3) 5_556 2_565 ? 
Eu1 In1 Ca1 0.00(4) 2_565 2_565 ? 
Ge2 In1 Eu1 57.50(2) . 2 ? 
Ge3 In1 Eu1 60.23(3) 5_656 2 ? 
Ge3 In1 Eu1 121.03(3) 5_666 2 ? 
Ge3 In1 Eu1 132.84(2) 1_455 2 ? 
Ca2 In1 Eu1 120.02(3) 5_566 2 ? 
Eu2 In1 Eu1 120.02(3) 5_566 2 ? 
Ca2 In1 Eu1 70.05(3) 5_556 2 ? 
Eu2 In1 Eu1 70.05(3) 5_556 2 ? 
Eu1 In1 Eu1 78.70(3) 2_565 2 ? 
Ca1 In1 Eu1 78.70(3) 2_565 2 ? 
Ge2 In1 Ca1 57.50(2) . 2 ? 
Ge3 In1 Ca1 60.23(3) 5_656 2 ? 
Ge3 In1 Ca1 121.03(3) 5_666 2 ? 
Ge3 In1 Ca1 132.84(2) 1_455 2 ? 
Ca2 In1 Ca1 120.02(3) 5_566 2 ? 
Eu2 In1 Ca1 120.02(3) 5_566 2 ? 
Ca2 In1 Ca1 70.05(3) 5_556 2 ? 
Eu2 In1 Ca1 70.05(3) 5_556 2 ? 
Eu1 In1 Ca1 78.70(3) 2_565 2 ? 
Ca1 In1 Ca1 78.70(3) 2_565 2 ? 
Eu1 In1 Ca1 0.00(4) 2 2 ? 
Ge1 In2 Ge1 91.66(3) . 6_657 ? 
Ge1 In2 Ge2 89.27(4) . 6_557 ? 
Ge1 In2 Ge2 179.07(4) 6_657 6_557 ? 
Ge1 In2 Ca2 125.12(2) . 2_565 ? 
Ge1 In2 Ca2 58.40(2) 6_657 2_565 ? 
Ge2 In2 Ca2 120.99(3) 6_557 2_565 ? 
Ge1 In2 Eu2 125.12(2) . 2_565 ? 
Ge1 In2 Eu2 58.40(2) 6_657 2_565 ? 
Ge2 In2 Eu2 120.99(3) 6_557 2_565 ? 
Ca2 In2 Eu2 0.00(3) 2_565 2_565 ? 
Ge1 In2 Ca2 125.12(2) . 2 ? 
Ge1 In2 Ca2 58.40(2) 6_657 2 ? 
Ge2 In2 Ca2 120.99(3) 6_557 2 ? 
Ca2 In2 Ca2 79.78(3) 2_565 2 ? 
Eu2 In2 Ca2 79.78(3) 2_565 2 ? 
Ge1 In2 Eu2 125.12(2) . 2 ? 
Ge1 In2 Eu2 58.40(2) 6_657 2 ? 
Ge2 In2 Eu2 120.99(3) 6_557 2 ? 
Ca2 In2 Eu2 79.78(3) 2_565 2 ? 
Eu2 In2 Eu2 79.78(3) 2_565 2 ? 
Ca2 In2 Eu2 0.00(3) 2 2 ? 
Ge1 In2 Ca3 58.49(3) . 2 ? 
Ge1 In2 Ca3 56.79(3) 6_657 2 ? 
Ge2 In2 Ca3 123.80(3) 6_557 2 ? 
Ca2 In2 Ca3 115.18(3) 2_565 2 ? 
Eu2 In2 Ca3 115.18(3) 2_565 2 ? 
Ca2 In2 Ca3 66.69(3) 2 2 ? 
Eu2 In2 Ca3 66.69(3) 2 2 ? 
Ge1 In2 Eu3 58.49(3) . 2 ? 
Ge1 In2 Eu3 56.79(3) 6_657 2 ? 
Ge2 In2 Eu3 123.80(3) 6_557 2 ? 
Ca2 In2 Eu3 115.18(3) 2_565 2 ? 
Eu2 In2 Eu3 115.18(3) 2_565 2 ? 
Ca2 In2 Eu3 66.69(3) 2 2 ? 
Eu2 In2 Eu3 66.69(3) 2 2 ? 
Ca3 In2 Eu3 0.00(3) 2 2 ? 
Ge1 In2 Ca3 58.49(3) . 2_565 ? 
Ge1 In2 Ca3 56.79(3) 6_657 2_565 ? 
Ge2 In2 Ca3 123.80(3) 6_557 2_565 ? 
Ca2 In2 Ca3 66.69(3) 2_565 2_565 ? 
Eu2 In2 Ca3 66.69(3) 2_565 2_565 ? 
Ca2 In2 Ca3 115.18(3) 2 2_565 ? 
Eu2 In2 Ca3 115.18(3) 2 2_565 ? 
Ca3 In2 Ca3 79.62(3) 2 2_565 ? 
Eu3 In2 Ca3 79.62(3) 2 2_565 ? 
Ge1 In2 Eu3 58.49(3) . 2_565 ? 
Ge1 In2 Eu3 56.79(3) 6_657 2_565 ? 
Ge2 In2 Eu3 123.80(3) 6_557 2_565 ? 
Ca2 In2 Eu3 66.69(3) 2_565 2_565 ? 
Eu2 In2 Eu3 66.69(3) 2_565 2_565 ? 
Ca2 In2 Eu3 115.18(3) 2 2_565 ? 
Eu2 In2 Eu3 115.18(3) 2 2_565 ? 
Ca3 In2 Eu3 79.62(3) 2 2_565 ? 
Eu3 In2 Eu3 79.62(3) 2 2_565 ? 
Ca3 In2 Eu3 0.00(3) 2_565 2_565 ? 
Ge1 In2 Eu3 56.47(3) . 5_556 ? 
Ge1 In2 Eu3 123.80(3) 6_657 5_556 ? 
Ge2 In2 Eu3 56.81(3) 6_557 5_556 ? 
Ca2 In2 Eu3 177.67(4) 2_565 5_556 ? 
Eu2 In2 Eu3 177.67(4) 2_565 5_556 ? 
Ca2 In2 Eu3 100.68(2) 2 5_556 ? 
Eu2 In2 Eu3 100.68(2) 2 5_556 ? 
Ca3 In2 Eu3 67.003(17) 2 5_556 ? 
Eu3 In2 Eu3 67.003(17) 2 5_556 ? 
Ca3 In2 Eu3 114.95(2) 2_565 5_556 ? 
Eu3 In2 Eu3 114.95(2) 2_565 5_556 ? 
Ge2 Ge1 In2 115.24(5) . . ? 
Ge2 Ge1 In2 119.19(5) . 6_557 ? 
In2 Ge1 In2 125.57(4) . 6_557 ? 
Ge2 Ge1 Ca3 133.58(2) . 5_566 ? 
In2 Ge1 Ca3 72.06(3) . 5_566 ? 
In2 Ge1 Ca3 71.18(3) 6_557 5_566 ? 
Ge2 Ge1 Ca3 133.58(2) . 5_556 ? 
In2 Ge1 Ca3 72.06(3) . 5_556 ? 
In2 Ge1 Ca3 71.18(4) 6_557 5_556 ? 
Ca3 Ge1 Ca3 92.81(5) 5_566 5_556 ? 
Ge2 Ge1 Eu3 133.58(2) . 5_566 ? 
In2 Ge1 Eu3 72.06(3) . 5_566 ? 
In2 Ge1 Eu3 71.18(3) 6_557 5_566 ? 
Ca3 Ge1 Eu3 0.00(6) 5_566 5_566 ? 
Ca3 Ge1 Eu3 92.81(5) 5_556 5_566 ? 
Ge2 Ge1 Eu3 133.58(2) . 5_556 ? 
In2 Ge1 Eu3 72.06(3) . 5_556 ? 
In2 Ge1 Eu3 71.18(4) 6_557 5_556 ? 
Ca3 Ge1 Eu3 92.81(5) 5_566 5_556 ? 
Ca3 Ge1 Eu3 0.00(5) 5_556 5_556 ? 
Eu3 Ge1 Eu3 92.81(5) 5_566 5_556 ? 
Ge2 Ge1 Eu2 68.11(3) . 5_556 ? 
In2 Ge1 Eu2 134.589(19) . 5_556 ? 
In2 Ge1 Eu2 69.99(3) 6_557 5_556 ? 
Ca3 Ge1 Eu2 141.15(5) 5_566 5_556 ? 
Ca3 Ge1 Eu2 75.76(3) 5_556 5_556 ? 
Eu3 Ge1 Eu2 141.15(5) 5_566 5_556 ? 
Eu3 Ge1 Eu2 75.76(3) 5_556 5_556 ? 
Ge2 Ge1 Ca2 68.11(3) . 5_556 ? 
In2 Ge1 Ca2 134.589(19) . 5_556 ? 
In2 Ge1 Ca2 69.99(3) 6_557 5_556 ? 
Ca3 Ge1 Ca2 141.15(5) 5_566 5_556 ? 
Ca3 Ge1 Ca2 75.76(3) 5_556 5_556 ? 
Eu3 Ge1 Ca2 141.15(5) 5_566 5_556 ? 
Eu3 Ge1 Ca2 75.76(3) 5_556 5_556 ? 
Eu2 Ge1 Ca2 0.00(3) 5_556 5_556 ? 
Ge2 Ge1 Ca2 68.11(3) . 5_566 ? 
In2 Ge1 Ca2 134.589(19) . 5_566 ? 
In2 Ge1 Ca2 69.99(3) 6_557 5_566 ? 
Ca3 Ge1 Ca2 75.76(3) 5_566 5_566 ? 
Ca3 Ge1 Ca2 141.15(5) 5_556 5_566 ? 
Eu3 Ge1 Ca2 75.76(3) 5_566 5_566 ? 
Eu3 Ge1 Ca2 141.15(5) 5_556 5_566 ? 
Eu2 Ge1 Ca2 90.07(4) 5_556 5_566 ? 
Ca2 Ge1 Ca2 90.07(4) 5_556 5_566 ? 
Ge2 Ge1 Eu2 68.11(3) . 5_566 ? 
In2 Ge1 Eu2 134.589(19) . 5_566 ? 
In2 Ge1 Eu2 69.99(3) 6_557 5_566 ? 
Ca3 Ge1 Eu2 75.76(3) 5_566 5_566 ? 
Ca3 Ge1 Eu2 141.15(5) 5_556 5_566 ? 
Eu3 Ge1 Eu2 75.76(3) 5_566 5_566 ? 
Eu3 Ge1 Eu2 141.15(5) 5_556 5_566 ? 
Eu2 Ge1 Eu2 90.07(4) 5_556 5_566 ? 
Ca2 Ge1 Eu2 90.07(4) 5_556 5_566 ? 
Ca2 Ge1 Eu2 0.00(4) 5_566 5_566 ? 
Ge2 Ge1 Eu3 65.32(3) . 2_565 ? 
In2 Ge1 Eu3 70.19(3) . 2_565 ? 
In2 Ge1 Eu3 134.63(2) 6_557 2_565 ? 
Ca3 Ge1 Eu3 76.538(18) 5_566 2_565 ? 
Ca3 Ge1 Eu3 142.24(4) 5_556 2_565 ? 
Eu3 Ge1 Eu3 76.538(18) 5_566 2_565 ? 
Eu3 Ge1 Eu3 142.24(4) 5_556 2_565 ? 
Eu2 Ge1 Eu3 133.41(4) 5_556 2_565 ? 
Ca2 Ge1 Eu3 133.41(4) 5_556 2_565 ? 
Ca2 Ge1 Eu3 71.79(3) 5_566 2_565 ? 
Eu2 Ge1 Eu3 71.79(3) 5_566 2_565 ? 
Ge1 Ge2 In1 112.88(5) . . ? 
Ge1 Ge2 In2 118.27(4) . 6_657 ? 
In1 Ge2 In2 128.85(4) . 6_657 ? 
Ge1 Ge2 Eu1 133.87(2) . 2 ? 
In1 Ge2 Eu1 73.47(3) . 2 ? 
In2 Ge2 Eu1 71.71(3) 6_657 2 ? 
Ge1 Ge2 Eu1 133.87(2) . 2_565 ? 
In1 Ge2 Eu1 73.47(3) . 2_565 ? 
In2 Ge2 Eu1 71.71(3) 6_657 2_565 ? 
Eu1 Ge2 Eu1 92.22(4) 2 2_565 ? 
Ge1 Ge2 Ca1 133.87(2) . 2 ? 
In1 Ge2 Ca1 73.47(3) . 2 ? 
In2 Ge2 Ca1 71.71(3) 6_657 2 ? 
Eu1 Ge2 Ca1 0.00(4) 2 2 ? 
Eu1 Ge2 Ca1 92.22(4) 2_565 2 ? 
Ge1 Ge2 Ca1 133.87(2) . 2_565 ? 
In1 Ge2 Ca1 73.47(3) . 2_565 ? 
In2 Ge2 Ca1 71.71(3) 6_657 2_565 ? 
Eu1 Ge2 Ca1 92.22(4) 2 2_565 ? 
Eu1 Ge2 Ca1 0.00(4) 2_565 2_565 ? 
Ca1 Ge2 Ca1 92.22(4) 2 2_565 ? 
Ge1 Ge2 Ca3 67.18(4) . 2_565 ? 
In1 Ge2 Ca3 133.22(2) . 2_565 ? 
In2 Ge2 Ca3 70.92(3) 6_657 2_565 ? 
Eu1 Ge2 Ca3 142.64(5) 2 2_565 ? 
Eu1 Ge2 Ca3 76.22(3) 2_565 2_565 ? 
Ca1 Ge2 Ca3 142.64(5) 2 2_565 ? 
Ca1 Ge2 Ca3 76.22(3) 2_565 2_565 ? 
Ge1 Ge2 Eu3 67.18(4) . 2_565 ? 
In1 Ge2 Eu3 133.22(2) . 2_565 ? 
In2 Ge2 Eu3 70.92(3) 6_657 2_565 ? 
Eu1 Ge2 Eu3 142.64(5) 2 2_565 ? 
Eu1 Ge2 Eu3 76.22(3) 2_565 2_565 ? 
Ca1 Ge2 Eu3 142.64(5) 2 2_565 ? 
Ca1 Ge2 Eu3 76.22(3) 2_565 2_565 ? 
Ca3 Ge2 Eu3 0.00(4) 2_565 2_565 ? 
Ge1 Ge2 Ca3 67.18(4) . 2 ? 
In1 Ge2 Ca3 133.22(2) . 2 ? 
In2 Ge2 Ca3 70.92(3) 6_657 2 ? 
Eu1 Ge2 Ca3 76.22(3) 2 2 ? 
Eu1 Ge2 Ca3 142.64(5) 2_565 2 ? 
Ca1 Ge2 Ca3 76.22(3) 2 2 ? 
Ca1 Ge2 Ca3 142.64(5) 2_565 2 ? 
Ca3 Ge2 Ca3 91.56(5) 2_565 2 ? 
Eu3 Ge2 Ca3 91.56(5) 2_565 2 ? 
Ge1 Ge2 Eu3 67.18(4) . 2 ? 
In1 Ge2 Eu3 133.22(2) . 2 ? 
In2 Ge2 Eu3 70.92(3) 6_657 2 ? 
Eu1 Ge2 Eu3 76.22(3) 2 2 ? 
Eu1 Ge2 Eu3 142.64(5) 2_565 2 ? 
Ca1 Ge2 Eu3 76.22(3) 2 2 ? 
Ca1 Ge2 Eu3 142.64(5) 2_565 2 ? 
Ca3 Ge2 Eu3 91.56(5) 2_565 2 ? 
Eu3 Ge2 Eu3 91.56(5) 2_565 2 ? 
Ca3 Ge2 Eu3 0.0 2 2 ? 
Ge1 Ge2 Eu2 65.23(3) . 5_556 ? 
In1 Ge2 Eu2 67.77(3) . 5_556 ? 
In2 Ge2 Eu2 135.713(19) 6_657 5_556 ? 
Eu1 Ge2 Eu2 77.40(3) 2 5_556 ? 
Eu1 Ge2 Eu2 141.24(4) 2_565 5_556 ? 
Ca1 Ge2 Eu2 77.40(3) 2 5_556 ? 
Ca1 Ge2 Eu2 141.24(4) 2_565 5_556 ? 
Ca3 Ge2 Eu2 132.39(5) 2_565 5_556 ? 
Eu3 Ge2 Eu2 132.39(5) 2_565 5_556 ? 
Ca3 Ge2 Eu2 71.45(3) 2 5_556 ? 
Eu3 Ge2 Eu2 71.45(3) 2 5_556 ? 
In1 Ge3 In1 105.88(4) 5_656 5_666 ? 
In1 Ge3 In1 73.96(3) 5_656 1_655 ? 
In1 Ge3 In1 73.96(3) 5_666 1_655 ? 
In1 Ge3 Eu1 73.68(2) 5_656 2 ? 
In1 Ge3 Eu1 149.13(5) 5_666 2 ? 
In1 Ge3 Eu1 132.35(3) 1_655 2 ? 
In1 Ge3 Ca1 73.68(2) 5_656 2 ? 
In1 Ge3 Ca1 149.13(5) 5_666 2 ? 
In1 Ge3 Ca1 132.35(3) 1_655 2 ? 
Eu1 Ge3 Ca1 0.00(3) 2 2 ? 
In1 Ge3 Eu1 149.13(5) 5_656 2_565 ? 
In1 Ge3 Eu1 73.68(2) 5_666 2_565 ? 
In1 Ge3 Eu1 132.35(3) 1_655 2_565 ? 
Eu1 Ge3 Eu1 91.10(4) 2 2_565 ? 
Ca1 Ge3 Eu1 91.10(4) 2 2_565 ? 
In1 Ge3 Ca1 149.13(5) 5_656 2_565 ? 
In1 Ge3 Ca1 73.68(2) 5_666 2_565 ? 
In1 Ge3 Ca1 132.35(3) 1_655 2_565 ? 
Eu1 Ge3 Ca1 91.10(4) 2 2_565 ? 
Ca1 Ge3 Ca1 91.10(4) 2 2_565 ? 
Eu1 Ge3 Ca1 0.00(5) 2_565 2_565 ? 
In1 Ge3 Ca1 71.05(3) 5_656 6_656 ? 
In1 Ge3 Ca1 71.05(3) 5_666 6_656 ? 
In1 Ge3 Ca1 120.11(4) 1_655 6_656 ? 
Eu1 Ge3 Ca1 80.08(4) 2 6_656 ? 
Ca1 Ge3 Ca1 80.08(4) 2 6_656 ? 
Eu1 Ge3 Ca1 80.08(4) 2_565 6_656 ? 
Ca1 Ge3 Ca1 80.08(4) 2_565 6_656 ? 
In1 Ge3 Eu1 71.05(3) 5_656 6_656 ? 
In1 Ge3 Eu1 71.05(3) 5_666 6_656 ? 
In1 Ge3 Eu1 120.11(4) 1_655 6_656 ? 
Eu1 Ge3 Eu1 80.08(4) 2 6_656 ? 
Ca1 Ge3 Eu1 80.08(4) 2 6_656 ? 
Eu1 Ge3 Eu1 80.08(4) 2_565 6_656 ? 
Ca1 Ge3 Eu1 80.08(4) 2_565 6_656 ? 
Ca1 Ge3 Eu1 0.00(4) 6_656 6_656 ? 
In1 Ge3 Eu2 138.61(4) 5_656 5_666 ? 
In1 Ge3 Eu2 71.06(2) 5_666 5_666 ? 
In1 Ge3 Eu2 65.46(3) 1_655 5_666 ? 
Eu1 Ge3 Eu2 130.04(4) 2 5_666 ? 
Ca1 Ge3 Eu2 130.04(4) 2 5_666 ? 
Eu1 Ge3 Eu2 71.46(3) 2_565 5_666 ? 
Ca1 Ge3 Eu2 71.46(3) 2_565 5_666 ? 
Ca1 Ge3 Eu2 137.511(17) 6_656 5_666 ? 
Eu1 Ge3 Eu2 137.511(17) 6_656 5_666 ? 
In1 Ge3 Ca2 138.61(4) 5_656 5_666 ? 
In1 Ge3 Ca2 71.06(2) 5_666 5_666 ? 
In1 Ge3 Ca2 65.46(3) 1_655 5_666 ? 
Eu1 Ge3 Ca2 130.04(4) 2 5_666 ? 
Ca1 Ge3 Ca2 130.04(4) 2 5_666 ? 
Eu1 Ge3 Ca2 71.46(3) 2_565 5_666 ? 
Ca1 Ge3 Ca2 71.46(3) 2_565 5_666 ? 
Ca1 Ge3 Ca2 137.511(17) 6_656 5_666 ? 
Eu1 Ge3 Ca2 137.511(17) 6_656 5_666 ? 
Eu2 Ge3 Ca2 0.00(3) 5_666 5_666 ? 
In1 Ge3 Ca2 71.06(2) 5_656 5_656 ? 
In1 Ge3 Ca2 138.61(4) 5_666 5_656 ? 
In1 Ge3 Ca2 65.46(3) 1_655 5_656 ? 
Eu1 Ge3 Ca2 71.46(3) 2 5_656 ? 
Ca1 Ge3 Ca2 71.46(3) 2 5_656 ? 
Eu1 Ge3 Ca2 130.04(4) 2_565 5_656 ? 
Ca1 Ge3 Ca2 130.04(4) 2_565 5_656 ? 
Ca1 Ge3 Ca2 137.511(17) 6_656 5_656 ? 
Eu1 Ge3 Ca2 137.511(17) 6_656 5_656 ? 
Eu2 Ge3 Ca2 84.66(3) 5_666 5_656 ? 
Ca2 Ge3 Ca2 84.66(3) 5_666 5_656 ? 
 
_diffrn_measured_fraction_theta_max    1.000 
_diffrn_reflns_theta_full              25.00 
_diffrn_measured_fraction_theta_full   1.000 
_refine_diff_density_max    1.172 
_refine_diff_density_min   -1.737 
_refine_diff_density_rms    0.284 

###

 
data_Eu0.56Ca2.44In2Ge3
 
_audit_creation_method            SHELXL-97 
_chemical_name_systematic 
; 
 ? 
; 
_chemical_name_common             ? 
_chemical_melting_point           ? 
_chemical_formula_moiety          'Ca2.44 Eu0.56 Ge3 In2' 
_chemical_formula_sum 
 'Ca2.44 Eu0.56 Ge3 In2' 
_chemical_formula_weight          630.36 
 
loop_ 
 _atom_type_symbol 
 _atom_type_description 
 _atom_type_scat_dispersion_real 
 _atom_type_scat_dispersion_imag 
 _atom_type_scat_source 
 'Ca'  'Ca'   0.2262   0.3064 
 'International Tables Vol C Tables 4.2.6.8 and 6.1.1.4' 
 'Ge'  'Ge'   0.1547   1.8001 
 'International Tables Vol C Tables 4.2.6.8 and 6.1.1.4' 
 'In'  'In'  -0.7276   1.3100 
 'International Tables Vol C Tables 4.2.6.8 and 6.1.1.4' 
 'Eu'  'Eu'  -0.1578   3.6682 
 'International Tables Vol C Tables 4.2.6.8 and 6.1.1.4' 
 
_symmetry_cell_setting            Orthorhombic 
_symmetry_space_group_name_H-M    Pnma 
 
loop_ 
 _symmetry_equiv_pos_as_xyz 
 'x, y, z' 
 '-x+1/2, -y, z+1/2' 
 '-x, y+1/2, -z' 
 'x+1/2, -y+1/2, -z+1/2' 
 '-x, -y, -z' 
 'x-1/2, y, -z-1/2' 
 'x, -y-1/2, z' 
 '-x-1/2, y-1/2, z-1/2' 
 
_cell_length_a                    7.395(5) 
_cell_length_b                    4.462(2) 
_cell_length_c                    23.716(16) 
_cell_angle_alpha                 90.00 
_cell_angle_beta                  90.00 
_cell_angle_gamma                 90.00 
_cell_volume                      782.5(8) 
_cell_formula_units_Z             4 
_cell_measurement_temperature     200(2) 
_cell_measurement_reflns_used     1053 
_cell_measurement_theta_min       4.65 
_cell_measurement_theta_max       23.11 
 
_exptl_crystal_description        'needle' 
_exptl_crystal_colour             'silver' 
_exptl_crystal_size_max           0.045 
_exptl_crystal_size_mid           0.028 
_exptl_crystal_size_min           0.025 
_exptl_crystal_density_meas       ? 
_exptl_crystal_density_diffrn     5.345 
_exptl_crystal_density_method     'not measured' 
_exptl_crystal_F_000              1111 
_exptl_absorpt_coefficient_mu     23.054 
_exptl_absorpt_correction_type    'empirical' 
_exptl_absorpt_correction_T_min   0.0198 
_exptl_absorpt_correction_T_max   0.0432 
_exptl_absorpt_process_details    'SADABS' 
 
_exptl_special_details 
; 
 ? 
; 
 
_diffrn_ambient_temperature       200(2) 
_diffrn_radiation_wavelength      0.71073 
_diffrn_radiation_type            MoK\a 
_diffrn_radiation_source          'fine-focus sealed tube' 
_diffrn_radiation_monochromator   graphite 
_diffrn_measurement_device_type   'CCD area detector' 
_diffrn_measurement_method        'phi and omega scans' 
_diffrn_detector_area_resol_mean  ? 
_diffrn_standards_number          ? 
_diffrn_standards_interval_count  ? 
_diffrn_standards_interval_time   ? 
_diffrn_standards_decay_%         ? 
_diffrn_reflns_number             2194 
_diffrn_reflns_av_R_equivalents   0.1494 
_diffrn_reflns_av_sigmaI/netI     0.2028 
_diffrn_reflns_limit_h_min        -9 
_diffrn_reflns_limit_h_max        7 
_diffrn_reflns_limit_k_min        -5 
_diffrn_reflns_limit_k_max        5 
_diffrn_reflns_limit_l_min        -33 
_diffrn_reflns_limit_l_max        30 
_diffrn_reflns_theta_min          2.89 
_diffrn_reflns_theta_max          30.07 
_reflns_number_total              1053 
_reflns_number_gt                 486 
_reflns_threshold_expression      >2sigma(I) 
 
_computing_data_collection        'Bruker SMART' 
_computing_cell_refinement        'Bruker SMART' 
_computing_data_reduction         'Bruker SAINT' 
_computing_structure_solution     'SHELXS-97 (Sheldrick, 1990)' 
_computing_structure_refinement   'SHELXL-97 (Sheldrick, 1997)' 
_computing_molecular_graphics     'Bruker SHELXTL' 
_computing_publication_material   'Bruker SHEMXTL' 
 
_refine_special_details 
; 
 Refinement of F^2^ against ALL reflections.  The weighted R-factor wR and 
 goodness of fit S are based on F^2^, conventional R-factors R are based 
 on F, with F set to zero for negative F^2^. The threshold expression of 
 F^2^ > 2sigma(F^2^) is used only for calculating R-factors(gt) etc. and is 
 not relevant to the choice of reflections for refinement.  R-factors based 
 on F^2^ are statistically about twice as large as those based on F, and R- 
 factors based on ALL data will be even larger. 
; 
 
_refine_ls_structure_factor_coef  Fsqd  
_refine_ls_matrix_type            full 
_refine_ls_weighting_scheme       calc  
_refine_ls_weighting_details 
 'calc w=1/[\s^2^(Fo^2^)+(0.0124P)^2^+0.0000P] where P=(Fo^2^+2Fc^2^)/3' 
_atom_sites_solution_primary      direct 
_atom_sites_solution_secondary    difmap 
_atom_sites_solution_hydrogens    . 
_refine_ls_hydrogen_treatment     . 
_refine_ls_extinction_method      none 
_refine_ls_extinction_coef        ? 
_refine_ls_number_reflns          1053 
_refine_ls_number_parameters      52 
_refine_ls_number_restraints      0 
_refine_ls_R_factor_all           0.1783 
_refine_ls_R_factor_gt            0.0733 
_refine_ls_wR_factor_ref          0.1488 
_refine_ls_wR_factor_gt           0.1090 
_refine_ls_goodness_of_fit_ref    0.945 
_refine_ls_restrained_S_all       0.945 
_refine_ls_shift/su_max           0.000 
_refine_ls_shift/su_mean          0.000 
 
loop_ 
 _atom_site_label 
 _atom_site_type_symbol 
 _atom_site_fract_x 
 _atom_site_fract_y 
 _atom_site_fract_z 
 _atom_site_U_iso_or_equiv 
 _atom_site_adp_type 
 _atom_site_occupancy 
 _atom_site_symmetry_multiplicity 
 _atom_site_calc_flag 
 _atom_site_refinement_flags 
 _atom_site_disorder_assembly 
 _atom_site_disorder_group 
Eu1 Eu 0.0113(8) 0.2500 0.0719(2) 0.0116(18) Uani 0.145(10) 2 d SP . . 
Ca1 Ca 0.0113(8) 0.2500 0.0719(2) 0.0116(18) Uani 0.855(10) 2 d SP . . 
Eu2 Eu 0.0238(6) 0.2500 0.38137(16) 0.0107(14) Uani 0.282(10) 2 d SP . . 
Ca2 Ca 0.0238(6) 0.2500 0.38137(16) 0.0107(14) Uani 0.718(10) 2 d SP . . 
Eu3 Eu 0.1642(8) 0.2500 0.2268(2) 0.0145(19) Uani 0.128(10) 2 d SP . . 
Ca3 Ca 0.1642(8) 0.2500 0.2268(2) 0.0145(19) Uani 0.872(10) 2 d SP . . 
In1 In 0.1500(4) 0.2500 0.52718(11) 0.0113(6) Uani 1 2 d S . . 
In2 In 0.1631(4) 0.2500 0.82573(12) 0.0160(7) Uani 1 2 d S . . 
Ge1 Ge 0.0380(6) 0.2500 0.71011(15) 0.0117(9) Uani 1 2 d S . . 
Ge2 Ge 0.2845(6) 0.2500 0.63625(15) 0.0113(9) Uani 1 2 d S . . 
Ge3 Ge 0.7647(6) 0.2500 0.53891(15) 0.0114(9) Uani 1 2 d S . . 
 
loop_ 
 _atom_site_aniso_label 
 _atom_site_aniso_U_11 
 _atom_site_aniso_U_22 
 _atom_site_aniso_U_33 
 _atom_site_aniso_U_23 
 _atom_site_aniso_U_13 
 _atom_site_aniso_U_12 
Eu1 0.006(3) 0.019(3) 0.009(2) 0.000 0.000(2) 0.000 
Ca1 0.006(3) 0.019(3) 0.009(2) 0.000 0.000(2) 0.000 
Eu2 0.007(3) 0.013(2) 0.012(2) 0.000 0.0014(18) 0.000 
Ca2 0.007(3) 0.013(2) 0.012(2) 0.000 0.0014(18) 0.000 
Eu3 0.016(4) 0.012(3) 0.016(3) 0.000 0.000(3) 0.000 
Ca3 0.016(4) 0.012(3) 0.016(3) 0.000 0.000(3) 0.000 
In1 0.0093(17) 0.0155(14) 0.0091(11) 0.000 -0.0004(12) 0.000 
In2 0.0091(16) 0.0250(15) 0.0138(12) 0.000 0.0007(12) 0.000 
Ge1 0.013(3) 0.0122(19) 0.0096(18) 0.000 0.0025(19) 0.000 
Ge2 0.013(3) 0.013(2) 0.0077(17) 0.000 -0.0021(18) 0.000 
Ge3 0.006(2) 0.017(2) 0.0110(18) 0.000 -0.0013(17) 0.000 
 
_geom_special_details 
; 
 All esds (except the esd in the dihedral angle between two l.s. planes) 
 are estimated using the full covariance matrix.  The cell esds are taken 
 into account individually in the estimation of esds in distances, angles 
 and torsion angles; correlations between esds in cell parameters are only 
 used when they are defined by crystal symmetry.  An approximate (isotropic) 
 treatment of cell esds is used for estimating esds involving l.s. planes. 
; 
 
loop_ 
 _geom_bond_atom_site_label_1 
 _geom_bond_atom_site_label_2 
 _geom_bond_distance 
 _geom_bond_site_symmetry_2 
 _geom_bond_publ_flag 
Eu1 Ge2 3.096(5) 2_564 ? 
Eu1 Ge2 3.096(5) 2_554 ? 
Eu1 Ge3 3.123(5) 2_554 ? 
Eu1 Ge3 3.123(5) 2_564 ? 
Eu1 Ge3 3.228(6) 6_556 ? 
Eu1 In1 3.519(5) 2_564 ? 
Eu1 In1 3.519(5) 2_554 ? 
Eu1 In2 3.540(5) 5_566 ? 
Eu1 In2 3.540(5) 5_556 ? 
Eu1 In1 3.559(6) 6_556 ? 
Eu1 Ca2 3.771(8) 6_556 ? 
Eu1 Eu2 3.771(8) 6_556 ? 
Eu2 Ge1 3.145(4) 5_556 ? 
Eu2 Ge1 3.145(4) 5_566 ? 
Eu2 Ge2 3.217(5) 5_556 ? 
Eu2 Ge2 3.217(5) 5_566 ? 
Eu2 Ge3 3.316(4) 5_666 ? 
Eu2 Ge3 3.316(4) 5_656 ? 
Eu2 In1 3.367(4) 5_566 ? 
Eu2 In1 3.367(4) 5_556 ? 
Eu2 In2 3.475(4) 2_564 ? 
Eu2 In2 3.475(4) 2_554 ? 
Eu2 In1 3.582(5) . ? 
Eu2 Ca3 3.695(7) 6_556 ? 
Eu3 Ge1 3.075(5) 5_566 ? 
Eu3 Ge1 3.075(5) 5_556 ? 
Eu3 Ge2 3.119(5) 2_554 ? 
Eu3 Ge2 3.119(5) 2_564 ? 
Eu3 Ge1 3.160(6) 2_564 ? 
Eu3 Ge1 3.160(6) 2_554 ? 
Eu3 In2 3.481(5) 2_564 ? 
Eu3 In2 3.481(5) 2_554 ? 
Eu3 In2 3.519(6) 5_556 ? 
Eu3 In2 3.519(6) 5_566 ? 
Eu3 Eu2 3.695(7) 6_656 ? 
Eu3 Ca2 3.695(7) 6_656 ? 
In1 Ge2 2.771(5) . ? 
In1 Ge3 2.799(3) 5_656 ? 
In1 Ge3 2.799(3) 5_666 ? 
In1 Ge3 2.863(6) 1_455 ? 
In1 Ca2 3.367(4) 5_566 ? 
In1 Eu2 3.367(4) 5_566 ? 
In1 Ca2 3.367(4) 5_556 ? 
In1 Eu2 3.367(4) 5_556 ? 
In1 Eu1 3.519(5) 2_565 ? 
In1 Ca1 3.519(5) 2_565 ? 
In1 Eu1 3.519(5) 2 ? 
In1 Ca1 3.519(5) 2 ? 
In2 Ge1 2.894(5) . ? 
In2 Ge1 2.900(6) 6_657 ? 
In2 Ge2 2.942(6) 6_557 ? 
In2 Ca2 3.475(4) 2_565 ? 
In2 Eu2 3.475(4) 2_565 ? 
In2 Ca2 3.475(4) 2 ? 
In2 Eu2 3.475(4) 2 ? 
In2 Ca3 3.481(5) 2 ? 
In2 Eu3 3.481(5) 2 ? 
In2 Ca3 3.481(5) 2_565 ? 
In2 Eu3 3.481(5) 2_565 ? 
In2 Eu3 3.519(6) 5_556 ? 
Ge1 Ge2 2.528(6) . ? 
Ge1 In2 2.900(6) 6_557 ? 
Ge1 Ca3 3.075(5) 5_566 ? 
Ge1 Ca3 3.075(5) 5_556 ? 
Ge1 Eu3 3.075(5) 5_566 ? 
Ge1 Eu3 3.075(5) 5_556 ? 
Ge1 Eu2 3.145(4) 5_556 ? 
Ge1 Ca2 3.145(4) 5_556 ? 
Ge1 Ca2 3.145(4) 5_566 ? 
Ge1 Eu2 3.145(4) 5_566 ? 
Ge1 Eu3 3.160(6) 2_565 ? 
Ge2 In2 2.942(6) 6_657 ? 
Ge2 Eu1 3.096(5) 2 ? 
Ge2 Eu1 3.096(5) 2_565 ? 
Ge2 Ca1 3.096(5) 2 ? 
Ge2 Ca1 3.096(5) 2_565 ? 
Ge2 Ca3 3.119(5) 2_565 ? 
Ge2 Eu3 3.119(5) 2_565 ? 
Ge2 Ca3 3.119(5) 2 ? 
Ge2 Eu3 3.119(5) 2 ? 
Ge2 Eu2 3.217(5) 5_556 ? 
Ge3 In1 2.799(3) 5_656 ? 
Ge3 In1 2.799(3) 5_666 ? 
Ge3 In1 2.863(6) 1_655 ? 
Ge3 Eu1 3.123(5) 2 ? 
Ge3 Ca1 3.123(5) 2 ? 
Ge3 Eu1 3.123(5) 2_565 ? 
Ge3 Ca1 3.123(5) 2_565 ? 
Ge3 Ca1 3.228(6) 6_656 ? 
Ge3 Eu1 3.228(6) 6_656 ? 
Ge3 Eu2 3.316(4) 5_666 ? 
Ge3 Ca2 3.316(4) 5_666 ? 
Ge3 Ca2 3.316(4) 5_656 ? 
 
loop_ 
 _geom_angle_atom_site_label_1 
 _geom_angle_atom_site_label_2 
 _geom_angle_atom_site_label_3 
 _geom_angle 
 _geom_angle_site_symmetry_1 
 _geom_angle_site_symmetry_3 
 _geom_angle_publ_flag 
Ge2 Eu1 Ge2 92.21(18) 2_564 2_554 ? 
Ge2 Eu1 Ge3 163.1(2) 2_564 2_554 ? 
Ge2 Eu1 Ge3 85.85(9) 2_554 2_554 ? 
Ge2 Eu1 Ge3 85.85(9) 2_564 2_564 ? 
Ge2 Eu1 Ge3 163.1(2) 2_554 2_564 ? 
Ge3 Eu1 Ge3 91.2(2) 2_554 2_564 ? 
Ge2 Eu1 Ge3 96.77(15) 2_564 6_556 ? 
Ge2 Eu1 Ge3 96.77(15) 2_554 6_556 ? 
Ge3 Eu1 Ge3 100.08(14) 2_554 6_556 ? 
Ge3 Eu1 Ge3 100.08(14) 2_564 6_556 ? 
Ge2 Eu1 In1 49.03(10) 2_564 2_564 ? 
Ge2 Eu1 In1 104.96(18) 2_554 2_564 ? 
Ge3 Eu1 In1 147.40(18) 2_554 2_564 ? 
Ge3 Eu1 In1 86.37(10) 2_564 2_564 ? 
Ge3 Eu1 In1 48.78(9) 6_556 2_564 ? 
Ge2 Eu1 In1 104.96(18) 2_564 2_554 ? 
Ge2 Eu1 In1 49.03(10) 2_554 2_554 ? 
Ge3 Eu1 In1 86.37(10) 2_554 2_554 ? 
Ge3 Eu1 In1 147.40(18) 2_564 2_554 ? 
Ge3 Eu1 In1 48.78(9) 6_556 2_554 ? 
In1 Eu1 In1 78.70(13) 2_564 2_554 ? 
Ge2 Eu1 In2 52.11(11) 2_564 5_566 ? 
Ge2 Eu1 In2 107.11(16) 2_554 5_566 ? 
Ge3 Eu1 In2 112.59(18) 2_554 5_566 ? 
Ge3 Eu1 In2 58.92(10) 2_564 5_566 ? 
Ge3 Eu1 In2 140.33(7) 6_556 5_566 ? 
In1 Eu1 In2 93.82(7) 2_564 5_566 ? 
In1 Eu1 In2 149.98(17) 2_554 5_566 ? 
Ge2 Eu1 In2 107.11(16) 2_564 5_556 ? 
Ge2 Eu1 In2 52.11(11) 2_554 5_556 ? 
Ge3 Eu1 In2 58.92(10) 2_554 5_556 ? 
Ge3 Eu1 In2 112.59(18) 2_564 5_556 ? 
Ge3 Eu1 In2 140.33(7) 6_556 5_556 ? 
In1 Eu1 In2 149.98(17) 2_564 5_556 ? 
In1 Eu1 In2 93.82(7) 2_554 5_556 ? 
In2 Eu1 In2 78.14(12) 5_566 5_556 ? 
Ge2 Eu1 In1 133.77(9) 2_564 6_556 ? 
Ge2 Eu1 In1 133.77(9) 2_554 6_556 ? 
Ge3 Eu1 In1 48.99(10) 2_554 6_556 ? 
Ge3 Eu1 In1 48.99(10) 2_564 6_556 ? 
Ge3 Eu1 In1 84.14(15) 6_556 6_556 ? 
In1 Eu1 In1 109.59(12) 2_564 6_556 ? 
In1 Eu1 In1 109.59(12) 2_554 6_556 ? 
In2 Eu1 In1 100.33(14) 5_566 6_556 ? 
In2 Eu1 In1 100.33(14) 5_556 6_556 ? 
Ge2 Eu1 Ca2 108.77(14) 2_564 6_556 ? 
Ge2 Eu1 Ca2 108.77(14) 2_554 6_556 ? 
Ge3 Eu1 Ca2 56.57(12) 2_554 6_556 ? 
Ge3 Eu1 Ca2 56.57(12) 2_564 6_556 ? 
Ge3 Eu1 Ca2 142.56(18) 6_556 6_556 ? 
In1 Eu1 Ca2 140.28(7) 2_564 6_556 ? 
In1 Eu1 Ca2 140.28(7) 2_554 6_556 ? 
In2 Eu1 Ca2 56.66(10) 5_566 6_556 ? 
In2 Eu1 Ca2 56.66(10) 5_556 6_556 ? 
In1 Eu1 Ca2 58.42(12) 6_556 6_556 ? 
Ge2 Eu1 Eu2 108.77(14) 2_564 6_556 ? 
Ge2 Eu1 Eu2 108.77(14) 2_554 6_556 ? 
Ge3 Eu1 Eu2 56.57(12) 2_554 6_556 ? 
Ge3 Eu1 Eu2 56.57(12) 2_564 6_556 ? 
Ge3 Eu1 Eu2 142.56(18) 6_556 6_556 ? 
In1 Eu1 Eu2 140.28(7) 2_564 6_556 ? 
In1 Eu1 Eu2 140.28(7) 2_554 6_556 ? 
In2 Eu1 Eu2 56.66(10) 5_566 6_556 ? 
In2 Eu1 Eu2 56.66(10) 5_556 6_556 ? 
In1 Eu1 Eu2 58.42(12) 6_556 6_556 ? 
Ca2 Eu1 Eu2 0.00(12) 6_556 6_556 ? 
Ge1 Eu2 Ge1 90.36(14) 5_556 5_566 ? 
Ge1 Eu2 Ge2 46.80(10) 5_556 5_556 ? 
Ge1 Eu2 Ge2 107.41(15) 5_566 5_556 ? 
Ge1 Eu2 Ge2 107.41(15) 5_556 5_566 ? 
Ge1 Eu2 Ge2 46.80(10) 5_566 5_566 ? 
Ge2 Eu2 Ge2 87.81(17) 5_556 5_566 ? 
Ge1 Eu2 Ge3 159.89(19) 5_556 5_666 ? 
Ge1 Eu2 Ge3 89.12(8) 5_566 5_666 ? 
Ge2 Eu2 Ge3 151.02(16) 5_556 5_666 ? 
Ge2 Eu2 Ge3 86.66(9) 5_566 5_666 ? 
Ge1 Eu2 Ge3 89.12(8) 5_556 5_656 ? 
Ge1 Eu2 Ge3 159.89(19) 5_566 5_656 ? 
Ge2 Eu2 Ge3 86.66(9) 5_556 5_656 ? 
Ge2 Eu2 Ge3 151.02(16) 5_566 5_656 ? 
Ge3 Eu2 Ge3 84.56(14) 5_666 5_656 ? 
Ge1 Eu2 In1 149.19(18) 5_556 5_566 ? 
Ge1 Eu2 In1 85.34(9) 5_566 5_566 ? 
Ge2 Eu2 In1 105.82(15) 5_556 5_566 ? 
Ge2 Eu2 In1 49.72(9) 5_566 5_566 ? 
Ge3 Eu2 In1 50.72(10) 5_666 5_566 ? 
Ge3 Eu2 In1 104.98(13) 5_656 5_566 ? 
Ge1 Eu2 In1 85.34(9) 5_556 5_556 ? 
Ge1 Eu2 In1 149.19(18) 5_566 5_556 ? 
Ge2 Eu2 In1 49.72(9) 5_556 5_556 ? 
Ge2 Eu2 In1 105.82(15) 5_566 5_556 ? 
Ge3 Eu2 In1 104.98(13) 5_666 5_556 ? 
Ge3 Eu2 In1 50.72(10) 5_656 5_556 ? 
In1 Eu2 In1 83.01(11) 5_566 5_556 ? 
Ge1 Eu2 In2 106.88(13) 5_556 2_564 ? 
Ge1 Eu2 In2 51.66(11) 5_566 2_564 ? 
Ge2 Eu2 In2 150.22(14) 5_556 2_564 ? 
Ge2 Eu2 In2 88.72(9) 5_566 2_564 ? 
Ge3 Eu2 In2 58.03(10) 5_666 2_564 ? 
Ge3 Eu2 In2 109.52(16) 5_656 2_564 ? 
In1 Eu2 In2 94.22(7) 5_566 2_564 ? 
In1 Eu2 In2 157.57(16) 5_556 2_564 ? 
Ge1 Eu2 In2 51.66(11) 5_556 2_554 ? 
Ge1 Eu2 In2 106.88(13) 5_566 2_554 ? 
Ge2 Eu2 In2 88.72(9) 5_556 2_554 ? 
Ge2 Eu2 In2 150.22(14) 5_566 2_554 ? 
Ge3 Eu2 In2 109.52(16) 5_666 2_554 ? 
Ge3 Eu2 In2 58.03(10) 5_656 2_554 ? 
In1 Eu2 In2 157.57(16) 5_566 2_554 ? 
In1 Eu2 In2 94.22(7) 5_556 2_554 ? 
In2 Eu2 In2 79.88(12) 2_564 2_554 ? 
Ge1 Eu2 In1 134.73(7) 5_556 . ? 
Ge1 Eu2 In1 134.73(7) 5_566 . ? 
Ge2 Eu2 In1 108.05(11) 5_556 . ? 
Ge2 Eu2 In1 108.05(11) 5_566 . ? 
Ge3 Eu2 In1 47.68(7) 5_666 . ? 
Ge3 Eu2 In1 47.68(7) 5_656 . ? 
In1 Eu2 In1 58.49(9) 5_566 . ? 
In1 Eu2 In1 58.49(9) 5_556 . ? 
In2 Eu2 In1 101.14(11) 2_564 . ? 
In2 Eu2 In1 101.14(11) 2_554 . ? 
Ge1 Eu2 Ca3 54.31(11) 5_556 6_556 ? 
Ge1 Eu2 Ca3 54.31(11) 5_566 6_556 ? 
Ge2 Eu2 Ca3 53.11(10) 5_556 6_556 ? 
Ge2 Eu2 Ca3 53.11(10) 5_566 6_556 ? 
Ge3 Eu2 Ca3 137.32(8) 5_666 6_556 ? 
Ge3 Eu2 Ca3 137.32(8) 5_656 6_556 ? 
In1 Eu2 Ca3 99.92(13) 5_566 6_556 ? 
In1 Eu2 Ca3 99.92(13) 5_556 6_556 ? 
In2 Eu2 Ca3 102.48(12) 2_564 6_556 ? 
In2 Eu2 Ca3 102.48(12) 2_554 6_556 ? 
In1 Eu2 Ca3 149.04(16) . 6_556 ? 
Ge1 Eu3 Ge1 93.0(2) 5_566 5_556 ? 
Ge1 Eu3 Ge2 156.0(3) 5_566 2_554 ? 
Ge1 Eu3 Ge2 82.84(10) 5_556 2_554 ? 
Ge1 Eu3 Ge2 82.84(10) 5_566 2_564 ? 
Ge1 Eu3 Ge2 156.0(3) 5_556 2_564 ? 
Ge2 Eu3 Ge2 91.33(18) 2_554 2_564 ? 
Ge1 Eu3 Ge1 83.54(7) 5_566 2_564 ? 
Ge1 Eu3 Ge1 155.8(2) 5_556 2_564 ? 
Ge2 Eu3 Ge1 109.5(2) 2_554 2_564 ? 
Ge2 Eu3 Ge1 47.47(11) 2_564 2_564 ? 
Ge1 Eu3 Ge1 155.8(2) 5_566 2_554 ? 
Ge1 Eu3 Ge1 83.54(7) 5_556 2_554 ? 
Ge2 Eu3 Ge1 47.47(11) 2_554 2_554 ? 
Ge2 Eu3 Ge1 109.5(2) 2_564 2_554 ? 
Ge1 Eu3 Ge1 89.8(2) 2_564 2_554 ? 
Ge1 Eu3 In2 52.05(12) 5_566 2_564 ? 
Ge1 Eu3 In2 108.37(17) 5_556 2_564 ? 
Ge2 Eu3 In2 151.4(2) 2_554 2_564 ? 
Ge2 Eu3 In2 87.76(10) 2_564 2_564 ? 
Ge1 Eu3 In2 51.39(10) 2_564 2_564 ? 
Ge1 Eu3 In2 106.32(19) 2_554 2_564 ? 
Ge1 Eu3 In2 108.37(17) 5_566 2_554 ? 
Ge1 Eu3 In2 52.05(12) 5_556 2_554 ? 
Ge2 Eu3 In2 87.76(10) 2_554 2_554 ? 
Ge2 Eu3 In2 151.4(2) 2_564 2_554 ? 
Ge1 Eu3 In2 106.32(19) 2_564 2_554 ? 
Ge1 Eu3 In2 51.39(10) 2_554 2_554 ? 
In2 Eu3 In2 79.71(14) 2_564 2_554 ? 
Ge1 Eu3 In2 107.3(2) 5_566 5_556 ? 
Ge1 Eu3 In2 51.53(11) 5_556 5_556 ? 
Ge2 Eu3 In2 52.19(11) 2_554 5_556 ? 
Ge2 Eu3 In2 107.09(18) 2_564 5_556 ? 
Ge1 Eu3 In2 152.0(2) 2_564 5_556 ? 
Ge1 Eu3 In2 89.29(10) 2_554 5_556 ? 
In2 Eu3 In2 153.8(2) 2_564 5_556 ? 
In2 Eu3 In2 94.85(8) 2_554 5_556 ? 
Ge1 Eu3 In2 51.53(11) 5_566 5_566 ? 
Ge1 Eu3 In2 107.3(2) 5_556 5_566 ? 
Ge2 Eu3 In2 107.09(18) 2_554 5_566 ? 
Ge2 Eu3 In2 52.19(11) 2_564 5_566 ? 
Ge1 Eu3 In2 89.29(10) 2_564 5_566 ? 
Ge1 Eu3 In2 152.0(2) 2_554 5_566 ? 
In2 Eu3 In2 94.85(8) 2_564 5_566 ? 
In2 Eu3 In2 153.8(2) 2_554 5_566 ? 
In2 Eu3 In2 78.69(15) 5_556 5_566 ? 
Ge1 Eu3 Eu2 133.47(10) 5_566 6_656 ? 
Ge1 Eu3 Eu2 133.47(10) 5_556 6_656 ? 
Ge2 Eu3 Eu2 55.58(12) 2_554 6_656 ? 
Ge2 Eu3 Eu2 55.58(12) 2_564 6_656 ? 
Ge1 Eu3 Eu2 53.95(12) 2_564 6_656 ? 
Ge1 Eu3 Eu2 53.95(12) 2_554 6_656 ? 
In2 Eu3 Eu2 101.76(16) 2_564 6_656 ? 
In2 Eu3 Eu2 101.76(16) 2_554 6_656 ? 
In2 Eu3 Eu2 104.46(14) 5_556 6_656 ? 
In2 Eu3 Eu2 104.46(14) 5_566 6_656 ? 
Ge1 Eu3 Ca2 133.47(10) 5_566 6_656 ? 
Ge1 Eu3 Ca2 133.47(10) 5_556 6_656 ? 
Ge2 Eu3 Ca2 55.58(12) 2_554 6_656 ? 
Ge2 Eu3 Ca2 55.58(12) 2_564 6_656 ? 
Ge1 Eu3 Ca2 53.95(12) 2_564 6_656 ? 
Ge1 Eu3 Ca2 53.95(12) 2_554 6_656 ? 
In2 Eu3 Ca2 101.76(16) 2_564 6_656 ? 
In2 Eu3 Ca2 101.76(16) 2_554 6_656 ? 
In2 Eu3 Ca2 104.46(14) 5_556 6_656 ? 
In2 Eu3 Ca2 104.46(14) 5_566 6_656 ? 
Eu2 Eu3 Ca2 0.00(8) 6_656 6_656 ? 
Ge2 In1 Ge3 116.22(11) . 5_656 ? 
Ge2 In1 Ge3 116.22(11) . 5_666 ? 
Ge3 In1 Ge3 105.72(16) 5_656 5_666 ? 
Ge2 In1 Ge3 105.45(14) . 1_455 ? 
Ge3 In1 Ge3 106.20(11) 5_656 1_455 ? 
Ge3 In1 Ge3 106.20(11) 5_666 1_455 ? 
Ge2 In1 Ca2 62.33(11) . 5_566 ? 
Ge3 In1 Ca2 167.21(13) 5_656 5_566 ? 
Ge3 In1 Ca2 85.33(9) 5_666 5_566 ? 
Ge3 In1 Ca2 63.73(10) 1_455 5_566 ? 
Ge2 In1 Eu2 62.33(11) . 5_566 ? 
Ge3 In1 Eu2 167.21(13) 5_656 5_566 ? 
Ge3 In1 Eu2 85.33(9) 5_666 5_566 ? 
Ge3 In1 Eu2 63.73(10) 1_455 5_566 ? 
Ca2 In1 Eu2 0.00(17) 5_566 5_566 ? 
Ge2 In1 Ca2 62.33(11) . 5_556 ? 
Ge3 In1 Ca2 85.33(9) 5_656 5_556 ? 
Ge3 In1 Ca2 167.21(12) 5_666 5_556 ? 
Ge3 In1 Ca2 63.73(10) 1_455 5_556 ? 
Ca2 In1 Ca2 83.01(12) 5_566 5_556 ? 
Eu2 In1 Ca2 83.01(12) 5_566 5_556 ? 
Ge2 In1 Eu2 62.33(11) . 5_556 ? 
Ge3 In1 Eu2 85.33(9) 5_656 5_556 ? 
Ge3 In1 Eu2 167.21(12) 5_666 5_556 ? 
Ge3 In1 Eu2 63.73(10) 1_455 5_556 ? 
Ca2 In1 Eu2 83.01(12) 5_566 5_556 ? 
Eu2 In1 Eu2 83.01(12) 5_566 5_556 ? 
Ca2 In1 Eu2 0.00(14) 5_556 5_556 ? 
Ge2 In1 Eu1 57.51(10) . 2_565 ? 
Ge3 In1 Eu1 120.92(15) 5_656 2_565 ? 
Ge3 In1 Eu1 60.19(11) 5_666 2_565 ? 
Ge3 In1 Eu1 132.79(10) 1_455 2_565 ? 
Ca2 In1 Eu1 69.96(12) 5_566 2_565 ? 
Eu2 In1 Eu1 69.96(12) 5_566 2_565 ? 
Ca2 In1 Eu1 119.85(12) 5_556 2_565 ? 
Eu2 In1 Eu1 119.85(12) 5_556 2_565 ? 
Ge2 In1 Ca1 57.51(10) . 2_565 ? 
Ge3 In1 Ca1 120.92(15) 5_656 2_565 ? 
Ge3 In1 Ca1 60.19(11) 5_666 2_565 ? 
Ge3 In1 Ca1 132.79(10) 1_455 2_565 ? 
Ca2 In1 Ca1 69.96(12) 5_566 2_565 ? 
Eu2 In1 Ca1 69.96(12) 5_566 2_565 ? 
Ca2 In1 Ca1 119.85(12) 5_556 2_565 ? 
Eu2 In1 Ca1 119.85(12) 5_556 2_565 ? 
Eu1 In1 Ca1 0.00(15) 2_565 2_565 ? 
Ge2 In1 Eu1 57.51(10) . 2 ? 
Ge3 In1 Eu1 60.19(11) 5_656 2 ? 
Ge3 In1 Eu1 120.92(15) 5_666 2 ? 
Ge3 In1 Eu1 132.79(10) 1_455 2 ? 
Ca2 In1 Eu1 119.85(12) 5_566 2 ? 
Eu2 In1 Eu1 119.85(12) 5_566 2 ? 
Ca2 In1 Eu1 69.96(12) 5_556 2 ? 
Eu2 In1 Eu1 69.96(12) 5_556 2 ? 
Eu1 In1 Eu1 78.70(13) 2_565 2 ? 
Ca1 In1 Eu1 78.70(13) 2_565 2 ? 
Ge2 In1 Ca1 57.51(10) . 2 ? 
Ge3 In1 Ca1 60.19(11) 5_656 2 ? 
Ge3 In1 Ca1 120.92(15) 5_666 2 ? 
Ge3 In1 Ca1 132.79(10) 1_455 2 ? 
Ca2 In1 Ca1 119.85(12) 5_566 2 ? 
Eu2 In1 Ca1 119.85(12) 5_566 2 ? 
Ca2 In1 Ca1 69.96(12) 5_556 2 ? 
Eu2 In1 Ca1 69.96(12) 5_556 2 ? 
Eu1 In1 Ca1 78.70(13) 2_565 2 ? 
Ca1 In1 Ca1 78.70(13) 2_565 2 ? 
Eu1 In1 Ca1 0.00(15) 2 2 ? 
Ge1 In2 Ge1 91.60(12) . 6_657 ? 
Ge1 In2 Ge2 89.21(16) . 6_557 ? 
Ge1 In2 Ge2 179.19(15) 6_657 6_557 ? 
Ge1 In2 Ca2 124.94(11) . 2_565 ? 
Ge1 In2 Ca2 58.29(10) 6_657 2_565 ? 
Ge2 In2 Ca2 121.18(11) 6_557 2_565 ? 
Ge1 In2 Eu2 124.94(11) . 2_565 ? 
Ge1 In2 Eu2 58.29(10) 6_657 2_565 ? 
Ge2 In2 Eu2 121.18(11) 6_557 2_565 ? 
Ca2 In2 Eu2 0.00(11) 2_565 2_565 ? 
Ge1 In2 Ca2 124.94(10) . 2 ? 
Ge1 In2 Ca2 58.29(10) 6_657 2 ? 
Ge2 In2 Ca2 121.18(11) 6_557 2 ? 
Ca2 In2 Ca2 79.88(12) 2_565 2 ? 
Eu2 In2 Ca2 79.88(12) 2_565 2 ? 
Ge1 In2 Eu2 124.94(10) . 2 ? 
Ge1 In2 Eu2 58.29(10) 6_657 2 ? 
Ge2 In2 Eu2 121.18(11) 6_557 2 ? 
Ca2 In2 Eu2 79.88(12) 2_565 2 ? 
Eu2 In2 Eu2 79.88(12) 2_565 2 ? 
Ca2 In2 Eu2 0.00(11) 2 2 ? 
Ge1 In2 Ca3 58.56(12) . 2 ? 
Ge1 In2 Ca3 56.74(12) 6_657 2 ? 
Ge2 In2 Ca3 123.78(13) 6_557 2 ? 
Ca2 In2 Ca3 115.02(15) 2_565 2 ? 
Eu2 In2 Ca3 115.02(15) 2_565 2 ? 
Ca2 In2 Ca3 66.43(12) 2 2 ? 
Eu2 In2 Ca3 66.43(12) 2 2 ? 
Ge1 In2 Eu3 58.56(12) . 2 ? 
Ge1 In2 Eu3 56.74(12) 6_657 2 ? 
Ge2 In2 Eu3 123.78(13) 6_557 2 ? 
Ca2 In2 Eu3 115.02(15) 2_565 2 ? 
Eu2 In2 Eu3 115.02(15) 2_565 2 ? 
Ca2 In2 Eu3 66.43(12) 2 2 ? 
Eu2 In2 Eu3 66.43(12) 2 2 ? 
Ca3 In2 Eu3 0.00(13) 2 2 ? 
Ge1 In2 Ca3 58.56(12) . 2_565 ? 
Ge1 In2 Ca3 56.74(12) 6_657 2_565 ? 
Ge2 In2 Ca3 123.78(13) 6_557 2_565 ? 
Ca2 In2 Ca3 66.43(12) 2_565 2_565 ? 
Eu2 In2 Ca3 66.43(12) 2_565 2_565 ? 
Ca2 In2 Ca3 115.02(15) 2 2_565 ? 
Eu2 In2 Ca3 115.02(15) 2 2_565 ? 
Ca3 In2 Ca3 79.71(14) 2 2_565 ? 
Eu3 In2 Ca3 79.71(14) 2 2_565 ? 
Ge1 In2 Eu3 58.56(12) . 2_565 ? 
Ge1 In2 Eu3 56.74(12) 6_657 2_565 ? 
Ge2 In2 Eu3 123.78(13) 6_557 2_565 ? 
Ca2 In2 Eu3 66.43(12) 2_565 2_565 ? 
Eu2 In2 Eu3 66.43(12) 2_565 2_565 ? 
Ca2 In2 Eu3 115.02(15) 2 2_565 ? 
Eu2 In2 Eu3 115.02(15) 2 2_565 ? 
Ca3 In2 Eu3 79.71(14) 2 2_565 ? 
Eu3 In2 Eu3 79.71(14) 2 2_565 ? 
Ca3 In2 Eu3 0.00(13) 2_565 2_565 ? 
Ge1 In2 Eu3 56.29(12) . 5_556 ? 
Ge1 In2 Eu3 123.63(13) 6_657 5_556 ? 
Ge2 In2 Eu3 56.89(12) 6_557 5_556 ? 
Ca2 In2 Eu3 178.01(15) 2_565 5_556 ? 
Eu2 In2 Eu3 178.01(15) 2_565 5_556 ? 
Ca2 In2 Eu3 100.68(9) 2 5_556 ? 
Eu2 In2 Eu3 100.68(9) 2 5_556 ? 
Ca3 In2 Eu3 66.89(7) 2 5_556 ? 
Eu3 In2 Eu3 66.89(7) 2 5_556 ? 
Ca3 In2 Eu3 114.85(10) 2_565 5_556 ? 
Eu3 In2 Eu3 114.85(10) 2_565 5_556 ? 
Ge2 Ge1 In2 115.2(2) . . ? 
Ge2 Ge1 In2 119.09(17) . 6_557 ? 
In2 Ge1 In2 125.68(17) . 6_557 ? 
Ge2 Ge1 Ca3 133.47(10) . 5_566 ? 
In2 Ge1 Ca3 72.18(13) . 5_566 ? 
In2 Ge1 Ca3 71.21(15) 6_557 5_566 ? 
Ge2 Ge1 Ca3 133.47(10) . 5_556 ? 
In2 Ge1 Ca3 72.18(13) . 5_556 ? 
In2 Ge1 Ca3 71.21(15) 6_557 5_556 ? 
Ca3 Ge1 Ca3 93.0(2) 5_566 5_556 ? 
Ge2 Ge1 Eu3 133.47(10) . 5_566 ? 
In2 Ge1 Eu3 72.18(13) . 5_566 ? 
In2 Ge1 Eu3 71.21(15) 6_557 5_566 ? 
Ca3 Ge1 Eu3 0.0(3) 5_566 5_566 ? 
Ca3 Ge1 Eu3 93.0(2) 5_556 5_566 ? 
Ge2 Ge1 Eu3 133.47(10) . 5_556 ? 
In2 Ge1 Eu3 72.18(13) . 5_556 ? 
In2 Ge1 Eu3 71.21(15) 6_557 5_556 ? 
Ca3 Ge1 Eu3 93.0(2) 5_566 5_556 ? 
Ca3 Ge1 Eu3 0.0(2) 5_556 5_556 ? 
Eu3 Ge1 Eu3 93.0(2) 5_566 5_556 ? 
Ge2 Ge1 Eu2 68.09(12) . 5_556 ? 
In2 Ge1 Eu2 134.43(8) . 5_556 ? 
In2 Ge1 Eu2 70.05(12) 6_557 5_556 ? 
Ca3 Ge1 Eu2 141.2(2) 5_566 5_556 ? 
Ca3 Ge1 Eu2 75.55(12) 5_556 5_556 ? 
Eu3 Ge1 Eu2 141.2(2) 5_566 5_556 ? 
Eu3 Ge1 Eu2 75.55(12) 5_556 5_556 ? 
Ge2 Ge1 Ca2 68.09(12) . 5_556 ? 
In2 Ge1 Ca2 134.43(8) . 5_556 ? 
In2 Ge1 Ca2 70.05(12) 6_557 5_556 ? 
Ca3 Ge1 Ca2 141.2(2) 5_566 5_556 ? 
Ca3 Ge1 Ca2 75.55(12) 5_556 5_556 ? 
Eu3 Ge1 Ca2 141.2(2) 5_566 5_556 ? 
Eu3 Ge1 Ca2 75.55(12) 5_556 5_556 ? 
Eu2 Ge1 Ca2 0.00(16) 5_556 5_556 ? 
Ge2 Ge1 Ca2 68.09(12) . 5_566 ? 
In2 Ge1 Ca2 134.43(8) . 5_566 ? 
In2 Ge1 Ca2 70.05(12) 6_557 5_566 ? 
Ca3 Ge1 Ca2 75.55(12) 5_566 5_566 ? 
Ca3 Ge1 Ca2 141.2(2) 5_556 5_566 ? 
Eu3 Ge1 Ca2 75.55(12) 5_566 5_566 ? 
Eu3 Ge1 Ca2 141.2(2) 5_556 5_566 ? 
Eu2 Ge1 Ca2 90.36(14) 5_556 5_566 ? 
Ca2 Ge1 Ca2 90.36(14) 5_556 5_566 ? 
Ge2 Ge1 Eu2 68.09(12) . 5_566 ? 
In2 Ge1 Eu2 134.43(8) . 5_566 ? 
In2 Ge1 Eu2 70.05(12) 6_557 5_566 ? 
Ca3 Ge1 Eu2 75.55(12) 5_566 5_566 ? 
Ca3 Ge1 Eu2 141.2(2) 5_556 5_566 ? 
Eu3 Ge1 Eu2 75.55(12) 5_566 5_566 ? 
Eu3 Ge1 Eu2 141.2(2) 5_556 5_566 ? 
Eu2 Ge1 Eu2 90.36(14) 5_556 5_566 ? 
Ca2 Ge1 Eu2 90.36(14) 5_556 5_566 ? 
Ca2 Ge1 Eu2 0.00(19) 5_566 5_566 ? 
Ge2 Ge1 Eu3 65.42(14) . 2_565 ? 
In2 Ge1 Eu3 70.05(14) . 2_565 ? 
In2 Ge1 Eu3 134.67(11) 6_557 2_565 ? 
Ca3 Ge1 Eu3 76.45(7) 5_566 2_565 ? 
Ca3 Ge1 Eu3 142.22(15) 5_556 2_565 ? 
Eu3 Ge1 Eu3 76.45(7) 5_566 2_565 ? 
Eu3 Ge1 Eu3 142.22(15) 5_556 2_565 ? 
Eu2 Ge1 Eu3 133.50(18) 5_556 2_565 ? 
Ca2 Ge1 Eu3 133.50(18) 5_556 2_565 ? 
Ca2 Ge1 Eu3 71.74(12) 5_566 2_565 ? 
Eu2 Ge1 Eu3 71.74(12) 5_566 2_565 ? 
Ge1 Ge2 In1 112.8(2) . . ? 
Ge1 Ge2 In2 118.28(17) . 6_657 ? 
In1 Ge2 In2 128.88(17) . 6_657 ? 
Ge1 Ge2 Eu1 133.88(9) . 2 ? 
In1 Ge2 Eu1 73.46(12) . 2 ? 
In2 Ge2 Eu1 71.74(14) 6_657 2 ? 
Ge1 Ge2 Eu1 133.88(9) . 2_565 ? 
In1 Ge2 Eu1 73.46(12) . 2_565 ? 
In2 Ge2 Eu1 71.74(14) 6_657 2_565 ? 
Eu1 Ge2 Eu1 92.21(18) 2 2_565 ? 
Ge1 Ge2 Ca1 133.88(9) . 2 ? 
In1 Ge2 Ca1 73.46(12) . 2 ? 
In2 Ge2 Ca1 71.74(14) 6_657 2 ? 
Eu1 Ge2 Ca1 0.00(15) 2 2 ? 
Eu1 Ge2 Ca1 92.21(18) 2_565 2 ? 
Ge1 Ge2 Ca1 133.88(9) . 2_565 ? 
In1 Ge2 Ca1 73.46(12) . 2_565 ? 
In2 Ge2 Ca1 71.74(14) 6_657 2_565 ? 
Eu1 Ge2 Ca1 92.21(18) 2 2_565 ? 
Eu1 Ge2 Ca1 0.00(15) 2_565 2_565 ? 
Ca1 Ge2 Ca1 92.21(18) 2 2_565 ? 
Ge1 Ge2 Ca3 67.11(15) . 2_565 ? 
In1 Ge2 Ca3 133.32(10) . 2_565 ? 
In2 Ge2 Ca3 70.92(14) 6_657 2_565 ? 
Eu1 Ge2 Ca3 142.7(2) 2 2_565 ? 
Eu1 Ge2 Ca3 76.36(13) 2_565 2_565 ? 
Ca1 Ge2 Ca3 142.7(2) 2 2_565 ? 
Ca1 Ge2 Ca3 76.36(13) 2_565 2_565 ? 
Ge1 Ge2 Eu3 67.11(15) . 2_565 ? 
In1 Ge2 Eu3 133.32(10) . 2_565 ? 
In2 Ge2 Eu3 70.92(14) 6_657 2_565 ? 
Eu1 Ge2 Eu3 142.7(2) 2 2_565 ? 
Eu1 Ge2 Eu3 76.36(13) 2_565 2_565 ? 
Ca1 Ge2 Eu3 142.7(2) 2 2_565 ? 
Ca1 Ge2 Eu3 76.36(13) 2_565 2_565 ? 
Ca3 Ge2 Eu3 0.00(14) 2_565 2_565 ? 
Ge1 Ge2 Ca3 67.11(15) . 2 ? 
In1 Ge2 Ca3 133.32(10) . 2 ? 
In2 Ge2 Ca3 70.92(14) 6_657 2 ? 
Eu1 Ge2 Ca3 76.36(13) 2 2 ? 
Eu1 Ge2 Ca3 142.7(2) 2_565 2 ? 
Ca1 Ge2 Ca3 76.36(13) 2 2 ? 
Ca1 Ge2 Ca3 142.7(2) 2_565 2 ? 
Ca3 Ge2 Ca3 91.33(18) 2_565 2 ? 
Eu3 Ge2 Ca3 91.33(18) 2_565 2 ? 
Ge1 Ge2 Eu3 67.11(15) . 2 ? 
In1 Ge2 Eu3 133.32(10) . 2 ? 
In2 Ge2 Eu3 70.92(14) 6_657 2 ? 
Eu1 Ge2 Eu3 76.36(13) 2 2 ? 
Eu1 Ge2 Eu3 142.7(2) 2_565 2 ? 
Ca1 Ge2 Eu3 76.36(13) 2 2 ? 
Ca1 Ge2 Eu3 142.7(2) 2_565 2 ? 
Ca3 Ge2 Eu3 91.33(18) 2_565 2 ? 
Eu3 Ge2 Eu3 91.33(18) 2_565 2 ? 
Ca3 Ge2 Eu3 0.000(1) 2 2 ? 
Ge1 Ge2 Eu2 65.11(13) . 5_556 ? 
In1 Ge2 Eu2 67.94(11) . 5_556 ? 
In2 Ge2 Eu2 135.59(8) 6_657 5_556 ? 
Eu1 Ge2 Eu2 77.41(12) 2 5_556 ? 
Eu1 Ge2 Eu2 141.40(16) 2_565 5_556 ? 
Ca1 Ge2 Eu2 77.41(12) 2 5_556 ? 
Ca1 Ge2 Eu2 141.40(16) 2_565 5_556 ? 
Ca3 Ge2 Eu2 132.20(19) 2_565 5_556 ? 
Eu3 Ge2 Eu2 132.20(19) 2_565 5_556 ? 
Ca3 Ge2 Eu2 71.32(12) 2 5_556 ? 
Eu3 Ge2 Eu2 71.32(12) 2 5_556 ? 
In1 Ge3 In1 105.72(16) 5_656 5_666 ? 
In1 Ge3 In1 73.80(11) 5_656 1_655 ? 
In1 Ge3 In1 73.80(11) 5_666 1_655 ? 
In1 Ge3 Eu1 73.64(10) 5_656 2 ? 
In1 Ge3 Eu1 149.01(19) 5_666 2 ? 
In1 Ge3 Eu1 132.43(11) 1_655 2 ? 
In1 Ge3 Ca1 73.64(10) 5_656 2 ? 
In1 Ge3 Ca1 149.01(19) 5_666 2 ? 
In1 Ge3 Ca1 132.43(11) 1_655 2 ? 
Eu1 Ge3 Ca1 0.00(16) 2 2 ? 
In1 Ge3 Eu1 149.01(19) 5_656 2_565 ? 
In1 Ge3 Eu1 73.64(10) 5_666 2_565 ? 
In1 Ge3 Eu1 132.43(11) 1_655 2_565 ? 
Eu1 Ge3 Eu1 91.2(2) 2 2_565 ? 
Ca1 Ge3 Eu1 91.2(2) 2 2_565 ? 
In1 Ge3 Ca1 149.01(19) 5_656 2_565 ? 
In1 Ge3 Ca1 73.64(10) 5_666 2_565 ? 
In1 Ge3 Ca1 132.43(11) 1_655 2_565 ? 
Eu1 Ge3 Ca1 91.2(2) 2 2_565 ? 
Ca1 Ge3 Ca1 91.2(2) 2 2_565 ? 
Eu1 Ge3 Ca1 0.0(2) 2_565 2_565 ? 
In1 Ge3 Ca1 71.03(11) 5_656 6_656 ? 
In1 Ge3 Ca1 71.03(11) 5_666 6_656 ? 
In1 Ge3 Ca1 119.91(16) 1_655 6_656 ? 
Eu1 Ge3 Ca1 79.92(14) 2 6_656 ? 
Ca1 Ge3 Ca1 79.92(14) 2 6_656 ? 
Eu1 Ge3 Ca1 79.92(14) 2_565 6_656 ? 
Ca1 Ge3 Ca1 79.92(14) 2_565 6_656 ? 
In1 Ge3 Eu1 71.03(11) 5_656 6_656 ? 
In1 Ge3 Eu1 71.03(11) 5_666 6_656 ? 
In1 Ge3 Eu1 119.91(16) 1_655 6_656 ? 
Eu1 Ge3 Eu1 79.92(14) 2 6_656 ? 
Ca1 Ge3 Eu1 79.92(14) 2 6_656 ? 
Eu1 Ge3 Eu1 79.92(14) 2_565 6_656 ? 
Ca1 Ge3 Eu1 79.92(14) 2_565 6_656 ? 
Ca1 Ge3 Eu1 0.00(16) 6_656 6_656 ? 
In1 Ge3 Eu2 138.52(18) 5_656 5_666 ? 
In1 Ge3 Eu2 71.13(9) 5_666 5_666 ? 
In1 Ge3 Eu2 65.55(11) 1_655 5_666 ? 
Eu1 Ge3 Eu2 130.21(16) 2 5_666 ? 
Ca1 Ge3 Eu2 130.21(16) 2 5_666 ? 
Eu1 Ge3 Eu2 71.61(13) 2_565 5_666 ? 
Ca1 Ge3 Eu2 71.61(13) 2_565 5_666 ? 
Ca1 Ge3 Eu2 137.56(7) 6_656 5_666 ? 
Eu1 Ge3 Eu2 137.56(7) 6_656 5_666 ? 
In1 Ge3 Ca2 138.52(18) 5_656 5_666 ? 
In1 Ge3 Ca2 71.13(9) 5_666 5_666 ? 
In1 Ge3 Ca2 65.55(11) 1_655 5_666 ? 
Eu1 Ge3 Ca2 130.21(16) 2 5_666 ? 
Ca1 Ge3 Ca2 130.21(16) 2 5_666 ? 
Eu1 Ge3 Ca2 71.61(13) 2_565 5_666 ? 
Ca1 Ge3 Ca2 71.61(13) 2_565 5_666 ? 
Ca1 Ge3 Ca2 137.56(7) 6_656 5_666 ? 
Eu1 Ge3 Ca2 137.56(7) 6_656 5_666 ? 
Eu2 Ge3 Ca2 0.00(11) 5_666 5_666 ? 
In1 Ge3 Ca2 71.13(9) 5_656 5_656 ? 
In1 Ge3 Ca2 138.52(18) 5_666 5_656 ? 
In1 Ge3 Ca2 65.55(11) 1_655 5_656 ? 
Eu1 Ge3 Ca2 71.61(13) 2 5_656 ? 
Ca1 Ge3 Ca2 71.61(13) 2 5_656 ? 
Eu1 Ge3 Ca2 130.21(16) 2_565 5_656 ? 
Ca1 Ge3 Ca2 130.21(16) 2_565 5_656 ? 
Ca1 Ge3 Ca2 137.56(7) 6_656 5_656 ? 
Eu1 Ge3 Ca2 137.56(7) 6_656 5_656 ? 
Eu2 Ge3 Ca2 84.56(14) 5_666 5_656 ? 
Ca2 Ge3 Ca2 84.56(14) 5_666 5_656 ? 
 
_diffrn_measured_fraction_theta_max    0.939 
_diffrn_reflns_theta_full              25.00 
_diffrn_measured_fraction_theta_full   1.000 
_refine_diff_density_max    3.566 
_refine_diff_density_min   -3.085 
_refine_diff_density_rms    0.714 

###

 
data_Eu0.52Ca2.48In2Ge3 
 
_audit_creation_method            SHELXL-97 
_chemical_name_systematic 
; 
 ? 
; 
_chemical_name_common             ? 
_chemical_melting_point           ? 
_chemical_formula_moiety          'Ca2.48 Eu0.52 Ge3 In2' 
_chemical_formula_sum 
 'Ca2.48 Eu0.52 Ge3 In2' 
_chemical_formula_weight          625.88 
 
loop_ 
 _atom_type_symbol 
 _atom_type_description 
 _atom_type_scat_dispersion_real 
 _atom_type_scat_dispersion_imag 
 _atom_type_scat_source 
 'Ca'  'Ca'   0.2262   0.3064 
 'International Tables Vol C Tables 4.2.6.8 and 6.1.1.4' 
 'Ge'  'Ge'   0.1547   1.8001 
 'International Tables Vol C Tables 4.2.6.8 and 6.1.1.4' 
 'In'  'In'  -0.7276   1.3100 
 'International Tables Vol C Tables 4.2.6.8 and 6.1.1.4' 
 'Eu'  'Eu'  -0.1578   3.6682 
 'International Tables Vol C Tables 4.2.6.8 and 6.1.1.4' 
 
_symmetry_cell_setting            Orthorhombic 
_symmetry_space_group_name_H-M    Pnma 
 
loop_ 
 _symmetry_equiv_pos_as_xyz 
 'x, y, z' 
 '-x+1/2, -y, z+1/2' 
 '-x, y+1/2, -z' 
 'x+1/2, -y+1/2, -z+1/2' 
 '-x, -y, -z' 
 'x-1/2, y, -z-1/2' 
 'x, -y-1/2, z' 
 '-x-1/2, y-1/2, z-1/2' 
 
_cell_length_a                    7.3903(18) 
_cell_length_b                    4.4585(12) 
_cell_length_c                    23.699(6) 
_cell_angle_alpha                 90.00 
_cell_angle_beta                  90.00 
_cell_angle_gamma                 90.00 
_cell_volume                      780.9(3) 
_cell_formula_units_Z             4 
_cell_measurement_temperature     200(2) 
_cell_measurement_reflns_used     1105 
_cell_measurement_theta_min       4.65 
_cell_measurement_theta_max       23.13 
 
_exptl_crystal_description        'needle' 
_exptl_crystal_colour             'silver' 
_exptl_crystal_size_max           0.048 
_exptl_crystal_size_mid           0.035 
_exptl_crystal_size_min           0.030 
_exptl_crystal_density_meas       ? 
_exptl_crystal_density_diffrn     5.321 
_exptl_crystal_density_method     'not measured' 
_exptl_crystal_F_000              1105 
_exptl_absorpt_coefficient_mu     22.831 
_exptl_absorpt_correction_type    'empirical' 
_exptl_absorpt_correction_T_min   0.0235 
_exptl_absorpt_correction_T_max   0.0453 
_exptl_absorpt_process_details    'SADABS' 
 
_exptl_special_details 
; 
 ? 
; 
 
_diffrn_ambient_temperature       200(2) 
_diffrn_radiation_wavelength      0.71073 
_diffrn_radiation_type            MoK\a 
_diffrn_radiation_source          'fine-focus sealed tube' 
_diffrn_radiation_monochromator   graphite 
_diffrn_measurement_device_type   'CCD area detector' 
_diffrn_measurement_method        'phi and omega scans'  
_diffrn_detector_area_resol_mean  ? 
_diffrn_standards_number          ? 
_diffrn_standards_interval_count  ? 
_diffrn_standards_interval_time   ? 
_diffrn_standards_decay_%         ? 
_diffrn_reflns_number             11130 
_diffrn_reflns_av_R_equivalents   0.1081 
_diffrn_reflns_av_sigmaI/netI     0.0844 
_diffrn_reflns_limit_h_min        -10 
_diffrn_reflns_limit_h_max        10 
_diffrn_reflns_limit_k_min        -6 
_diffrn_reflns_limit_k_max        6 
_diffrn_reflns_limit_l_min        -32 
_diffrn_reflns_limit_l_max        32 
_diffrn_reflns_theta_min          1.72 
_diffrn_reflns_theta_max          30.67 
_reflns_number_total              1305 
_reflns_number_gt                 932 
_reflns_threshold_expression      >2sigma(I) 
 
_computing_data_collection        'Bruker SMART' 
_computing_cell_refinement        'Bruker SMART' 
_computing_data_reduction         'Bruker SAINT' 
_computing_structure_solution     'SHELXS-97 (Sheldrick, 1990)' 
_computing_structure_refinement   'SHELXL-97 (Sheldrick, 1997)' 
_computing_molecular_graphics     'Bruker SHELXTL' 
_computing_publication_material   'Bruker SHEMXTL' 
 
_refine_special_details 
; 
 Refinement of F^2^ against ALL reflections.  The weighted R-factor wR and 
 goodness of fit S are based on F^2^, conventional R-factors R are based 
 on F, with F set to zero for negative F^2^. The threshold expression of 
 F^2^ > 2sigma(F^2^) is used only for calculating R-factors(gt) etc. and is 
 not relevant to the choice of reflections for refinement.  R-factors based 
 on F^2^ are statistically about twice as large as those based on F, and R- 
 factors based on ALL data will be even larger. 
; 
 
_refine_ls_structure_factor_coef  Fsqd  
_refine_ls_matrix_type            full 
_refine_ls_weighting_scheme       calc  
_refine_ls_weighting_details 
 'calc w=1/[\s^2^(Fo^2^)+(0.0000P)^2^+0.0000P] where P=(Fo^2^+2Fc^2^)/3' 
_atom_sites_solution_primary      direct 
_atom_sites_solution_secondary    difmap 
_atom_sites_solution_hydrogens    . 
_refine_ls_hydrogen_treatment     . 
_refine_ls_extinction_method      SHELXL 
_refine_ls_extinction_coef        0.00044(12) 
_refine_ls_extinction_expression 
 'Fc^*^=kFc[1+0.001xFc^2^\l^3^/sin(2\q)]^-1/4^' 
_refine_ls_number_reflns          1305 
_refine_ls_number_parameters      53 
_refine_ls_number_restraints      0 
_refine_ls_R_factor_all           0.0696 
_refine_ls_R_factor_gt            0.0369 
_refine_ls_wR_factor_ref          0.0754 
_refine_ls_wR_factor_gt           0.0675 
_refine_ls_goodness_of_fit_ref    0.963 
_refine_ls_restrained_S_all       0.963 
_refine_ls_shift/su_max           0.001 
_refine_ls_shift/su_mean          0.000 
 
loop_ 
 _atom_site_label 
 _atom_site_type_symbol 
 _atom_site_fract_x 
 _atom_site_fract_y 
 _atom_site_fract_z 
 _atom_site_U_iso_or_equiv 
 _atom_site_adp_type 
 _atom_site_occupancy 
 _atom_site_symmetry_multiplicity 
 _atom_site_calc_flag 
 _atom_site_refinement_flags 
 _atom_site_disorder_assembly 
 _atom_site_disorder_group 
Eu1 Eu 0.01168(17) 0.2500 0.07226(5) 0.0120(4) Uani 0.155(3) 2 d SP . . 
Ca1 Ca 0.01168(17) 0.2500 0.07226(5) 0.0120(4) Uani 0.845(3) 2 d SP . . 
Eu2 Eu 0.02492(14) 0.2500 0.38144(4) 0.0102(4) Uani 0.265(3) 2 d SP . . 
Ca2 Ca 0.02492(14) 0.2500 0.38144(4) 0.0102(4) Uani 0.735(3) 2 d SP . . 
Eu3 Eu 0.16491(19) 0.2500 0.22664(6) 0.0102(5) Uani 0.097(3) 2 d SP . . 
Ca3 Ca 0.16491(19) 0.2500 0.22664(6) 0.0102(5) Uani 0.903(3) 2 d SP . . 
In1 In 0.15028(8) 0.2500 0.52719(3) 0.01028(17) Uani 1 2 d S . . 
In2 In 0.16273(9) 0.2500 0.82558(3) 0.01628(19) Uani 1 2 d S . . 
Ge1 Ge 0.03770(13) 0.2500 0.71017(4) 0.0100(2) Uani 1 2 d S . . 
Ge2 Ge 0.28469(13) 0.2500 0.63623(4) 0.0097(2) Uani 1 2 d S . . 
Ge3 Ge 0.76423(14) 0.2500 0.53878(4) 0.0110(2) Uani 1 2 d S . . 
 
loop_ 
 _atom_site_aniso_label 
 _atom_site_aniso_U_11 
 _atom_site_aniso_U_22 
 _atom_site_aniso_U_33 
 _atom_site_aniso_U_23 
 _atom_site_aniso_U_13 
 _atom_site_aniso_U_12 
Eu1 0.0101(7) 0.0138(8) 0.0120(7) 0.000 0.0003(5) 0.000 
Ca1 0.0101(7) 0.0138(8) 0.0120(7) 0.000 0.0003(5) 0.000 
Eu2 0.0094(6) 0.0103(6) 0.0110(6) 0.000 0.0001(4) 0.000 
Ca2 0.0094(6) 0.0103(6) 0.0110(6) 0.000 0.0001(4) 0.000 
Eu3 0.0104(8) 0.0090(8) 0.0110(8) 0.000 0.0021(6) 0.000 
Ca3 0.0104(8) 0.0090(8) 0.0110(8) 0.000 0.0021(6) 0.000 
In1 0.0100(3) 0.0113(3) 0.0095(3) 0.000 0.0001(2) 0.000 
In2 0.0113(4) 0.0238(4) 0.0138(4) 0.000 -0.0002(3) 0.000 
Ge1 0.0094(5) 0.0105(5) 0.0100(5) 0.000 0.0005(4) 0.000 
Ge2 0.0091(5) 0.0112(5) 0.0089(5) 0.000 0.0005(4) 0.000 
Ge3 0.0093(5) 0.0113(5) 0.0124(5) 0.000 -0.0008(4) 0.000 
 
_geom_special_details 
; 
 All esds (except the esd in the dihedral angle between two l.s. planes) 
 are estimated using the full covariance matrix.  The cell esds are taken 
 into account individually in the estimation of esds in distances, angles 
 and torsion angles; correlations between esds in cell parameters are only 
 used when they are defined by crystal symmetry.  An approximate (isotropic) 
 treatment of cell esds is used for estimating esds involving l.s. planes. 
; 
 
loop_ 
 _geom_bond_atom_site_label_1 
 _geom_bond_atom_site_label_2 
 _geom_bond_distance 
 _geom_bond_site_symmetry_2 
 _geom_bond_publ_flag 
Eu1 Ge2 3.0874(12) 2_564 ? 
Eu1 Ge2 3.0874(12) 2_554 ? 
Eu1 Ge3 3.1236(13) 2_554 ? 
Eu1 Ge3 3.1236(13) 2_564 ? 
Eu1 Ge3 3.2264(17) 6_556 ? 
Eu1 In1 3.5145(12) 2_564 ? 
Eu1 In1 3.5145(12) 2_554 ? 
Eu1 In2 3.5344(13) 5_566 ? 
Eu1 In2 3.5344(13) 5_556 ? 
Eu1 In1 3.5623(16) 6_556 ? 
Eu1 Ca2 3.7609(18) 6_556 ? 
Eu1 Eu2 3.7609(18) 6_556 ? 
Eu2 Ge1 3.1462(11) 5_556 ? 
Eu2 Ge1 3.1462(11) 5_566 ? 
Eu2 Ge2 3.2219(12) 5_556 ? 
Eu2 Ge2 3.2219(12) 5_566 ? 
Eu2 Ge3 3.3124(12) 5_666 ? 
Eu2 Ge3 3.3124(12) 5_656 ? 
Eu2 In1 3.3666(10) 5_566 ? 
Eu2 In1 3.3666(10) 5_556 ? 
Eu2 In2 3.4714(11) 2_564 ? 
Eu2 In2 3.4714(11) 2_554 ? 
Eu2 In1 3.5763(14) . ? 
Eu2 Ca3 3.6933(19) 6_556 ? 
Eu3 Ge1 3.0748(13) 5_566 ? 
Eu3 Ge1 3.0748(13) 5_556 ? 
Eu3 Ge2 3.1144(13) 2_554 ? 
Eu3 Ge2 3.1144(13) 2_564 ? 
Eu3 Ge1 3.1547(13) 2_564 ? 
Eu3 Ge1 3.1547(13) 2_554 ? 
Eu3 In2 3.4772(13) 2_564 ? 
Eu3 In2 3.4772(13) 2_554 ? 
Eu3 In2 3.5162(13) 5_556 ? 
Eu3 In2 3.5162(13) 5_566 ? 
Eu3 Eu2 3.6933(19) 6_656 ? 
Eu3 Ca2 3.6933(19) 6_656 ? 
In1 Ge2 2.7684(13) . ? 
In1 Ge3 2.7953(9) 5_656 ? 
In1 Ge3 2.7953(9) 5_666 ? 
In1 Ge3 2.8662(14) 1_455 ? 
In1 Ca2 3.3666(10) 5_566 ? 
In1 Eu2 3.3666(10) 5_566 ? 
In1 Ca2 3.3666(10) 5_556 ? 
In1 Eu2 3.3666(10) 5_556 ? 
In1 Eu1 3.5145(12) 2_565 ? 
In1 Ca1 3.5145(12) 2_565 ? 
In1 Eu1 3.5145(12) 2 ? 
In1 Ca1 3.5145(12) 2 ? 
In2 Ge1 2.8869(13) . ? 
In2 Ge1 2.8978(14) 6_657 ? 
In2 Ge2 2.9368(14) 6_557 ? 
In2 Ca2 3.4714(11) 2_565 ? 
In2 Eu2 3.4714(11) 2_565 ? 
In2 Ca2 3.4714(11) 2 ? 
In2 Eu2 3.4714(11) 2 ? 
In2 Ca3 3.4772(13) 2 ? 
In2 Eu3 3.4772(13) 2 ? 
In2 Ca3 3.4772(13) 2_565 ? 
In2 Eu3 3.4772(13) 2_565 ? 
In2 Eu3 3.5162(13) 5_556 ? 
Ge1 Ge2 2.5304(15) . ? 
Ge1 In2 2.8978(14) 6_557 ? 
Ge1 Ca3 3.0748(13) 5_566 ? 
Ge1 Ca3 3.0748(13) 5_556 ? 
Ge1 Eu3 3.0748(13) 5_566 ? 
Ge1 Eu3 3.0748(13) 5_556 ? 
Ge1 Eu2 3.1462(11) 5_556 ? 
Ge1 Ca2 3.1462(11) 5_556 ? 
Ge1 Ca2 3.1462(11) 5_566 ? 
Ge1 Eu2 3.1462(11) 5_566 ? 
Ge1 Eu3 3.1547(14) 2_565 ? 
Ge2 In2 2.9368(14) 6_657 ? 
Ge2 Eu1 3.0874(12) 2 ? 
Ge2 Eu1 3.0874(12) 2_565 ? 
Ge2 Ca1 3.0874(12) 2 ? 
Ge2 Ca1 3.0874(12) 2_565 ? 
Ge2 Ca3 3.1144(13) 2_565 ? 
Ge2 Eu3 3.1144(13) 2_565 ? 
Ge2 Ca3 3.1144(13) 2 ? 
Ge2 Eu3 3.1144(13) 2 ? 
Ge2 Eu2 3.2219(12) 5_556 ? 
Ge3 In1 2.7953(9) 5_656 ? 
Ge3 In1 2.7953(9) 5_666 ? 
Ge3 In1 2.8662(14) 1_655 ? 
Ge3 Eu1 3.1236(13) 2 ? 
Ge3 Ca1 3.1236(13) 2 ? 
Ge3 Eu1 3.1236(13) 2_565 ? 
Ge3 Ca1 3.1236(13) 2_565 ? 
Ge3 Ca1 3.2264(17) 6_656 ? 
Ge3 Eu1 3.2264(17) 6_656 ? 
Ge3 Eu2 3.3124(12) 5_666 ? 
Ge3 Ca2 3.3124(12) 5_666 ? 
Ge3 Ca2 3.3124(12) 5_656 ? 
 
loop_ 
 _geom_angle_atom_site_label_1 
 _geom_angle_atom_site_label_2 
 _geom_angle_atom_site_label_3 
 _geom_angle 
 _geom_angle_site_symmetry_1 
 _geom_angle_site_symmetry_3 
 _geom_angle_publ_flag 
Ge2 Eu1 Ge2 92.45(5) 2_564 2_554 ? 
Ge2 Eu1 Ge3 163.38(5) 2_564 2_554 ? 
Ge2 Eu1 Ge3 85.85(3) 2_554 2_554 ? 
Ge2 Eu1 Ge3 85.85(3) 2_564 2_564 ? 
Ge2 Eu1 Ge3 163.38(5) 2_554 2_564 ? 
Ge3 Eu1 Ge3 91.07(5) 2_554 2_564 ? 
Ge2 Eu1 Ge3 96.81(4) 2_564 6_556 ? 
Ge2 Eu1 Ge3 96.81(4) 2_554 6_556 ? 
Ge3 Eu1 Ge3 99.81(4) 2_554 6_556 ? 
Ge3 Eu1 Ge3 99.81(4) 2_564 6_556 ? 
Ge2 Eu1 In1 49.06(3) 2_564 2_564 ? 
Ge2 Eu1 In1 105.11(4) 2_554 2_564 ? 
Ge3 Eu1 In1 147.09(5) 2_554 2_564 ? 
Ge3 Eu1 In1 86.22(3) 2_564 2_564 ? 
Ge3 Eu1 In1 48.77(2) 6_556 2_564 ? 
Ge2 Eu1 In1 105.11(4) 2_564 2_554 ? 
Ge2 Eu1 In1 49.06(3) 2_554 2_554 ? 
Ge3 Eu1 In1 86.22(3) 2_554 2_554 ? 
Ge3 Eu1 In1 147.09(5) 2_564 2_554 ? 
Ge3 Eu1 In1 48.77(2) 6_556 2_554 ? 
In1 Eu1 In1 78.74(3) 2_564 2_554 ? 
Ge2 Eu1 In2 52.12(3) 2_564 5_566 ? 
Ge2 Eu1 In2 107.27(4) 2_554 5_566 ? 
Ge3 Eu1 In2 112.71(4) 2_554 5_566 ? 
Ge3 Eu1 In2 59.06(3) 2_564 5_566 ? 
Ge3 Eu1 In2 140.327(19) 6_556 5_566 ? 
In1 Eu1 In2 93.86(2) 2_564 5_566 ? 
In1 Eu1 In2 150.17(4) 2_554 5_566 ? 
Ge2 Eu1 In2 107.27(4) 2_564 5_556 ? 
Ge2 Eu1 In2 52.12(3) 2_554 5_556 ? 
Ge3 Eu1 In2 59.06(3) 2_554 5_556 ? 
Ge3 Eu1 In2 112.71(4) 2_564 5_556 ? 
Ge3 Eu1 In2 140.327(19) 6_556 5_556 ? 
In1 Eu1 In2 150.17(4) 2_564 5_556 ? 
In1 Eu1 In2 93.86(2) 2_554 5_556 ? 
In2 Eu1 In2 78.21(4) 5_566 5_556 ? 
Ge2 Eu1 In1 133.66(2) 2_564 6_556 ? 
Ge2 Eu1 In1 133.66(2) 2_554 6_556 ? 
Ge3 Eu1 In1 48.89(2) 2_554 6_556 ? 
Ge3 Eu1 In1 48.89(2) 2_564 6_556 ? 
Ge3 Eu1 In1 83.91(4) 6_556 6_556 ? 
In1 Eu1 In1 109.38(3) 2_564 6_556 ? 
In1 Eu1 In1 109.38(3) 2_554 6_556 ? 
In2 Eu1 In1 100.36(3) 5_566 6_556 ? 
In2 Eu1 In1 100.36(3) 5_556 6_556 ? 
Ge2 Eu1 Ca2 108.84(4) 2_564 6_556 ? 
Ge2 Eu1 Ca2 108.84(4) 2_554 6_556 ? 
Ge3 Eu1 Ca2 56.61(3) 2_554 6_556 ? 
Ge3 Eu1 Ca2 56.61(3) 2_564 6_556 ? 
Ge3 Eu1 Ca2 142.30(5) 6_556 6_556 ? 
In1 Eu1 Ca2 140.226(18) 2_564 6_556 ? 
In1 Eu1 Ca2 140.226(18) 2_554 6_556 ? 
In2 Eu1 Ca2 56.73(2) 5_566 6_556 ? 
In2 Eu1 Ca2 56.73(2) 5_556 6_556 ? 
In1 Eu1 Ca2 58.39(3) 6_556 6_556 ? 
Ge2 Eu1 Eu2 108.84(4) 2_564 6_556 ? 
Ge2 Eu1 Eu2 108.84(4) 2_554 6_556 ? 
Ge3 Eu1 Eu2 56.61(3) 2_554 6_556 ? 
Ge3 Eu1 Eu2 56.61(3) 2_564 6_556 ? 
Ge3 Eu1 Eu2 142.30(5) 6_556 6_556 ? 
In1 Eu1 Eu2 140.226(18) 2_564 6_556 ? 
In1 Eu1 Eu2 140.226(18) 2_554 6_556 ? 
In2 Eu1 Eu2 56.73(2) 5_566 6_556 ? 
In2 Eu1 Eu2 56.73(2) 5_556 6_556 ? 
In1 Eu1 Eu2 58.39(3) 6_556 6_556 ? 
Ca2 Eu1 Eu2 0.00(3) 6_556 6_556 ? 
Ge1 Eu2 Ge1 90.24(4) 5_556 5_566 ? 
Ge1 Eu2 Ge2 46.81(3) 5_556 5_556 ? 
Ge1 Eu2 Ge2 107.22(4) 5_566 5_556 ? 
Ge1 Eu2 Ge2 107.22(4) 5_556 5_566 ? 
Ge1 Eu2 Ge2 46.81(3) 5_566 5_566 ? 
Ge2 Eu2 Ge2 87.56(4) 5_556 5_566 ? 
Ge1 Eu2 Ge3 160.05(4) 5_556 5_666 ? 
Ge1 Eu2 Ge3 89.21(3) 5_566 5_666 ? 
Ge2 Eu2 Ge3 150.92(4) 5_556 5_666 ? 
Ge2 Eu2 Ge3 86.71(3) 5_566 5_666 ? 
Ge1 Eu2 Ge3 89.21(3) 5_556 5_656 ? 
Ge1 Eu2 Ge3 160.05(4) 5_566 5_656 ? 
Ge2 Eu2 Ge3 86.71(3) 5_556 5_656 ? 
Ge2 Eu2 Ge3 150.92(4) 5_566 5_656 ? 
Ge3 Eu2 Ge3 84.60(4) 5_666 5_656 ? 
Ge1 Eu2 In1 148.92(4) 5_556 5_566 ? 
Ge1 Eu2 In1 85.30(3) 5_566 5_566 ? 
Ge2 Eu2 In1 105.58(4) 5_556 5_566 ? 
Ge2 Eu2 In1 49.63(2) 5_566 5_566 ? 
Ge3 Eu2 In1 50.82(3) 5_666 5_566 ? 
Ge3 Eu2 In1 105.04(4) 5_656 5_566 ? 
Ge1 Eu2 In1 85.30(3) 5_556 5_556 ? 
Ge1 Eu2 In1 148.92(4) 5_566 5_556 ? 
Ge2 Eu2 In1 49.63(2) 5_556 5_556 ? 
Ge2 Eu2 In1 105.58(4) 5_566 5_556 ? 
Ge3 Eu2 In1 105.04(4) 5_666 5_556 ? 
Ge3 Eu2 In1 50.82(3) 5_656 5_556 ? 
In1 Eu2 In1 82.93(3) 5_566 5_556 ? 
Ge1 Eu2 In2 106.83(4) 5_556 2_564 ? 
Ge1 Eu2 In2 51.65(3) 5_566 2_564 ? 
Ge2 Eu2 In2 150.11(4) 5_556 2_564 ? 
Ge2 Eu2 In2 88.76(3) 5_566 2_564 ? 
Ge3 Eu2 In2 58.18(3) 5_666 2_564 ? 
Ge3 Eu2 In2 109.70(4) 5_656 2_564 ? 
In1 Eu2 In2 94.35(2) 5_566 2_564 ? 
In1 Eu2 In2 157.86(4) 5_556 2_564 ? 
Ge1 Eu2 In2 51.65(3) 5_556 2_554 ? 
Ge1 Eu2 In2 106.83(4) 5_566 2_554 ? 
Ge2 Eu2 In2 88.76(3) 5_556 2_554 ? 
Ge2 Eu2 In2 150.11(4) 5_566 2_554 ? 
Ge3 Eu2 In2 109.70(4) 5_666 2_554 ? 
Ge3 Eu2 In2 58.18(3) 5_656 2_554 ? 
In1 Eu2 In2 157.86(4) 5_566 2_554 ? 
In1 Eu2 In2 94.35(2) 5_556 2_554 ? 
In2 Eu2 In2 79.91(3) 2_564 2_554 ? 
Ge1 Eu2 In1 134.81(2) 5_556 . ? 
Ge1 Eu2 In1 134.81(2) 5_566 . ? 
Ge2 Eu2 In1 108.03(3) 5_556 . ? 
Ge2 Eu2 In1 108.03(3) 5_566 . ? 
Ge3 Eu2 In1 47.69(2) 5_666 . ? 
Ge3 Eu2 In1 47.69(2) 5_656 . ? 
In1 Eu2 In1 58.56(2) 5_566 . ? 
In1 Eu2 In1 58.56(2) 5_556 . ? 
In2 Eu2 In1 101.31(3) 2_564 . ? 
In2 Eu2 In1 101.31(3) 2_554 . ? 
Ge1 Eu2 Ca3 54.22(3) 5_556 6_556 ? 
Ge1 Eu2 Ca3 54.22(3) 5_566 6_556 ? 
Ge2 Eu2 Ca3 53.00(3) 5_556 6_556 ? 
Ge2 Eu2 Ca3 53.00(3) 5_566 6_556 ? 
Ge3 Eu2 Ca3 137.287(19) 5_666 6_556 ? 
Ge3 Eu2 Ca3 137.287(19) 5_656 6_556 ? 
In1 Eu2 Ca3 99.73(3) 5_566 6_556 ? 
In1 Eu2 Ca3 99.73(3) 5_556 6_556 ? 
In2 Eu2 Ca3 102.39(3) 2_564 6_556 ? 
In2 Eu2 Ca3 102.39(3) 2_554 6_556 ? 
In1 Eu2 Ca3 148.93(4) . 6_556 ? 
Ge1 Eu3 Ge1 92.94(5) 5_566 5_556 ? 
Ge1 Eu3 Ge2 155.82(6) 5_566 2_554 ? 
Ge1 Eu3 Ge2 82.78(3) 5_556 2_554 ? 
Ge1 Eu3 Ge2 82.78(3) 5_566 2_564 ? 
Ge1 Eu3 Ge2 155.82(6) 5_556 2_564 ? 
Ge2 Eu3 Ge2 91.42(5) 2_554 2_564 ? 
Ge1 Eu3 Ge1 83.52(2) 5_566 2_564 ? 
Ge1 Eu3 Ge1 155.76(5) 5_556 2_564 ? 
Ge2 Eu3 Ge1 109.72(5) 2_554 2_564 ? 
Ge2 Eu3 Ge1 47.61(3) 2_564 2_564 ? 
Ge1 Eu3 Ge1 155.76(5) 5_566 2_554 ? 
Ge1 Eu3 Ge1 83.52(2) 5_556 2_554 ? 
Ge2 Eu3 Ge1 47.61(3) 2_554 2_554 ? 
Ge2 Eu3 Ge1 109.72(5) 2_564 2_554 ? 
Ge1 Eu3 Ge1 89.92(5) 2_564 2_554 ? 
Ge1 Eu3 In2 52.06(3) 5_566 2_564 ? 
Ge1 Eu3 In2 108.35(5) 5_556 2_564 ? 
Ge2 Eu3 In2 151.53(5) 2_554 2_564 ? 
Ge2 Eu3 In2 87.78(3) 2_564 2_564 ? 
Ge1 Eu3 In2 51.33(3) 2_564 2_564 ? 
Ge1 Eu3 In2 106.33(5) 2_554 2_564 ? 
Ge1 Eu3 In2 108.35(5) 5_566 2_554 ? 
Ge1 Eu3 In2 52.06(3) 5_556 2_554 ? 
Ge2 Eu3 In2 87.78(3) 2_554 2_554 ? 
Ge2 Eu3 In2 151.53(5) 2_564 2_554 ? 
Ge1 Eu3 In2 106.33(5) 2_564 2_554 ? 
Ge1 Eu3 In2 51.33(3) 2_554 2_554 ? 
In2 Eu3 In2 79.75(4) 2_564 2_554 ? 
Ge1 Eu3 In2 107.20(5) 5_566 5_556 ? 
Ge1 Eu3 In2 51.42(3) 5_556 5_556 ? 
Ge2 Eu3 In2 52.15(3) 2_554 5_556 ? 
Ge2 Eu3 In2 107.10(5) 2_564 5_556 ? 
Ge1 Eu3 In2 152.16(5) 2_564 5_556 ? 
Ge1 Eu3 In2 89.32(3) 2_554 5_556 ? 
In2 Eu3 In2 153.65(5) 2_564 5_556 ? 
In2 Eu3 In2 94.77(2) 2_554 5_556 ? 
Ge1 Eu3 In2 51.42(3) 5_566 5_566 ? 
Ge1 Eu3 In2 107.20(5) 5_556 5_566 ? 
Ge2 Eu3 In2 107.10(5) 2_554 5_566 ? 
Ge2 Eu3 In2 52.15(3) 2_564 5_566 ? 
Ge1 Eu3 In2 89.32(3) 2_564 5_566 ? 
Ge1 Eu3 In2 152.16(5) 2_554 5_566 ? 
In2 Eu3 In2 94.77(2) 2_564 5_566 ? 
In2 Eu3 In2 153.65(5) 2_554 5_566 ? 
In2 Eu3 In2 78.69(4) 5_556 5_566 ? 
Ge1 Eu3 Eu2 133.52(2) 5_566 6_656 ? 
Ge1 Eu3 Eu2 133.52(2) 5_556 6_656 ? 
Ge2 Eu3 Eu2 55.71(3) 2_554 6_656 ? 
Ge2 Eu3 Eu2 55.71(3) 2_564 6_656 ? 
Ge1 Eu3 Eu2 54.01(3) 2_564 6_656 ? 
Ge1 Eu3 Eu2 54.01(3) 2_554 6_656 ? 
In2 Eu3 Eu2 101.76(4) 2_564 6_656 ? 
In2 Eu3 Eu2 101.76(4) 2_554 6_656 ? 
In2 Eu3 Eu2 104.59(4) 5_556 6_656 ? 
In2 Eu3 Eu2 104.59(4) 5_566 6_656 ? 
Ge1 Eu3 Ca2 133.52(2) 5_566 6_656 ? 
Ge1 Eu3 Ca2 133.52(2) 5_556 6_656 ? 
Ge2 Eu3 Ca2 55.71(3) 2_554 6_656 ? 
Ge2 Eu3 Ca2 55.71(3) 2_564 6_656 ? 
Ge1 Eu3 Ca2 54.01(3) 2_564 6_656 ? 
Ge1 Eu3 Ca2 54.01(3) 2_554 6_656 ? 
In2 Eu3 Ca2 101.76(4) 2_564 6_656 ? 
In2 Eu3 Ca2 101.76(4) 2_554 6_656 ? 
In2 Eu3 Ca2 104.59(4) 5_556 6_656 ? 
In2 Eu3 Ca2 104.59(4) 5_566 6_656 ? 
Eu2 Eu3 Ca2 0.00(2) 6_656 6_656 ? 
Ge2 In1 Ge3 116.17(3) . 5_656 ? 
Ge2 In1 Ge3 116.17(3) . 5_666 ? 
Ge3 In1 Ge3 105.79(4) 5_656 5_666 ? 
Ge2 In1 Ge3 105.53(4) . 1_455 ? 
Ge3 In1 Ge3 106.18(3) 5_656 1_455 ? 
Ge3 In1 Ge3 106.18(3) 5_666 1_455 ? 
Ge2 In1 Ca2 62.46(3) . 5_566 ? 
Ge3 In1 Ca2 167.10(3) 5_656 5_566 ? 
Ge3 In1 Ca2 85.33(3) 5_666 5_566 ? 
Ge3 In1 Ca2 63.61(2) 1_455 5_566 ? 
Ge2 In1 Eu2 62.46(3) . 5_566 ? 
Ge3 In1 Eu2 167.10(3) 5_656 5_566 ? 
Ge3 In1 Eu2 85.33(3) 5_666 5_566 ? 
Ge3 In1 Eu2 63.61(2) 1_455 5_566 ? 
Ca2 In1 Eu2 0.00(4) 5_566 5_566 ? 
Ge2 In1 Ca2 62.46(3) . 5_556 ? 
Ge3 In1 Ca2 85.33(3) 5_656 5_556 ? 
Ge3 In1 Ca2 167.10(3) 5_666 5_556 ? 
Ge3 In1 Ca2 63.61(2) 1_455 5_556 ? 
Ca2 In1 Ca2 82.93(3) 5_566 5_556 ? 
Eu2 In1 Ca2 82.93(3) 5_566 5_556 ? 
Ge2 In1 Eu2 62.46(3) . 5_556 ? 
Ge3 In1 Eu2 85.33(3) 5_656 5_556 ? 
Ge3 In1 Eu2 167.10(3) 5_666 5_556 ? 
Ge3 In1 Eu2 63.61(2) 1_455 5_556 ? 
Ca2 In1 Eu2 82.93(3) 5_566 5_556 ? 
Eu2 In1 Eu2 82.93(3) 5_566 5_556 ? 
Ca2 In1 Eu2 0.00(3) 5_556 5_556 ? 
Ge2 In1 Eu1 57.40(3) . 2_565 ? 
Ge3 In1 Eu1 121.01(4) 5_656 2_565 ? 
Ge3 In1 Eu1 60.23(3) 5_666 2_565 ? 
Ge3 In1 Eu1 132.72(3) 1_455 2_565 ? 
Ca2 In1 Eu1 70.00(3) 5_566 2_565 ? 
Eu2 In1 Eu1 70.00(3) 5_566 2_565 ? 
Ca2 In1 Eu1 119.86(3) 5_556 2_565 ? 
Eu2 In1 Eu1 119.86(3) 5_556 2_565 ? 
Ge2 In1 Ca1 57.40(3) . 2_565 ? 
Ge3 In1 Ca1 121.01(4) 5_656 2_565 ? 
Ge3 In1 Ca1 60.23(3) 5_666 2_565 ? 
Ge3 In1 Ca1 132.72(3) 1_455 2_565 ? 
Ca2 In1 Ca1 70.00(3) 5_566 2_565 ? 
Eu2 In1 Ca1 70.00(3) 5_566 2_565 ? 
Ca2 In1 Ca1 119.86(3) 5_556 2_565 ? 
Eu2 In1 Ca1 119.86(3) 5_556 2_565 ? 
Eu1 In1 Ca1 0.00(4) 2_565 2_565 ? 
Ge2 In1 Eu1 57.40(3) . 2 ? 
Ge3 In1 Eu1 60.23(3) 5_656 2 ? 
Ge3 In1 Eu1 121.01(4) 5_666 2 ? 
Ge3 In1 Eu1 132.72(3) 1_455 2 ? 
Ca2 In1 Eu1 119.86(3) 5_566 2 ? 
Eu2 In1 Eu1 119.86(3) 5_566 2 ? 
Ca2 In1 Eu1 70.00(3) 5_556 2 ? 
Eu2 In1 Eu1 70.00(3) 5_556 2 ? 
Eu1 In1 Eu1 78.74(3) 2_565 2 ? 
Ca1 In1 Eu1 78.74(3) 2_565 2 ? 
Ge2 In1 Ca1 57.40(3) . 2 ? 
Ge3 In1 Ca1 60.23(3) 5_656 2 ? 
Ge3 In1 Ca1 121.01(4) 5_666 2 ? 
Ge3 In1 Ca1 132.72(3) 1_455 2 ? 
Ca2 In1 Ca1 119.86(3) 5_566 2 ? 
Eu2 In1 Ca1 119.86(3) 5_566 2 ? 
Ca2 In1 Ca1 70.00(3) 5_556 2 ? 
Eu2 In1 Ca1 70.00(3) 5_556 2 ? 
Eu1 In1 Ca1 78.74(3) 2_565 2 ? 
Ca1 In1 Ca1 78.74(3) 2_565 2 ? 
Eu1 In1 Ca1 0.00(4) 2 2 ? 
Ge1 In2 Ge1 91.66(3) . 6_657 ? 
Ge1 In2 Ge2 89.28(3) . 6_557 ? 
Ge1 In2 Ge2 179.05(4) 6_657 6_557 ? 
Ge1 In2 Ca2 125.04(3) . 2_565 ? 
Ge1 In2 Ca2 58.37(3) 6_657 2_565 ? 
Ge2 In2 Ca2 121.00(3) 6_557 2_565 ? 
Ge1 In2 Eu2 125.04(3) . 2_565 ? 
Ge1 In2 Eu2 58.37(3) 6_657 2_565 ? 
Ge2 In2 Eu2 121.00(3) 6_557 2_565 ? 
Ca2 In2 Eu2 0.00(3) 2_565 2_565 ? 
Ge1 In2 Ca2 125.04(2) . 2 ? 
Ge1 In2 Ca2 58.37(3) 6_657 2 ? 
Ge2 In2 Ca2 121.00(3) 6_557 2 ? 
Ca2 In2 Ca2 79.91(3) 2_565 2 ? 
Eu2 In2 Ca2 79.91(3) 2_565 2 ? 
Ge1 In2 Eu2 125.04(2) . 2 ? 
Ge1 In2 Eu2 58.37(3) 6_657 2 ? 
Ge2 In2 Eu2 121.00(3) 6_557 2 ? 
Ca2 In2 Eu2 79.91(3) 2_565 2 ? 
Eu2 In2 Eu2 79.91(3) 2_565 2 ? 
Ca2 In2 Eu2 0.00(3) 2 2 ? 
Ge1 In2 Ca3 58.56(3) . 2 ? 
Ge1 In2 Ca3 56.80(3) 6_657 2 ? 
Ge2 In2 Ca3 123.80(3) 6_557 2 ? 
Ca2 In2 Ca3 115.17(3) 2_565 2 ? 
Eu2 In2 Ca3 115.17(3) 2_565 2 ? 
Ca2 In2 Ca3 66.54(3) 2 2 ? 
Eu2 In2 Ca3 66.54(3) 2 2 ? 
Ge1 In2 Eu3 58.56(3) . 2 ? 
Ge1 In2 Eu3 56.80(3) 6_657 2 ? 
Ge2 In2 Eu3 123.80(3) 6_557 2 ? 
Ca2 In2 Eu3 115.17(3) 2_565 2 ? 
Eu2 In2 Eu3 115.17(3) 2_565 2 ? 
Ca2 In2 Eu3 66.54(3) 2 2 ? 
Eu2 In2 Eu3 66.54(3) 2 2 ? 
Ca3 In2 Eu3 0.00(3) 2 2 ? 
Ge1 In2 Ca3 58.56(3) . 2_565 ? 
Ge1 In2 Ca3 56.80(3) 6_657 2_565 ? 
Ge2 In2 Ca3 123.80(3) 6_557 2_565 ? 
Ca2 In2 Ca3 66.54(3) 2_565 2_565 ? 
Eu2 In2 Ca3 66.54(3) 2_565 2_565 ? 
Ca2 In2 Ca3 115.17(3) 2 2_565 ? 
Eu2 In2 Ca3 115.17(3) 2 2_565 ? 
Ca3 In2 Ca3 79.75(4) 2 2_565 ? 
Eu3 In2 Ca3 79.75(4) 2 2_565 ? 
Ge1 In2 Eu3 58.56(3) . 2_565 ? 
Ge1 In2 Eu3 56.80(3) 6_657 2_565 ? 
Ge2 In2 Eu3 123.80(3) 6_557 2_565 ? 
Ca2 In2 Eu3 66.54(3) 2_565 2_565 ? 
Eu2 In2 Eu3 66.54(3) 2_565 2_565 ? 
Ca2 In2 Eu3 115.17(3) 2 2_565 ? 
Eu2 In2 Eu3 115.17(3) 2 2_565 ? 
Ca3 In2 Eu3 79.75(4) 2 2_565 ? 
Eu3 In2 Eu3 79.75(4) 2 2_565 ? 
Ca3 In2 Eu3 0.00(3) 2_565 2_565 ? 
Ge1 In2 Eu3 56.37(3) . 5_556 ? 
Ge1 In2 Eu3 123.75(3) 6_657 5_556 ? 
Ge2 In2 Eu3 56.86(3) 6_557 5_556 ? 
Ca2 In2 Eu3 177.79(4) 2_565 5_556 ? 
Eu2 In2 Eu3 177.79(4) 2_565 5_556 ? 
Ca2 In2 Eu3 100.66(3) 2 5_556 ? 
Eu2 In2 Eu3 100.66(3) 2 5_556 ? 
Ca3 In2 Eu3 66.95(2) 2 5_556 ? 
Eu3 In2 Eu3 66.95(2) 2 5_556 ? 
Ca3 In2 Eu3 114.92(3) 2_565 5_556 ? 
Eu3 In2 Eu3 114.92(3) 2_565 5_556 ? 
Ge2 Ge1 In2 115.17(5) . . ? 
Ge2 Ge1 In2 119.16(5) . 6_557 ? 
In2 Ge1 In2 125.67(4) . 6_557 ? 
Ge2 Ge1 Ca3 133.52(2) . 5_566 ? 
In2 Ge1 Ca3 72.21(3) . 5_566 ? 
In2 Ge1 Ca3 71.14(4) 6_557 5_566 ? 
Ge2 Ge1 Ca3 133.52(2) . 5_556 ? 
In2 Ge1 Ca3 72.21(3) . 5_556 ? 
In2 Ge1 Ca3 71.14(4) 6_557 5_556 ? 
Ca3 Ge1 Ca3 92.94(5) 5_566 5_556 ? 
Ge2 Ge1 Eu3 133.52(2) . 5_566 ? 
In2 Ge1 Eu3 72.21(3) . 5_566 ? 
In2 Ge1 Eu3 71.14(4) 6_557 5_566 ? 
Ca3 Ge1 Eu3 0.00(6) 5_566 5_566 ? 
Ca3 Ge1 Eu3 92.94(5) 5_556 5_566 ? 
Ge2 Ge1 Eu3 133.52(2) . 5_556 ? 
In2 Ge1 Eu3 72.21(3) . 5_556 ? 
In2 Ge1 Eu3 71.14(4) 6_557 5_556 ? 
Ca3 Ge1 Eu3 92.94(5) 5_566 5_556 ? 
Ca3 Ge1 Eu3 0.00(5) 5_556 5_556 ? 
Eu3 Ge1 Eu3 92.94(5) 5_566 5_556 ? 
Ge2 Ge1 Eu2 68.17(3) . 5_556 ? 
In2 Ge1 Eu2 134.50(2) . 5_556 ? 
In2 Ge1 Eu2 69.97(3) 6_557 5_556 ? 
Ca3 Ge1 Eu2 141.10(5) 5_566 5_556 ? 
Ca3 Ge1 Eu2 75.57(3) 5_556 5_556 ? 
Eu3 Ge1 Eu2 141.10(5) 5_566 5_556 ? 
Eu3 Ge1 Eu2 75.57(3) 5_556 5_556 ? 
Ge2 Ge1 Ca2 68.17(3) . 5_556 ? 
In2 Ge1 Ca2 134.50(2) . 5_556 ? 
In2 Ge1 Ca2 69.97(3) 6_557 5_556 ? 
Ca3 Ge1 Ca2 141.10(5) 5_566 5_556 ? 
Ca3 Ge1 Ca2 75.57(3) 5_556 5_556 ? 
Eu3 Ge1 Ca2 141.10(5) 5_566 5_556 ? 
Eu3 Ge1 Ca2 75.57(3) 5_556 5_556 ? 
Eu2 Ge1 Ca2 0.00(4) 5_556 5_556 ? 
Ge2 Ge1 Ca2 68.17(3) . 5_566 ? 
In2 Ge1 Ca2 134.50(2) . 5_566 ? 
In2 Ge1 Ca2 69.97(3) 6_557 5_566 ? 
Ca3 Ge1 Ca2 75.57(3) 5_566 5_566 ? 
Ca3 Ge1 Ca2 141.10(5) 5_556 5_566 ? 
Eu3 Ge1 Ca2 75.57(3) 5_566 5_566 ? 
Eu3 Ge1 Ca2 141.10(5) 5_556 5_566 ? 
Eu2 Ge1 Ca2 90.24(4) 5_556 5_566 ? 
Ca2 Ge1 Ca2 90.24(4) 5_556 5_566 ? 
Ge2 Ge1 Eu2 68.17(3) . 5_566 ? 
In2 Ge1 Eu2 134.50(2) . 5_566 ? 
In2 Ge1 Eu2 69.97(3) 6_557 5_566 ? 
Ca3 Ge1 Eu2 75.57(3) 5_566 5_566 ? 
Ca3 Ge1 Eu2 141.10(5) 5_556 5_566 ? 
Eu3 Ge1 Eu2 75.57(3) 5_566 5_566 ? 
Eu3 Ge1 Eu2 141.10(5) 5_556 5_566 ? 
Eu2 Ge1 Eu2 90.24(4) 5_556 5_566 ? 
Ca2 Ge1 Eu2 90.24(4) 5_556 5_566 ? 
Ca2 Ge1 Eu2 0.00(5) 5_566 5_566 ? 
Ge2 Ge1 Eu3 65.36(4) . 2_565 ? 
In2 Ge1 Eu3 70.11(3) . 2_565 ? 
In2 Ge1 Eu3 134.62(3) 6_557 2_565 ? 
Ca3 Ge1 Eu3 76.51(2) 5_566 2_565 ? 
Ca3 Ge1 Eu3 142.31(4) 5_556 2_565 ? 
Eu3 Ge1 Eu3 76.51(2) 5_566 2_565 ? 
Eu3 Ge1 Eu3 142.31(4) 5_556 2_565 ? 
Eu2 Ge1 Eu3 133.51(4) 5_556 2_565 ? 
Ca2 Ge1 Eu3 133.51(4) 5_556 2_565 ? 
Ca2 Ge1 Eu3 71.77(3) 5_566 2_565 ? 
Eu2 Ge1 Eu3 71.77(3) 5_566 2_565 ? 
Ge1 Ge2 In1 112.81(5) . . ? 
Ge1 Ge2 In2 118.22(5) . 6_657 ? 
In1 Ge2 In2 128.98(4) . 6_657 ? 
Ge1 Ge2 Eu1 133.76(2) . 2 ? 
In1 Ge2 Eu1 73.54(3) . 2 ? 
In2 Ge2 Eu1 71.80(3) 6_657 2 ? 
Ge1 Ge2 Eu1 133.76(2) . 2_565 ? 
In1 Ge2 Eu1 73.54(3) . 2_565 ? 
In2 Ge2 Eu1 71.80(3) 6_657 2_565 ? 
Eu1 Ge2 Eu1 92.45(5) 2 2_565 ? 
Ge1 Ge2 Ca1 133.76(2) . 2 ? 
In1 Ge2 Ca1 73.54(3) . 2 ? 
In2 Ge2 Ca1 71.80(3) 6_657 2 ? 
Eu1 Ge2 Ca1 0.00(4) 2 2 ? 
Eu1 Ge2 Ca1 92.45(5) 2_565 2 ? 
Ge1 Ge2 Ca1 133.76(2) . 2_565 ? 
In1 Ge2 Ca1 73.54(3) . 2_565 ? 
In2 Ge2 Ca1 71.80(3) 6_657 2_565 ? 
Eu1 Ge2 Ca1 92.45(5) 2 2_565 ? 
Eu1 Ge2 Ca1 0.00(4) 2_565 2_565 ? 
Ca1 Ge2 Ca1 92.45(5) 2 2_565 ? 
Ge1 Ge2 Ca3 67.03(4) . 2_565 ? 
In1 Ge2 Ca3 133.24(3) . 2_565 ? 
In2 Ge2 Ca3 70.98(3) 6_657 2_565 ? 
Eu1 Ge2 Ca3 142.78(5) 2 2_565 ? 
Eu1 Ge2 Ca3 76.27(4) 2_565 2_565 ? 
Ca1 Ge2 Ca3 142.78(5) 2 2_565 ? 
Ca1 Ge2 Ca3 76.27(4) 2_565 2_565 ? 
Ge1 Ge2 Eu3 67.03(4) . 2_565 ? 
In1 Ge2 Eu3 133.24(3) . 2_565 ? 
In2 Ge2 Eu3 70.98(3) 6_657 2_565 ? 
Eu1 Ge2 Eu3 142.78(5) 2 2_565 ? 
Eu1 Ge2 Eu3 76.27(4) 2_565 2_565 ? 
Ca1 Ge2 Eu3 142.78(5) 2 2_565 ? 
Ca1 Ge2 Eu3 76.27(4) 2_565 2_565 ? 
Ca3 Ge2 Eu3 0.00(4) 2_565 2_565 ? 
Ge1 Ge2 Ca3 67.03(4) . 2 ? 
In1 Ge2 Ca3 133.24(3) . 2 ? 
In2 Ge2 Ca3 70.98(3) 6_657 2 ? 
Eu1 Ge2 Ca3 76.27(4) 2 2 ? 
Eu1 Ge2 Ca3 142.78(5) 2_565 2 ? 
Ca1 Ge2 Ca3 76.27(4) 2 2 ? 
Ca1 Ge2 Ca3 142.78(5) 2_565 2 ? 
Ca3 Ge2 Ca3 91.42(5) 2_565 2 ? 
Eu3 Ge2 Ca3 91.42(5) 2_565 2 ? 
Ge1 Ge2 Eu3 67.03(4) . 2 ? 
In1 Ge2 Eu3 133.24(3) . 2 ? 
In2 Ge2 Eu3 70.98(3) 6_657 2 ? 
Eu1 Ge2 Eu3 76.27(4) 2 2 ? 
Eu1 Ge2 Eu3 142.78(5) 2_565 2 ? 
Ca1 Ge2 Eu3 76.27(4) 2 2 ? 
Ca1 Ge2 Eu3 142.78(5) 2_565 2 ? 
Ca3 Ge2 Eu3 91.42(5) 2_565 2 ? 
Eu3 Ge2 Eu3 91.42(5) 2_565 2 ? 
Ca3 Ge2 Eu3 0.0 2 2 ? 
Ge1 Ge2 Eu2 65.02(3) . 5_556 ? 
In1 Ge2 Eu2 67.90(3) . 5_556 ? 
In2 Ge2 Eu2 135.70(2) 6_657 5_556 ? 
Eu1 Ge2 Eu2 77.45(3) 2 5_556 ? 
Eu1 Ge2 Eu2 141.44(4) 2_565 5_556 ? 
Ca1 Ge2 Eu2 77.45(3) 2 5_556 ? 
Ca1 Ge2 Eu2 141.44(4) 2_565 5_556 ? 
Ca3 Ge2 Eu2 132.04(4) 2_565 5_556 ? 
Eu3 Ge2 Eu2 132.04(4) 2_565 5_556 ? 
Ca3 Ge2 Eu2 71.28(3) 2 5_556 ? 
Eu3 Ge2 Eu2 71.28(3) 2 5_556 ? 
In1 Ge3 In1 105.78(4) 5_656 5_666 ? 
In1 Ge3 In1 73.82(3) 5_656 1_655 ? 
In1 Ge3 In1 73.82(3) 5_666 1_655 ? 
In1 Ge3 Eu1 73.77(3) 5_656 2 ? 
In1 Ge3 Eu1 149.18(4) 5_666 2 ? 
In1 Ge3 Eu1 132.39(3) 1_655 2 ? 
In1 Ge3 Ca1 73.77(3) 5_656 2 ? 
In1 Ge3 Ca1 149.18(4) 5_666 2 ? 
In1 Ge3 Ca1 132.39(3) 1_655 2 ? 
Eu1 Ge3 Ca1 0.00(4) 2 2 ? 
In1 Ge3 Eu1 149.18(4) 5_656 2_565 ? 
In1 Ge3 Eu1 73.77(3) 5_666 2_565 ? 
In1 Ge3 Eu1 132.39(3) 1_655 2_565 ? 
Eu1 Ge3 Eu1 91.07(5) 2 2_565 ? 
Ca1 Ge3 Eu1 91.07(5) 2 2_565 ? 
In1 Ge3 Ca1 149.18(4) 5_656 2_565 ? 
In1 Ge3 Ca1 73.77(3) 5_666 2_565 ? 
In1 Ge3 Ca1 132.39(3) 1_655 2_565 ? 
Eu1 Ge3 Ca1 91.07(5) 2 2_565 ? 
Ca1 Ge3 Ca1 91.07(5) 2 2_565 ? 
Eu1 Ge3 Ca1 0.00(6) 2_565 2_565 ? 
In1 Ge3 Ca1 71.00(3) 5_656 6_656 ? 
In1 Ge3 Ca1 71.00(3) 5_666 6_656 ? 
In1 Ge3 Ca1 119.85(4) 1_655 6_656 ? 
Eu1 Ge3 Ca1 80.19(4) 2 6_656 ? 
Ca1 Ge3 Ca1 80.19(4) 2 6_656 ? 
Eu1 Ge3 Ca1 80.19(4) 2_565 6_656 ? 
Ca1 Ge3 Ca1 80.19(4) 2_565 6_656 ? 
In1 Ge3 Eu1 71.00(3) 5_656 6_656 ? 
In1 Ge3 Eu1 71.00(3) 5_666 6_656 ? 
In1 Ge3 Eu1 119.85(4) 1_655 6_656 ? 
Eu1 Ge3 Eu1 80.19(4) 2 6_656 ? 
Ca1 Ge3 Eu1 80.19(4) 2 6_656 ? 
Eu1 Ge3 Eu1 80.19(4) 2_565 6_656 ? 
Ca1 Ge3 Eu1 80.19(4) 2_565 6_656 ? 
Ca1 Ge3 Eu1 0.00(4) 6_656 6_656 ? 
In1 Ge3 Eu2 138.56(4) 5_656 5_666 ? 
In1 Ge3 Eu2 71.11(3) 5_666 5_666 ? 
In1 Ge3 Eu2 65.57(3) 1_655 5_666 ? 
Eu1 Ge3 Eu2 129.97(4) 2 5_666 ? 
Ca1 Ge3 Eu2 129.97(4) 2 5_666 ? 
Eu1 Ge3 Eu2 71.44(3) 2_565 5_666 ? 
Ca1 Ge3 Eu2 71.44(3) 2_565 5_666 ? 
Ca1 Ge3 Eu2 137.536(19) 6_656 5_666 ? 
Eu1 Ge3 Eu2 137.536(19) 6_656 5_666 ? 
In1 Ge3 Ca2 138.56(4) 5_656 5_666 ? 
In1 Ge3 Ca2 71.11(3) 5_666 5_666 ? 
In1 Ge3 Ca2 65.57(3) 1_655 5_666 ? 
Eu1 Ge3 Ca2 129.97(4) 2 5_666 ? 
Ca1 Ge3 Ca2 129.97(4) 2 5_666 ? 
Eu1 Ge3 Ca2 71.44(3) 2_565 5_666 ? 
Ca1 Ge3 Ca2 71.44(3) 2_565 5_666 ? 
Ca1 Ge3 Ca2 137.536(19) 6_656 5_666 ? 
Eu1 Ge3 Ca2 137.536(19) 6_656 5_666 ? 
Eu2 Ge3 Ca2 0.00(3) 5_666 5_666 ? 
In1 Ge3 Ca2 71.11(3) 5_656 5_656 ? 
In1 Ge3 Ca2 138.56(4) 5_666 5_656 ? 
In1 Ge3 Ca2 65.57(3) 1_655 5_656 ? 
Eu1 Ge3 Ca2 71.44(3) 2 5_656 ? 
Ca1 Ge3 Ca2 71.44(3) 2 5_656 ? 
Eu1 Ge3 Ca2 129.97(4) 2_565 5_656 ? 
Ca1 Ge3 Ca2 129.97(4) 2_565 5_656 ? 
Ca1 Ge3 Ca2 137.536(19) 6_656 5_656 ? 
Eu1 Ge3 Ca2 137.536(19) 6_656 5_656 ? 
Eu2 Ge3 Ca2 84.60(4) 5_666 5_656 ? 
Ca2 Ge3 Ca2 84.60(4) 5_666 5_656 ? 
 
_diffrn_measured_fraction_theta_max    0.960 
_diffrn_reflns_theta_full              25.00 
_diffrn_measured_fraction_theta_full   1.000 
_refine_diff_density_max    1.566 
_refine_diff_density_min   -1.841 
_refine_diff_density_rms    0.403 

###

 
data_Eu0.30Ca2.70In2Ge3  
 
_audit_creation_method            SHELXL-97 
_chemical_name_systematic 
; 
 ? 
; 
_chemical_name_common             ? 
_chemical_melting_point           ? 
_chemical_formula_moiety          'Ca2.70 Eu0.30 Ge3 In2'  
_chemical_formula_sum 
 'Ca2.70 Eu0.30 Ge3 In2' 
_chemical_formula_weight          601.21 
 
loop_ 
 _atom_type_symbol 
 _atom_type_description 
 _atom_type_scat_dispersion_real 
 _atom_type_scat_dispersion_imag 
 _atom_type_scat_source 
 'Ca'  'Ca'   0.2262   0.3064 
 'International Tables Vol C Tables 4.2.6.8 and 6.1.1.4' 
 'Ge'  'Ge'   0.1547   1.8001 
 'International Tables Vol C Tables 4.2.6.8 and 6.1.1.4' 
 'In'  'In'  -0.7276   1.3100 
 'International Tables Vol C Tables 4.2.6.8 and 6.1.1.4' 
 'Eu'  'Eu'  -0.1578   3.6682 
 'International Tables Vol C Tables 4.2.6.8 and 6.1.1.4' 
 
_symmetry_cell_setting            Orthorhombic 
_symmetry_space_group_name_H-M    Pnma 
 
loop_ 
 _symmetry_equiv_pos_as_xyz 
 'x, y, z' 
 '-x+1/2, -y, z+1/2' 
 '-x, y+1/2, -z' 
 'x+1/2, -y+1/2, -z+1/2' 
 '-x, -y, -z' 
 'x-1/2, y, -z-1/2' 
 'x, -y-1/2, z' 
 '-x-1/2, y-1/2, z-1/2' 
 
_cell_length_a                    7.3819(19) 
_cell_length_b                    4.4519(12) 
_cell_length_c                    23.684(6) 
_cell_angle_alpha                 90.00 
_cell_angle_beta                  90.00 
_cell_angle_gamma                 90.00 
_cell_volume                      778.4(4) 
_cell_formula_units_Z             4 
_cell_measurement_temperature     200(2) 
_cell_measurement_reflns_used     905 
_cell_measurement_theta_min       4.66 
_cell_measurement_theta_max       18.62 
 
_exptl_crystal_description        'bar' 
_exptl_crystal_colour             'silver' 
_exptl_crystal_size_max           0.057 
_exptl_crystal_size_mid           0.035 
_exptl_crystal_size_min           0.025 
_exptl_crystal_density_meas       ? 
_exptl_crystal_density_diffrn     5.128 
_exptl_crystal_density_method     'not measured' 
_exptl_crystal_F_000              905 
_exptl_absorpt_coefficient_mu     21.311 
_exptl_absorpt_correction_type    empirical 
_exptl_absorpt_correction_T_min   0.0145 
_exptl_absorpt_correction_T_max   0.0356 
_exptl_absorpt_process_details    'SADABS' 
 
_exptl_special_details 
; 
 ? 
; 
 
_diffrn_ambient_temperature       200(2) 
_diffrn_radiation_wavelength      0.71073 
_diffrn_radiation_type            MoK\a 
_diffrn_radiation_source          'fine-focus sealed tube' 
_diffrn_radiation_monochromator   graphite 
_diffrn_measurement_device_type   'CCD area detector' 
_diffrn_measurement_method        'phi and omega scans' 
_diffrn_detector_area_resol_mean  ? 
_diffrn_standards_number          ? 
_diffrn_standards_interval_count  ? 
_diffrn_standards_interval_time   ? 
_diffrn_standards_decay_%         ? 
_diffrn_reflns_number             8922 
_diffrn_reflns_av_R_equivalents   0.1275 
_diffrn_reflns_av_sigmaI/netI     0.0621 
_diffrn_reflns_limit_h_min        -9 
_diffrn_reflns_limit_h_max        9 
_diffrn_reflns_limit_k_min        -5 
_diffrn_reflns_limit_k_max        5 
_diffrn_reflns_limit_l_min        -29 
_diffrn_reflns_limit_l_max        29 
_diffrn_reflns_theta_min          1.72 
_diffrn_reflns_theta_max          26.37 
_reflns_number_total              905 
_reflns_number_gt                 623 
_reflns_threshold_expression      >2sigma(I) 
 
_computing_data_collection        'Bruker SMART' 
_computing_cell_refinement        'Bruker SMART' 
_computing_data_reduction         'Bruker SAINT' 
_computing_structure_solution     'SHELXS-97 (Sheldrick, 1990)' 
_computing_structure_refinement   'SHELXL-97 (Sheldrick, 1997)' 
_computing_molecular_graphics     'Bruker SHELXTL' 
_computing_publication_material   'Bruker SHEMXTL'  
 
_refine_special_details 
; 
 Refinement of F^2^ against ALL reflections.  The weighted R-factor wR and 
 goodness of fit S are based on F^2^, conventional R-factors R are based 
 on F, with F set to zero for negative F^2^. The threshold expression of 
 F^2^ > 2sigma(F^2^) is used only for calculating R-factors(gt) etc. and is 
 not relevant to the choice of reflections for refinement.  R-factors based 
 on F^2^ are statistically about twice as large as those based on F, and R- 
 factors based on ALL data will be even larger. 
; 
 
_refine_ls_structure_factor_coef  Fsqd  
_refine_ls_matrix_type            full 
_refine_ls_weighting_scheme       calc  
_refine_ls_weighting_details 
 'calc w=1/[\s^2^(Fo^2^)+(0.0283P)^2^+0.0000P] where P=(Fo^2^+2Fc^2^)/3' 
_atom_sites_solution_primary      direct 
_atom_sites_solution_secondary    difmap 
_atom_sites_solution_hydrogens    . 
_refine_ls_hydrogen_treatment     . 
_refine_ls_extinction_method      SHELXL 
_refine_ls_extinction_coef        0.00039(9) 
_refine_ls_extinction_expression 
 'Fc^*^=kFc[1+0.001xFc^2^\l^3^/sin(2\q)]^-1/4^' 
_refine_ls_number_reflns          905 
_refine_ls_number_parameters      53 
_refine_ls_number_restraints      0 
_refine_ls_R_factor_all           0.0724 
_refine_ls_R_factor_gt            0.0370 
_refine_ls_wR_factor_ref          0.0738 
_refine_ls_wR_factor_gt           0.0665 
_refine_ls_goodness_of_fit_ref    1.007 
_refine_ls_restrained_S_all       1.007 
_refine_ls_shift/su_max           0.000 
_refine_ls_shift/su_mean          0.000 
 
loop_ 
 _atom_site_label 
 _atom_site_type_symbol 
 _atom_site_fract_x 
 _atom_site_fract_y 
 _atom_site_fract_z 
 _atom_site_U_iso_or_equiv 
 _atom_site_adp_type 
 _atom_site_occupancy 
 _atom_site_symmetry_multiplicity 
 _atom_site_calc_flag 
 _atom_site_refinement_flags 
 _atom_site_disorder_assembly 
 _atom_site_disorder_group 
Eu1 Eu 0.0121(3) 0.2500 0.07227(10) 0.0153(9) Uani 0.082(4) 2 d SP . . 
Ca1 Ca 0.0121(3) 0.2500 0.07227(10) 0.0153(9) Uani 0.918(4) 2 d SP . . 
Eu2 Eu 0.0246(3) 0.2500 0.38120(8) 0.0148(8) Uani 0.158(4) 2 d SP . . 
Ca2 Ca 0.0246(3) 0.2500 0.38120(8) 0.0148(8) Uani 0.842(4) 2 d SP . . 
Eu3 Eu 0.1652(3) 0.2500 0.22653(10) 0.0134(9) Uani 0.055(4) 2 d SP . . 
Ca3 Ca 0.1652(3) 0.2500 0.22653(10) 0.0134(9) Uani 0.945(4) 2 d SP . . 
In1 In 0.15018(14) 0.2500 0.52708(5) 0.0163(3) Uani 1 2 d S . . 
In2 In 0.16261(14) 0.2500 0.82606(5) 0.0180(3) Uani 1 2 d S . . 
Ge1 Ge 0.0372(2) 0.2500 0.71010(6) 0.0125(4) Uani 1 2 d S . . 
Ge2 Ge 0.2842(2) 0.2500 0.63586(6) 0.0128(4) Uani 1 2 d S . . 
Ge3 Ge 0.7645(2) 0.2500 0.53878(6) 0.0137(4) Uani 1 2 d S . . 
 
loop_ 
 _atom_site_aniso_label 
 _atom_site_aniso_U_11 
 _atom_site_aniso_U_22 
 _atom_site_aniso_U_33 
 _atom_site_aniso_U_23 
 _atom_site_aniso_U_13 
 _atom_site_aniso_U_12 
Eu1 0.0134(15) 0.0163(15) 0.0163(15) 0.000 -0.0005(10) 0.000 
Ca1 0.0134(15) 0.0163(15) 0.0163(15) 0.000 -0.0005(10) 0.000 
Eu2 0.0148(13) 0.0137(12) 0.0159(13) 0.000 -0.0010(9) 0.000 
Ca2 0.0148(13) 0.0137(12) 0.0159(13) 0.000 -0.0010(9) 0.000 
Eu3 0.0137(15) 0.0129(15) 0.0136(16) 0.000 0.0024(11) 0.000 
Ca3 0.0137(15) 0.0129(15) 0.0136(16) 0.000 0.0024(11) 0.000 
In1 0.0161(6) 0.0173(6) 0.0155(6) 0.000 -0.0005(5) 0.000 
In2 0.0132(6) 0.0240(6) 0.0167(6) 0.000 0.0000(5) 0.000 
Ge1 0.0131(8) 0.0125(8) 0.0119(8) 0.000 0.0008(7) 0.000 
Ge2 0.0130(9) 0.0114(8) 0.0141(9) 0.000 0.0008(6) 0.000 
Ge3 0.0126(8) 0.0119(8) 0.0165(9) 0.000 -0.0010(7) 0.000 
 
_geom_special_details 
; 
 All esds (except the esd in the dihedral angle between two l.s. planes) 
 are estimated using the full covariance matrix.  The cell esds are taken 
 into account individually in the estimation of esds in distances, angles 
 and torsion angles; correlations between esds in cell parameters are only 
 used when they are defined by crystal symmetry.  An approximate (isotropic) 
 treatment of cell esds is used for estimating esds involving l.s. planes. 
; 
 
loop_ 
 _geom_bond_atom_site_label_1 
 _geom_bond_atom_site_label_2 
 _geom_bond_distance 
 _geom_bond_site_symmetry_2 
 _geom_bond_publ_flag 
Eu1 Ge2 3.080(2) 2_564 ? 
Eu1 Ge2 3.080(2) 2_554 ? 
Eu1 Ge3 3.123(2) 2_554 ? 
Eu1 Ge3 3.123(2) 2_564 ? 
Eu1 Ge3 3.223(3) 6_556 ? 
Eu1 In1 3.510(2) 2_564 ? 
Eu1 In1 3.510(2) 2_554 ? 
Eu1 In2 3.524(2) 5_566 ? 
Eu1 In2 3.524(2) 5_556 ? 
Eu1 In1 3.560(3) 6_556 ? 
Eu1 Ca2 3.763(3) 6_556 ? 
Eu1 Eu2 3.763(3) 6_556 ? 
Eu2 Ge1 3.1367(18) 5_556 ? 
Eu2 Ge1 3.1367(18) 5_566 ? 
Eu2 Ge2 3.2115(19) 5_556 ? 
Eu2 Ge2 3.2115(19) 5_566 ? 
Eu2 Ge3 3.3121(19) 5_666 ? 
Eu2 Ge3 3.3121(19) 5_656 ? 
Eu2 In1 3.3673(18) 5_566 ? 
Eu2 In1 3.3673(18) 5_556 ? 
Eu2 In2 3.4628(19) 2_564 ? 
Eu2 In2 3.4628(19) 2_554 ? 
Eu2 In1 3.577(2) . ? 
Eu2 Ca3 3.681(3) 6_556 ? 
Eu3 Ge1 3.072(2) 5_566 ? 
Eu3 Ge1 3.072(2) 5_556 ? 
Eu3 Ge2 3.116(2) 2_554 ? 
Eu3 Ge2 3.116(2) 2_564 ? 
Eu3 Ge1 3.152(2) 2_564 ? 
Eu3 Ge1 3.152(2) 2_554 ? 
Eu3 In2 3.482(2) 2_564 ? 
Eu3 In2 3.482(2) 2_554 ? 
Eu3 In2 3.516(2) 5_556 ? 
Eu3 In2 3.516(2) 5_566 ? 
Eu3 Eu2 3.681(3) 6_656 ? 
Eu3 Ca2 3.681(3) 6_656 ? 
In1 Ge2 2.760(2) . ? 
In1 Ge3 2.7903(12) 5_656 ? 
In1 Ge3 2.7903(12) 5_666 ? 
In1 Ge3 2.861(2) 1_455 ? 
In1 Ca2 3.3673(18) 5_566 ? 
In1 Eu2 3.3673(18) 5_566 ? 
In1 Ca2 3.3673(18) 5_556 ? 
In1 Eu2 3.3673(18) 5_556 ? 
In1 Eu1 3.510(2) 2_565 ? 
In1 Ca1 3.510(2) 2_565 ? 
In1 Eu1 3.510(2) 2 ? 
In1 Ca1 3.510(2) 2 ? 
In2 Ge1 2.895(2) 6_657 ? 
In2 Ge1 2.898(2) . ? 
In2 Ge2 2.936(2) 6_557 ? 
In2 Ca2 3.4628(19) 2_565 ? 
In2 Eu2 3.4628(19) 2_565 ? 
In2 Ca2 3.4628(19) 2 ? 
In2 Eu2 3.4628(19) 2 ? 
In2 Ca3 3.482(2) 2 ? 
In2 Eu3 3.482(2) 2 ? 
In2 Ca3 3.482(2) 2_565 ? 
In2 Eu3 3.482(2) 2_565 ? 
In2 Eu3 3.516(2) 5_556 ? 
Ge1 Ge2 2.533(2) . ? 
Ge1 In2 2.895(2) 6_557 ? 
Ge1 Ca3 3.072(2) 5_566 ? 
Ge1 Eu3 3.072(2) 5_566 ? 
Ge1 Ca3 3.072(2) 5_556 ? 
Ge1 Eu3 3.072(2) 5_556 ? 
Ge1 Eu2 3.1367(18) 5_556 ? 
Ge1 Ca2 3.1367(18) 5_556 ? 
Ge1 Eu2 3.1367(18) 5_566 ? 
Ge1 Ca2 3.1367(18) 5_566 ? 
Ge1 Ca3 3.152(2) 2_565 ? 
Ge2 In2 2.936(2) 6_657 ? 
Ge2 Eu1 3.080(2) 2 ? 
Ge2 Eu1 3.080(2) 2_565 ? 
Ge2 Ca1 3.080(2) 2 ? 
Ge2 Ca1 3.080(2) 2_565 ? 
Ge2 Ca3 3.116(2) 2_565 ? 
Ge2 Eu3 3.116(2) 2_565 ? 
Ge2 Ca3 3.116(2) 2 ? 
Ge2 Eu3 3.116(2) 2 ? 
Ge2 Eu2 3.2115(19) 5_556 ? 
Ge3 In1 2.7903(12) 5_656 ? 
Ge3 In1 2.7903(12) 5_666 ? 
Ge3 In1 2.861(2) 1_655 ? 
Ge3 Eu1 3.123(2) 2 ? 
Ge3 Ca1 3.123(2) 2 ? 
Ge3 Eu1 3.123(2) 2_565 ? 
Ge3 Ca1 3.123(2) 2_565 ? 
Ge3 Ca1 3.223(3) 6_656 ? 
Ge3 Eu1 3.223(3) 6_656 ? 
Ge3 Eu2 3.3121(19) 5_666 ? 
Ge3 Ca2 3.3121(19) 5_666 ? 
Ge3 Ca2 3.3121(19) 5_656 ? 
 
loop_ 
 _geom_angle_atom_site_label_1 
 _geom_angle_atom_site_label_2 
 _geom_angle_atom_site_label_3 
 _geom_angle 
 _geom_angle_site_symmetry_1 
 _geom_angle_site_symmetry_3 
 _geom_angle_publ_flag 
Ge2 Eu1 Ge2 92.56(8) 2_564 2_554 ? 
Ge2 Eu1 Ge3 163.47(9) 2_564 2_554 ? 
Ge2 Eu1 Ge3 85.89(4) 2_554 2_554 ? 
Ge2 Eu1 Ge3 85.89(4) 2_564 2_564 ? 
Ge2 Eu1 Ge3 163.47(9) 2_554 2_564 ? 
Ge3 Eu1 Ge3 90.93(8) 2_554 2_564 ? 
Ge2 Eu1 Ge3 96.70(6) 2_564 6_556 ? 
Ge2 Eu1 Ge3 96.70(6) 2_554 6_556 ? 
Ge3 Eu1 Ge3 99.82(6) 2_554 6_556 ? 
Ge3 Eu1 Ge3 99.82(6) 2_564 6_556 ? 
Ge2 Eu1 In1 48.99(4) 2_564 2_564 ? 
Ge2 Eu1 In1 105.10(7) 2_554 2_564 ? 
Ge3 Eu1 In1 147.04(8) 2_554 2_564 ? 
Ge3 Eu1 In1 86.26(4) 2_564 2_564 ? 
Ge3 Eu1 In1 48.74(4) 6_556 2_564 ? 
Ge2 Eu1 In1 105.10(7) 2_564 2_554 ? 
Ge2 Eu1 In1 48.99(4) 2_554 2_554 ? 
Ge3 Eu1 In1 86.26(4) 2_554 2_554 ? 
Ge3 Eu1 In1 147.04(8) 2_564 2_554 ? 
Ge3 Eu1 In1 48.74(4) 6_556 2_554 ? 
In1 Eu1 In1 78.73(5) 2_564 2_554 ? 
Ge2 Eu1 In2 52.27(4) 2_564 5_566 ? 
Ge2 Eu1 In2 107.53(7) 2_554 5_566 ? 
Ge3 Eu1 In2 112.62(8) 2_554 5_566 ? 
Ge3 Eu1 In2 58.94(4) 2_564 5_566 ? 
Ge3 Eu1 In2 140.28(3) 6_556 5_566 ? 
In1 Eu1 In2 93.88(3) 2_564 5_566 ? 
In1 Eu1 In2 150.35(8) 2_554 5_566 ? 
Ge2 Eu1 In2 107.53(7) 2_564 5_556 ? 
Ge2 Eu1 In2 52.27(4) 2_554 5_556 ? 
Ge3 Eu1 In2 58.94(4) 2_554 5_556 ? 
Ge3 Eu1 In2 112.62(8) 2_564 5_556 ? 
Ge3 Eu1 In2 140.28(3) 6_556 5_556 ? 
In1 Eu1 In2 150.35(8) 2_564 5_556 ? 
In1 Eu1 In2 93.88(3) 2_554 5_556 ? 
In2 Eu1 In2 78.36(6) 5_566 5_556 ? 
Ge2 Eu1 In1 133.61(4) 2_564 6_556 ? 
Ge2 Eu1 In1 133.61(4) 2_554 6_556 ? 
Ge3 Eu1 In1 48.82(4) 2_554 6_556 ? 
Ge3 Eu1 In1 48.82(4) 2_564 6_556 ? 
Ge3 Eu1 In1 83.94(6) 6_556 6_556 ? 
In1 Eu1 In1 109.36(6) 2_564 6_556 ? 
In1 Eu1 In1 109.36(6) 2_554 6_556 ? 
In2 Eu1 In1 100.20(6) 5_566 6_556 ? 
In2 Eu1 In1 100.20(6) 5_556 6_556 ? 
Ge2 Eu1 Ca2 108.89(6) 2_564 6_556 ? 
Ge2 Eu1 Ca2 108.89(6) 2_554 6_556 ? 
Ge3 Eu1 Ca2 56.59(5) 2_554 6_556 ? 
Ge3 Eu1 Ca2 56.59(5) 2_564 6_556 ? 
Ge3 Eu1 Ca2 142.34(8) 6_556 6_556 ? 
In1 Eu1 Ca2 140.23(3) 2_564 6_556 ? 
In1 Eu1 Ca2 140.23(3) 2_554 6_556 ? 
In2 Eu1 Ca2 56.63(4) 5_566 6_556 ? 
In2 Eu1 Ca2 56.63(4) 5_556 6_556 ? 
In1 Eu1 Ca2 58.40(5) 6_556 6_556 ? 
Ge2 Eu1 Eu2 108.89(6) 2_564 6_556 ? 
Ge2 Eu1 Eu2 108.89(6) 2_554 6_556 ? 
Ge3 Eu1 Eu2 56.59(5) 2_554 6_556 ? 
Ge3 Eu1 Eu2 56.59(5) 2_564 6_556 ? 
Ge3 Eu1 Eu2 142.34(8) 6_556 6_556 ? 
In1 Eu1 Eu2 140.23(3) 2_564 6_556 ? 
In1 Eu1 Eu2 140.23(3) 2_554 6_556 ? 
In2 Eu1 Eu2 56.63(4) 5_566 6_556 ? 
In2 Eu1 Eu2 56.63(4) 5_556 6_556 ? 
In1 Eu1 Eu2 58.40(5) 6_556 6_556 ? 
Ca2 Eu1 Eu2 0.00(6) 6_556 6_556 ? 
Ge1 Eu2 Ge1 90.41(7) 5_556 5_566 ? 
Ge1 Eu2 Ge2 47.01(4) 5_556 5_556 ? 
Ge1 Eu2 Ge2 107.57(7) 5_566 5_556 ? 
Ge1 Eu2 Ge2 107.57(7) 5_556 5_566 ? 
Ge1 Eu2 Ge2 47.01(4) 5_566 5_566 ? 
Ge2 Eu2 Ge2 87.75(7) 5_556 5_566 ? 
Ge1 Eu2 Ge3 160.00(8) 5_556 5_666 ? 
Ge1 Eu2 Ge3 89.19(4) 5_566 5_666 ? 
Ge2 Eu2 Ge3 150.63(7) 5_556 5_666 ? 
Ge2 Eu2 Ge3 86.55(4) 5_566 5_666 ? 
Ge1 Eu2 Ge3 89.19(4) 5_556 5_656 ? 
Ge1 Eu2 Ge3 160.00(8) 5_566 5_656 ? 
Ge2 Eu2 Ge3 86.55(4) 5_556 5_656 ? 
Ge2 Eu2 Ge3 150.63(7) 5_566 5_656 ? 
Ge3 Eu2 Ge3 84.45(6) 5_666 5_656 ? 
Ge1 Eu2 In1 149.10(8) 5_556 5_566 ? 
Ge1 Eu2 In1 85.40(4) 5_566 5_566 ? 
Ge2 Eu2 In1 105.51(6) 5_556 5_566 ? 
Ge2 Eu2 In1 49.53(4) 5_566 5_566 ? 
Ge3 Eu2 In1 50.71(4) 5_666 5_566 ? 
Ge3 Eu2 In1 104.79(6) 5_656 5_566 ? 
Ge1 Eu2 In1 85.40(4) 5_556 5_556 ? 
Ge1 Eu2 In1 149.10(8) 5_566 5_556 ? 
Ge2 Eu2 In1 49.53(4) 5_556 5_556 ? 
Ge2 Eu2 In1 105.51(6) 5_566 5_556 ? 
Ge3 Eu2 In1 104.79(6) 5_666 5_556 ? 
Ge3 Eu2 In1 50.71(4) 5_656 5_556 ? 
In1 Eu2 In1 82.76(5) 5_566 5_556 ? 
Ge1 Eu2 In2 107.05(6) 5_556 2_564 ? 
Ge1 Eu2 In2 51.74(4) 5_566 2_564 ? 
Ge2 Eu2 In2 150.61(7) 5_556 2_564 ? 
Ge2 Eu2 In2 88.87(4) 5_566 2_564 ? 
Ge3 Eu2 In2 58.02(4) 5_666 2_564 ? 
Ge3 Eu2 In2 109.53(7) 5_656 2_564 ? 
In1 Eu2 In2 94.24(3) 5_566 2_564 ? 
In1 Eu2 In2 157.48(7) 5_556 2_564 ? 
Ge1 Eu2 In2 51.74(4) 5_556 2_554 ? 
Ge1 Eu2 In2 107.05(6) 5_566 2_554 ? 
Ge2 Eu2 In2 88.87(4) 5_556 2_554 ? 
Ge2 Eu2 In2 150.61(7) 5_566 2_554 ? 
Ge3 Eu2 In2 109.53(7) 5_666 2_554 ? 
Ge3 Eu2 In2 58.02(4) 5_656 2_554 ? 
In1 Eu2 In2 157.48(7) 5_566 2_554 ? 
In1 Eu2 In2 94.24(3) 5_556 2_554 ? 
In2 Eu2 In2 80.00(5) 2_564 2_554 ? 
Ge1 Eu2 In1 134.71(3) 5_556 . ? 
Ge1 Eu2 In1 134.71(3) 5_566 . ? 
Ge2 Eu2 In1 107.79(5) 5_556 . ? 
Ge2 Eu2 In1 107.79(5) 5_566 . ? 
Ge3 Eu2 In1 47.59(3) 5_666 . ? 
Ge3 Eu2 In1 47.59(3) 5_656 . ? 
In1 Eu2 In1 58.41(4) 5_566 . ? 
In1 Eu2 In1 58.41(4) 5_556 . ? 
In2 Eu2 In1 101.04(5) 2_564 . ? 
In2 Eu2 In1 101.04(5) 2_554 . ? 
Ge1 Eu2 Ca3 54.36(4) 5_556 6_556 ? 
Ge1 Eu2 Ca3 54.36(4) 5_566 6_556 ? 
Ge2 Eu2 Ca3 53.22(4) 5_556 6_556 ? 
Ge2 Eu2 Ca3 53.22(4) 5_566 6_556 ? 
Ge3 Eu2 Ca3 137.34(3) 5_666 6_556 ? 
Ge3 Eu2 Ca3 137.34(3) 5_656 6_556 ? 
In1 Eu2 Ca3 99.84(6) 5_566 6_556 ? 
In1 Eu2 Ca3 99.84(6) 5_556 6_556 ? 
In2 Eu2 Ca3 102.66(6) 2_564 6_556 ? 
In2 Eu2 Ca3 102.66(6) 2_554 6_556 ? 
In1 Eu2 Ca3 148.90(7) . 6_556 ? 
Ge1 Eu3 Ge1 92.86(8) 5_566 5_556 ? 
Ge1 Eu3 Ge2 155.89(10) 5_566 2_554 ? 
Ge1 Eu3 Ge2 82.96(4) 5_556 2_554 ? 
Ge1 Eu3 Ge2 82.96(4) 5_566 2_564 ? 
Ge1 Eu3 Ge2 155.89(10) 5_556 2_564 ? 
Ge2 Eu3 Ge2 91.20(8) 2_554 2_564 ? 
Ge1 Eu3 Ge1 83.55(3) 5_566 2_564 ? 
Ge1 Eu3 Ge1 155.64(9) 5_556 2_564 ? 
Ge2 Eu3 Ge1 109.62(8) 2_554 2_564 ? 
Ge2 Eu3 Ge1 47.67(4) 2_564 2_564 ? 
Ge1 Eu3 Ge1 155.64(9) 5_566 2_554 ? 
Ge1 Eu3 Ge1 83.55(3) 5_556 2_554 ? 
Ge2 Eu3 Ge1 47.67(4) 2_554 2_554 ? 
Ge2 Eu3 Ge1 109.62(8) 2_564 2_554 ? 
Ge1 Eu3 Ge1 89.86(8) 2_564 2_554 ? 
Ge1 Eu3 In2 51.95(4) 5_566 2_564 ? 
Ge1 Eu3 In2 108.05(8) 5_556 2_564 ? 
Ge2 Eu3 In2 151.58(9) 2_554 2_564 ? 
Ge2 Eu3 In2 88.06(4) 2_564 2_564 ? 
Ge1 Eu3 In2 51.52(4) 2_564 2_564 ? 
Ge1 Eu3 In2 106.30(8) 2_554 2_564 ? 
Ge1 Eu3 In2 108.05(8) 5_566 2_554 ? 
Ge1 Eu3 In2 51.95(4) 5_556 2_554 ? 
Ge2 Eu3 In2 88.06(4) 2_554 2_554 ? 
Ge2 Eu3 In2 151.58(9) 2_564 2_554 ? 
Ge1 Eu3 In2 106.30(8) 2_564 2_554 ? 
Ge1 Eu3 In2 51.52(4) 2_554 2_554 ? 
In2 Eu3 In2 79.46(6) 2_564 2_554 ? 
Ge1 Eu3 In2 107.28(8) 5_566 5_556 ? 
Ge1 Eu3 In2 51.67(4) 5_556 5_556 ? 
Ge2 Eu3 In2 52.12(4) 2_554 5_556 ? 
Ge2 Eu3 In2 106.90(8) 2_564 5_556 ? 
Ge1 Eu3 In2 152.02(9) 2_564 5_556 ? 
Ge1 Eu3 In2 89.36(4) 2_554 5_556 ? 
In2 Eu3 In2 153.60(8) 2_564 5_556 ? 
In2 Eu3 In2 94.95(3) 2_554 5_556 ? 
Ge1 Eu3 In2 51.67(4) 5_566 5_566 ? 
Ge1 Eu3 In2 107.28(8) 5_556 5_566 ? 
Ge2 Eu3 In2 106.90(8) 2_554 5_566 ? 
Ge2 Eu3 In2 52.12(4) 2_564 5_566 ? 
Ge1 Eu3 In2 89.36(4) 2_564 5_566 ? 
Ge1 Eu3 In2 152.02(9) 2_554 5_566 ? 
In2 Eu3 In2 94.95(3) 2_564 5_566 ? 
In2 Eu3 In2 153.60(8) 2_554 5_566 ? 
In2 Eu3 In2 78.56(6) 5_556 5_566 ? 
Ge1 Eu3 Eu2 133.56(4) 5_566 6_656 ? 
Ge1 Eu3 Eu2 133.56(4) 5_556 6_656 ? 
Ge2 Eu3 Eu2 55.65(5) 2_554 6_656 ? 
Ge2 Eu3 Eu2 55.65(5) 2_564 6_656 ? 
Ge1 Eu3 Eu2 53.98(5) 2_564 6_656 ? 
Ge1 Eu3 Eu2 53.98(5) 2_554 6_656 ? 
In2 Eu3 Eu2 101.90(6) 2_564 6_656 ? 
In2 Eu3 Eu2 101.90(6) 2_554 6_656 ? 
In2 Eu3 Eu2 104.51(6) 5_556 6_656 ? 
In2 Eu3 Eu2 104.51(6) 5_566 6_656 ? 
Ge1 Eu3 Ca2 133.56(4) 5_566 6_656 ? 
Ge1 Eu3 Ca2 133.56(4) 5_556 6_656 ? 
Ge2 Eu3 Ca2 55.65(5) 2_554 6_656 ? 
Ge2 Eu3 Ca2 55.65(5) 2_564 6_656 ? 
Ge1 Eu3 Ca2 53.98(5) 2_564 6_656 ? 
Ge1 Eu3 Ca2 53.98(5) 2_554 6_656 ? 
In2 Eu3 Ca2 101.90(6) 2_564 6_656 ? 
In2 Eu3 Ca2 101.90(6) 2_554 6_656 ? 
In2 Eu3 Ca2 104.51(6) 5_556 6_656 ? 
In2 Eu3 Ca2 104.51(6) 5_566 6_656 ? 
Eu2 Eu3 Ca2 0.00(4) 6_656 6_656 ? 
Ge2 In1 Ge3 116.17(4) . 5_656 ? 
Ge2 In1 Ge3 116.17(4) . 5_666 ? 
Ge3 In1 Ge3 105.83(6) 5_656 5_666 ? 
Ge2 In1 Ge3 105.44(6) . 1_455 ? 
Ge3 In1 Ge3 106.20(4) 5_656 1_455 ? 
Ge3 In1 Ge3 106.20(4) 5_666 1_455 ? 
Ge2 In1 Ca2 62.30(4) . 5_566 ? 
Ge3 In1 Ca2 167.05(5) 5_656 5_566 ? 
Ge3 In1 Ca2 85.40(4) 5_666 5_566 ? 
Ge3 In1 Ca2 63.65(4) 1_455 5_566 ? 
Ge2 In1 Eu2 62.30(4) . 5_566 ? 
Ge3 In1 Eu2 167.05(5) 5_656 5_566 ? 
Ge3 In1 Eu2 85.40(4) 5_666 5_566 ? 
Ge3 In1 Eu2 63.65(4) 1_455 5_566 ? 
Ca2 In1 Eu2 0.00(8) 5_566 5_566 ? 
Ge2 In1 Ca2 62.30(4) . 5_556 ? 
Ge3 In1 Ca2 85.40(4) 5_656 5_556 ? 
Ge3 In1 Ca2 167.05(5) 5_666 5_556 ? 
Ge3 In1 Ca2 63.65(4) 1_455 5_556 ? 
Ca2 In1 Ca2 82.76(5) 5_566 5_556 ? 
Eu2 In1 Ca2 82.76(5) 5_566 5_556 ? 
Ge2 In1 Eu2 62.30(4) . 5_556 ? 
Ge3 In1 Eu2 85.40(4) 5_656 5_556 ? 
Ge3 In1 Eu2 167.05(5) 5_666 5_556 ? 
Ge3 In1 Eu2 63.65(4) 1_455 5_556 ? 
Ca2 In1 Eu2 82.76(5) 5_566 5_556 ? 
Eu2 In1 Eu2 82.76(5) 5_566 5_556 ? 
Ca2 In1 Eu2 0.00(6) 5_556 5_556 ? 
Ge2 In1 Eu1 57.36(4) . 2_565 ? 
Ge3 In1 Eu1 121.07(6) 5_656 2_565 ? 
Ge3 In1 Eu1 60.27(5) 5_666 2_565 ? 
Ge3 In1 Eu1 132.65(4) 1_455 2_565 ? 
Ca2 In1 Eu1 69.89(5) 5_566 2_565 ? 
Eu2 In1 Eu1 69.89(5) 5_566 2_565 ? 
Ca2 In1 Eu1 119.66(6) 5_556 2_565 ? 
Eu2 In1 Eu1 119.66(6) 5_556 2_565 ? 
Ge2 In1 Ca1 57.36(4) . 2_565 ? 
Ge3 In1 Ca1 121.07(6) 5_656 2_565 ? 
Ge3 In1 Ca1 60.27(5) 5_666 2_565 ? 
Ge3 In1 Ca1 132.65(4) 1_455 2_565 ? 
Ca2 In1 Ca1 69.89(5) 5_566 2_565 ? 
Eu2 In1 Ca1 69.89(5) 5_566 2_565 ? 
Ca2 In1 Ca1 119.66(6) 5_556 2_565 ? 
Eu2 In1 Ca1 119.66(6) 5_556 2_565 ? 
Eu1 In1 Ca1 0.00(7) 2_565 2_565 ? 
Ge2 In1 Eu1 57.36(4) . 2 ? 
Ge3 In1 Eu1 60.27(5) 5_656 2 ? 
Ge3 In1 Eu1 121.07(6) 5_666 2 ? 
Ge3 In1 Eu1 132.65(4) 1_455 2 ? 
Ca2 In1 Eu1 119.66(6) 5_566 2 ? 
Eu2 In1 Eu1 119.66(6) 5_566 2 ? 
Ca2 In1 Eu1 69.89(5) 5_556 2 ? 
Eu2 In1 Eu1 69.89(5) 5_556 2 ? 
Eu1 In1 Eu1 78.73(6) 2_565 2 ? 
Ca1 In1 Eu1 78.73(6) 2_565 2 ? 
Ge2 In1 Ca1 57.36(4) . 2 ? 
Ge3 In1 Ca1 60.27(5) 5_656 2 ? 
Ge3 In1 Ca1 121.07(6) 5_666 2 ? 
Ge3 In1 Ca1 132.65(4) 1_455 2 ? 
Ca2 In1 Ca1 119.66(6) 5_566 2 ? 
Eu2 In1 Ca1 119.66(6) 5_566 2 ? 
Ca2 In1 Ca1 69.89(5) 5_556 2 ? 
Eu2 In1 Ca1 69.89(5) 5_556 2 ? 
Eu1 In1 Ca1 78.73(6) 2_565 2 ? 
Ca1 In1 Ca1 78.73(6) 2_565 2 ? 
Eu1 In1 Ca1 0.00(7) 2 2 ? 
Ge1 In2 Ge1 91.42(4) 6_657 . ? 
Ge1 In2 Ge2 179.32(6) 6_657 6_557 ? 
Ge1 In2 Ge2 89.26(6) . 6_557 ? 
Ge1 In2 Ca2 58.31(4) 6_657 2_565 ? 
Ge1 In2 Ca2 124.78(5) . 2_565 ? 
Ge2 In2 Ca2 121.24(5) 6_557 2_565 ? 
Ge1 In2 Eu2 58.31(4) 6_657 2_565 ? 
Ge1 In2 Eu2 124.78(5) . 2_565 ? 
Ge2 In2 Eu2 121.24(5) 6_557 2_565 ? 
Ca2 In2 Eu2 0.00(6) 2_565 2_565 ? 
Ge1 In2 Ca2 58.31(4) 6_657 2 ? 
Ge1 In2 Ca2 124.78(4) . 2 ? 
Ge2 In2 Ca2 121.24(5) 6_557 2 ? 
Ca2 In2 Ca2 80.00(5) 2_565 2 ? 
Eu2 In2 Ca2 80.00(5) 2_565 2 ? 
Ge1 In2 Eu2 58.31(4) 6_657 2 ? 
Ge1 In2 Eu2 124.78(4) . 2 ? 
Ge2 In2 Eu2 121.24(5) 6_557 2 ? 
Ca2 In2 Eu2 80.00(5) 2_565 2 ? 
Eu2 In2 Eu2 80.00(5) 2_565 2 ? 
Ca2 In2 Eu2 0.00(6) 2 2 ? 
Ge1 In2 Ca3 56.71(4) 6_657 2 ? 
Ge1 In2 Ca3 58.34(5) . 2 ? 
Ge2 In2 Ca3 123.73(5) 6_557 2 ? 
Ca2 In2 Ca3 115.01(6) 2_565 2 ? 
Eu2 In2 Ca3 115.01(6) 2_565 2 ? 
Ca2 In2 Ca3 66.49(5) 2 2 ? 
Eu2 In2 Ca3 66.49(5) 2 2 ? 
Ge1 In2 Eu3 56.71(4) 6_657 2 ? 
Ge1 In2 Eu3 58.34(5) . 2 ? 
Ge2 In2 Eu3 123.73(5) 6_557 2 ? 
Ca2 In2 Eu3 115.01(6) 2_565 2 ? 
Eu2 In2 Eu3 115.01(6) 2_565 2 ? 
Ca2 In2 Eu3 66.49(5) 2 2 ? 
Eu2 In2 Eu3 66.49(5) 2 2 ? 
Ca3 In2 Eu3 0.00(6) 2 2 ? 
Ge1 In2 Ca3 56.71(4) 6_657 2_565 ? 
Ge1 In2 Ca3 58.34(5) . 2_565 ? 
Ge2 In2 Ca3 123.73(5) 6_557 2_565 ? 
Ca2 In2 Ca3 66.49(5) 2_565 2_565 ? 
Eu2 In2 Ca3 66.49(5) 2_565 2_565 ? 
Ca2 In2 Ca3 115.01(6) 2 2_565 ? 
Eu2 In2 Ca3 115.01(6) 2 2_565 ? 
Ca3 In2 Ca3 79.46(6) 2 2_565 ? 
Eu3 In2 Ca3 79.46(6) 2 2_565 ? 
Ge1 In2 Eu3 56.71(4) 6_657 2_565 ? 
Ge1 In2 Eu3 58.34(5) . 2_565 ? 
Ge2 In2 Eu3 123.73(5) 6_557 2_565 ? 
Ca2 In2 Eu3 66.49(5) 2_565 2_565 ? 
Eu2 In2 Eu3 66.49(5) 2_565 2_565 ? 
Ca2 In2 Eu3 115.01(6) 2 2_565 ? 
Eu2 In2 Eu3 115.01(6) 2 2_565 ? 
Ca3 In2 Eu3 79.46(6) 2 2_565 ? 
Eu3 In2 Eu3 79.46(6) 2 2_565 ? 
Ca3 In2 Eu3 0.00(6) 2_565 2_565 ? 
Ge1 In2 Eu3 123.55(5) 6_657 5_556 ? 
Ge1 In2 Eu3 56.25(5) . 5_556 ? 
Ge2 In2 Eu3 56.90(5) 6_557 5_556 ? 
Ca2 In2 Eu3 178.12(6) 2_565 5_556 ? 
Eu2 In2 Eu3 178.12(6) 2_565 5_556 ? 
Ca2 In2 Eu3 100.69(4) 2 5_556 ? 
Eu2 In2 Eu3 100.69(4) 2 5_556 ? 
Ca3 In2 Eu3 66.84(3) 2 5_556 ? 
Eu3 In2 Eu3 66.84(3) 2 5_556 ? 
Ca3 In2 Eu3 114.59(4) 2_565 5_556 ? 
Eu3 In2 Eu3 114.59(4) 2_565 5_556 ? 
Ge2 Ge1 In2 118.83(7) . 6_557 ? 
Ge2 Ge1 In2 115.33(7) . . ? 
In2 Ge1 In2 125.84(6) 6_557 . ? 
Ge2 Ge1 Ca3 133.56(4) . 5_566 ? 
In2 Ge1 Ca3 71.34(6) 6_557 5_566 ? 
In2 Ge1 Ca3 72.09(6) . 5_566 ? 
Ge2 Ge1 Eu3 133.56(4) . 5_566 ? 
In2 Ge1 Eu3 71.34(6) 6_557 5_566 ? 
In2 Ge1 Eu3 72.09(6) . 5_566 ? 
Ca3 Ge1 Eu3 0.00(11) 5_566 5_566 ? 
Ge2 Ge1 Ca3 133.56(4) . 5_556 ? 
In2 Ge1 Ca3 71.34(6) 6_557 5_556 ? 
In2 Ge1 Ca3 72.09(6) . 5_556 ? 
Ca3 Ge1 Ca3 92.86(8) 5_566 5_556 ? 
Eu3 Ge1 Ca3 92.86(8) 5_566 5_556 ? 
Ge2 Ge1 Eu3 133.56(4) . 5_556 ? 
In2 Ge1 Eu3 71.34(6) 6_557 5_556 ? 
In2 Ge1 Eu3 72.09(6) . 5_556 ? 
Ca3 Ge1 Eu3 92.86(8) 5_566 5_556 ? 
Eu3 Ge1 Eu3 92.86(8) 5_566 5_556 ? 
Ca3 Ge1 Eu3 0.00(8) 5_556 5_556 ? 
Ge2 Ge1 Eu2 68.05(5) . 5_556 ? 
In2 Ge1 Eu2 69.95(5) 6_557 5_556 ? 
In2 Ge1 Eu2 134.40(3) . 5_556 ? 
Ca3 Ge1 Eu2 141.28(8) 5_566 5_556 ? 
Eu3 Ge1 Eu2 141.28(8) 5_566 5_556 ? 
Ca3 Ge1 Eu2 75.64(5) 5_556 5_556 ? 
Eu3 Ge1 Eu2 75.64(5) 5_556 5_556 ? 
Ge2 Ge1 Ca2 68.05(5) . 5_556 ? 
In2 Ge1 Ca2 69.95(5) 6_557 5_556 ? 
In2 Ge1 Ca2 134.40(3) . 5_556 ? 
Ca3 Ge1 Ca2 141.28(8) 5_566 5_556 ? 
Eu3 Ge1 Ca2 141.28(8) 5_566 5_556 ? 
Ca3 Ge1 Ca2 75.64(5) 5_556 5_556 ? 
Eu3 Ge1 Ca2 75.64(5) 5_556 5_556 ? 
Eu2 Ge1 Ca2 0.00(7) 5_556 5_556 ? 
Ge2 Ge1 Eu2 68.05(5) . 5_566 ? 
In2 Ge1 Eu2 69.95(5) 6_557 5_566 ? 
In2 Ge1 Eu2 134.40(3) . 5_566 ? 
Ca3 Ge1 Eu2 75.64(5) 5_566 5_566 ? 
Eu3 Ge1 Eu2 75.64(5) 5_566 5_566 ? 
Ca3 Ge1 Eu2 141.28(8) 5_556 5_566 ? 
Eu3 Ge1 Eu2 141.28(8) 5_556 5_566 ? 
Eu2 Ge1 Eu2 90.41(7) 5_556 5_566 ? 
Ca2 Ge1 Eu2 90.41(7) 5_556 5_566 ? 
Ge2 Ge1 Ca2 68.05(5) . 5_566 ? 
In2 Ge1 Ca2 69.95(5) 6_557 5_566 ? 
In2 Ge1 Ca2 134.40(3) . 5_566 ? 
Ca3 Ge1 Ca2 75.64(5) 5_566 5_566 ? 
Eu3 Ge1 Ca2 75.64(5) 5_566 5_566 ? 
Ca3 Ge1 Ca2 141.28(8) 5_556 5_566 ? 
Eu3 Ge1 Ca2 141.28(8) 5_556 5_566 ? 
Eu2 Ge1 Ca2 90.41(7) 5_556 5_566 ? 
Ca2 Ge1 Ca2 90.41(7) 5_556 5_566 ? 
Eu2 Ge1 Ca2 0.00(9) 5_566 5_566 ? 
Ge2 Ge1 Ca3 65.42(6) . 2_565 ? 
In2 Ge1 Ca3 134.62(4) 6_557 2_565 ? 
In2 Ge1 Ca3 70.14(6) . 2_565 ? 
Ca3 Ge1 Ca3 76.52(3) 5_566 2_565 ? 
Eu3 Ge1 Ca3 76.52(3) 5_566 2_565 ? 
Ca3 Ge1 Ca3 142.21(6) 5_556 2_565 ? 
Eu3 Ge1 Ca3 142.21(6) 5_556 2_565 ? 
Eu2 Ge1 Ca3 133.45(7) 5_556 2_565 ? 
Ca2 Ge1 Ca3 133.45(7) 5_556 2_565 ? 
Eu2 Ge1 Ca3 71.66(5) 5_566 2_565 ? 
Ca2 Ge1 Ca3 71.66(5) 5_566 2_565 ? 
Ge1 Ge2 In1 112.96(7) . . ? 
Ge1 Ge2 In2 118.15(7) . 6_657 ? 
In1 Ge2 In2 128.89(6) . 6_657 ? 
Ge1 Ge2 Eu1 133.71(4) . 2 ? 
In1 Ge2 Eu1 73.65(5) . 2 ? 
In2 Ge2 Eu1 71.67(6) 6_657 2 ? 
Ge1 Ge2 Eu1 133.71(4) . 2_565 ? 
In1 Ge2 Eu1 73.65(5) . 2_565 ? 
In2 Ge2 Eu1 71.67(6) 6_657 2_565 ? 
Eu1 Ge2 Eu1 92.56(8) 2 2_565 ? 
Ge1 Ge2 Ca1 133.71(4) . 2 ? 
In1 Ge2 Ca1 73.65(5) . 2 ? 
In2 Ge2 Ca1 71.67(6) 6_657 2 ? 
Eu1 Ge2 Ca1 0.00(7) 2 2 ? 
Eu1 Ge2 Ca1 92.56(8) 2_565 2 ? 
Ge1 Ge2 Ca1 133.71(4) . 2_565 ? 
In1 Ge2 Ca1 73.65(5) . 2_565 ? 
In2 Ge2 Ca1 71.67(6) 6_657 2_565 ? 
Eu1 Ge2 Ca1 92.56(8) 2 2_565 ? 
Eu1 Ge2 Ca1 0.00(7) 2_565 2_565 ? 
Ca1 Ge2 Ca1 92.56(8) 2 2_565 ? 
Ge1 Ge2 Ca3 66.91(6) . 2_565 ? 
In1 Ge2 Ca3 133.36(4) . 2_565 ? 
In2 Ge2 Ca3 70.98(6) 6_657 2_565 ? 
Eu1 Ge2 Ca3 142.64(8) 2 2_565 ? 
Eu1 Ge2 Ca3 76.24(6) 2_565 2_565 ? 
Ca1 Ge2 Ca3 142.64(8) 2 2_565 ? 
Ca1 Ge2 Ca3 76.24(6) 2_565 2_565 ? 
Ge1 Ge2 Eu3 66.91(6) . 2_565 ? 
In1 Ge2 Eu3 133.36(4) . 2_565 ? 
In2 Ge2 Eu3 70.98(6) 6_657 2_565 ? 
Eu1 Ge2 Eu3 142.64(8) 2 2_565 ? 
Eu1 Ge2 Eu3 76.24(6) 2_565 2_565 ? 
Ca1 Ge2 Eu3 142.64(8) 2 2_565 ? 
Ca1 Ge2 Eu3 76.24(6) 2_565 2_565 ? 
Ca3 Ge2 Eu3 0.00(7) 2_565 2_565 ? 
Ge1 Ge2 Ca3 66.91(6) . 2 ? 
In1 Ge2 Ca3 133.36(4) . 2 ? 
In2 Ge2 Ca3 70.98(5) 6_657 2 ? 
Eu1 Ge2 Ca3 76.24(6) 2 2 ? 
Eu1 Ge2 Ca3 142.64(8) 2_565 2 ? 
Ca1 Ge2 Ca3 76.24(6) 2 2 ? 
Ca1 Ge2 Ca3 142.64(8) 2_565 2 ? 
Ca3 Ge2 Ca3 91.20(8) 2_565 2 ? 
Eu3 Ge2 Ca3 91.20(8) 2_565 2 ? 
Ge1 Ge2 Eu3 66.91(6) . 2 ? 
In1 Ge2 Eu3 133.36(4) . 2 ? 
In2 Ge2 Eu3 70.98(5) 6_657 2 ? 
Eu1 Ge2 Eu3 76.24(6) 2 2 ? 
Eu1 Ge2 Eu3 142.64(8) 2_565 2 ? 
Ca1 Ge2 Eu3 76.24(6) 2 2 ? 
Ca1 Ge2 Eu3 142.64(8) 2_565 2 ? 
Ca3 Ge2 Eu3 91.20(8) 2_565 2 ? 
Eu3 Ge2 Eu3 91.20(8) 2_565 2 ? 
Ca3 Ge2 Eu3 0.0 2 2 ? 
Ge1 Ge2 Eu2 64.94(5) . 5_556 ? 
In1 Ge2 Eu2 68.17(5) . 5_556 ? 
In2 Ge2 Eu2 135.57(3) 6_657 5_556 ? 
Eu1 Ge2 Eu2 77.54(5) 2 5_556 ? 
Eu1 Ge2 Eu2 141.82(7) 2_565 5_556 ? 
Ca1 Ge2 Eu2 77.54(5) 2 5_556 ? 
Ca1 Ge2 Eu2 141.82(7) 2_565 5_556 ? 
Ca3 Ge2 Eu2 131.85(8) 2_565 5_556 ? 
Eu3 Ge2 Eu2 131.85(8) 2_565 5_556 ? 
Ca3 Ge2 Eu2 71.14(5) 2 5_556 ? 
Eu3 Ge2 Eu2 71.14(5) 2 5_556 ? 
In1 Ge3 In1 105.83(6) 5_656 5_666 ? 
In1 Ge3 In1 73.80(4) 5_656 1_655 ? 
In1 Ge3 In1 73.80(4) 5_666 1_655 ? 
In1 Ge3 Eu1 73.80(4) 5_656 2 ? 
In1 Ge3 Eu1 149.13(7) 5_666 2 ? 
In1 Ge3 Eu1 132.47(4) 1_655 2 ? 
In1 Ge3 Ca1 73.80(4) 5_656 2 ? 
In1 Ge3 Ca1 149.13(7) 5_666 2 ? 
In1 Ge3 Ca1 132.47(4) 1_655 2 ? 
Eu1 Ge3 Ca1 0.00(6) 2 2 ? 
In1 Ge3 Eu1 149.13(7) 5_656 2_565 ? 
In1 Ge3 Eu1 73.80(4) 5_666 2_565 ? 
In1 Ge3 Eu1 132.47(4) 1_655 2_565 ? 
Eu1 Ge3 Eu1 90.93(8) 2 2_565 ? 
Ca1 Ge3 Eu1 90.93(8) 2 2_565 ? 
In1 Ge3 Ca1 149.13(7) 5_656 2_565 ? 
In1 Ge3 Ca1 73.80(4) 5_666 2_565 ? 
In1 Ge3 Ca1 132.47(4) 1_655 2_565 ? 
Eu1 Ge3 Ca1 90.93(8) 2 2_565 ? 
Ca1 Ge3 Ca1 90.93(8) 2 2_565 ? 
Eu1 Ge3 Ca1 0.00(10) 2_565 2_565 ? 
In1 Ge3 Ca1 70.99(4) 5_656 6_656 ? 
In1 Ge3 Ca1 70.99(4) 5_666 6_656 ? 
In1 Ge3 Ca1 119.75(7) 1_655 6_656 ? 
Eu1 Ge3 Ca1 80.18(6) 2 6_656 ? 
Ca1 Ge3 Ca1 80.18(6) 2 6_656 ? 
Eu1 Ge3 Ca1 80.18(6) 2_565 6_656 ? 
Ca1 Ge3 Ca1 80.18(6) 2_565 6_656 ? 
In1 Ge3 Eu1 70.99(4) 5_656 6_656 ? 
In1 Ge3 Eu1 70.99(4) 5_666 6_656 ? 
In1 Ge3 Eu1 119.75(7) 1_655 6_656 ? 
Eu1 Ge3 Eu1 80.18(6) 2 6_656 ? 
Ca1 Ge3 Eu1 80.18(6) 2 6_656 ? 
Eu1 Ge3 Eu1 80.18(6) 2_565 6_656 ? 
Ca1 Ge3 Eu1 80.18(6) 2_565 6_656 ? 
Ca1 Ge3 Eu1 0.00(7) 6_656 6_656 ? 
In1 Ge3 Eu2 138.58(7) 5_656 5_666 ? 
In1 Ge3 Eu2 71.19(4) 5_666 5_666 ? 
In1 Ge3 Eu2 65.64(5) 1_655 5_666 ? 
Eu1 Ge3 Eu2 129.87(7) 2 5_666 ? 
Ca1 Ge3 Eu2 129.87(7) 2 5_666 ? 
Eu1 Ge3 Eu2 71.51(5) 2_565 5_666 ? 
Ca1 Ge3 Eu2 71.51(5) 2_565 5_666 ? 
Ca1 Ge3 Eu2 137.61(3) 6_656 5_666 ? 
Eu1 Ge3 Eu2 137.61(3) 6_656 5_666 ? 
In1 Ge3 Ca2 138.58(7) 5_656 5_666 ? 
In1 Ge3 Ca2 71.19(4) 5_666 5_666 ? 
In1 Ge3 Ca2 65.64(5) 1_655 5_666 ? 
Eu1 Ge3 Ca2 129.87(7) 2 5_666 ? 
Ca1 Ge3 Ca2 129.87(7) 2 5_666 ? 
Eu1 Ge3 Ca2 71.51(5) 2_565 5_666 ? 
Ca1 Ge3 Ca2 71.51(5) 2_565 5_666 ? 
Ca1 Ge3 Ca2 137.61(3) 6_656 5_666 ? 
Eu1 Ge3 Ca2 137.61(3) 6_656 5_666 ? 
Eu2 Ge3 Ca2 0.00(5) 5_666 5_666 ? 
In1 Ge3 Ca2 71.19(4) 5_656 5_656 ? 
In1 Ge3 Ca2 138.58(7) 5_666 5_656 ? 
In1 Ge3 Ca2 65.64(5) 1_655 5_656 ? 
Eu1 Ge3 Ca2 71.51(5) 2 5_656 ? 
Ca1 Ge3 Ca2 71.51(5) 2 5_656 ? 
Eu1 Ge3 Ca2 129.87(7) 2_565 5_656 ? 
Ca1 Ge3 Ca2 129.87(7) 2_565 5_656 ? 
Ca1 Ge3 Ca2 137.61(3) 6_656 5_656 ? 
Eu1 Ge3 Ca2 137.61(3) 6_656 5_656 ? 
Eu2 Ge3 Ca2 84.45(6) 5_666 5_656 ? 
Ca2 Ge3 Ca2 84.45(6) 5_666 5_656 ? 
 
_diffrn_measured_fraction_theta_max    1.000 
_diffrn_reflns_theta_full              25.00 
_diffrn_measured_fraction_theta_full   1.000 
_refine_diff_density_max    1.373 
_refine_diff_density_min   -1.428 
_refine_diff_density_rms    0.308 


####################################################################
#                         END of CIF
####################################################################
